# Supplementary material for: Genome-Wide RNA Sequencing of Human Trabecular Meshwork Cells Treated with TGF-β1: Relevance to Pseudoexfoliation Glaucoma
Source: MDPI journal article supplement (doi:10.3390/biom12111693), 2022-11-15
Supplement: s1 [file s1]

Genome-wide RNA sequencing of human trabecular meshwork cells treated with TGF- $\beta$ 1 : relevance to pseudoexfoliation glaucoma : supplemental Table S1

**Table S1.** RT-qPCR primer sequences

| gene symbol | sequences                                                                                |
|-------------|------------------------------------------------------------------------------------------|
| TSPAN2      | <b>F</b> 5' - CCAGAGTATTTCTATGTGGGGCTG - 3'<br><b>R</b> 5' - AGCAAATATCACCAGGAGGCAG - 3' |
| THBS1       | <b>F</b> 5' - GACTCCGCATCGCAAAGGG - 3'<br><b>R</b> 5' - GAGGACACTGGTAGAGCTGGAG - 3'      |
| ADAM12      | <b>F</b> 5' - ATCAGTGTCTTCGGCGTTCA - 3'<br><b>R</b> 5' - GGCAATTCTTCCTGTTGTTACATACC - 3' |
| IER3        | <b>F</b> 5' - CTCGAGTGGTCCGGCG - 3'<br><b>R</b> 5' - ACGATGGTGAGCAGCAGAAA - 3'           |
| LOXL1       | <b>F</b> 5' - ACAGCACCTGTGACTTCGGCAA - 3'<br><b>R</b> 5' - CGGTTATGTCGATCCACTGGCA - 3'   |
| ADAM19      | <b>F</b> 5' - CGGGCCACCTCGAA - 3'<br><b>R</b> 5' - CCGTTTCATTCTGCGAGGTT - 3'             |
| NOX4        | <b>F</b> 5' - CACAGACTTGGCTTTGGATTTC - 3'<br><b>R</b> 5' - GGATGACTTATGACCGAAATGATG - 3' |
| CCN2        | <b>F</b> 5' - GCTTACCGACTGGAAGACACG - 3'<br><b>R</b> 5' - CGGATGCACTTTTTGCCCTT - 3'      |
| GAPDH       | <b>F</b> 5' - GGAGCGAGATCCCTCCAAAAT - 3'<br><b>R</b> 5' - GGCTGTTGTCATACTTCTCATGG - 3'   |
