# Supplementary material for: Genome-Wide RNA Sequencing of Human Trabecular Meshwork Cells Treated with TGF-β1: Relevance to Pseudoexfoliation Glaucoma
Source: MDPI journal article supplement (doi:10.3390/biom12111693), 2022-11-15
Supplement: s1 [file s1]

Supplemental Figure S2 of Genome-wide RNA sequencing of human trabecular meshwork cells treated with TGF- $\beta$ 1 : relevance to pseudoexfoliation glaucoma

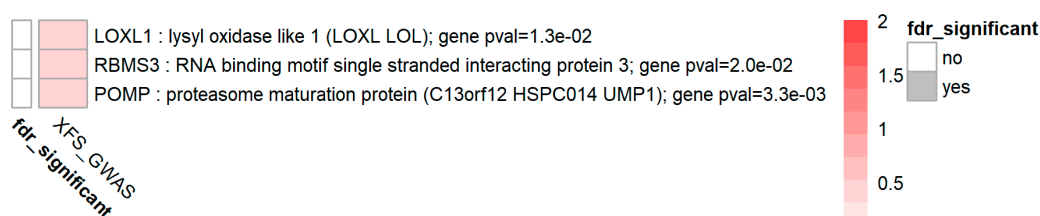

**Figure S2.** Genes associated with XFS from genome-wide association studies (GWAS). Heatmap showing genes with nominal p-value  $p < 0.05$  for genes associated with genome-wide association studies for pseudoexfoliation syndrome (XFS). Heatmap colours correspond to fold change expressed as  $\log_2FC$  which has been limited to a range of  $[0, 2]$  for clarity. The annotation bar on the left shows if the genome-wide false discovery rate has an  $FDR < 0.05$  (in which FDR is the BH corrected p-value) for a particular gene which is the case for none of the genes shown.
