# Supplementary material for: Genome-Wide RNA Sequencing of Human Trabecular Meshwork Cells Treated with TGF-β1: Relevance to Pseudoexfoliation Glaucoma
Source: MDPI journal article supplement (doi:10.3390/biom12111693), 2022-11-15
Supplement: s1 [file s1]

Supplemental Figure S1 of Genome-wide RNA sequencing of human trabecular meshwork cells treated with TGF- $\beta$ 1 : relevance to pseudoexfoliation glaucoma

A

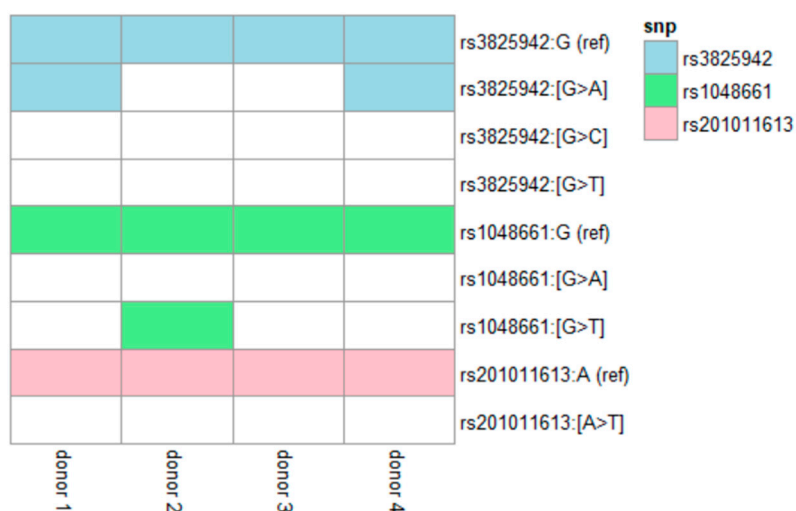

B

| donor | sex |
|-------|-----|
| 1     | M   |
| 2     | F   |
| 3     | F   |
| 4     | M   |

**Figure S1.** LOXL1 SNPs and sex of donors in this study (A) LOXL1 genotyping for several SNPs. Donors 1 and 4 were heterozygous for rs3825942:[G>A] while donor 2 was heterozygous for SNP rs1048661:[G>T]. Donor 3 was wild-type and did not have any of the studied SNPs. For rs201011613 all donors were wild-type (B) donor sex.
