# Supplementary material for: Genome-Wide RNA Sequencing of Human Trabecular Meshwork Cells Treated with TGF-β1: Relevance to Pseudoexfoliation Glaucoma
Source: Biomolecules. 2022 Nov 15;12(11):1693. doi: 10.3390/biom12111693 (PMC9687758; doi:10.3390/biom12111693)
Supplement: Supplementary file 1 [file biomolecules-12-01693-s001.zip]

Archive with 5 entries (5 files):
- Figure_S1.pdf
- Figure_S2.pdf
- Table_S1.pdf
- Table_S2.xlsx
- Table_S3.xlsx
