# Supplementary material for: Genome-Wide RNA Sequencing of Human Trabecular Meshwork Cells Treated with TGF-β1: Relevance to Pseudoexfoliation Glaucoma
Source: Biomolecules. 2022 Nov 15;12(11):1693. doi: 10.3390/biom12111693 (PMC9687758; doi:10.3390/biom12111693)
Supplement: Supplementary file 1 [file biomolecules-12-01693-s001.zip › Table_S2.xlsx]

## Sheet: Sheet1
gene_id	gene_symbol	log2FC	log2CPM	basemean	pval	padj
ENSG00000137331.12	IER3	2.17447	7.34457	3221.24	1.05188e-42	1.35504e-38
ENSG00000096696.14	DSP	1.36284	6.6214	1963.5	7.7475e-31	4.99016e-27
ENSG00000134198.10	TSPAN2	2.58512	5.40815	842.644	1.90014e-23	8.15919e-20
ENSG00000148848.14	ADAM12	1.98464	6.26554	1536.28	1.80022e-20	5.79761e-17
ENSG00000115129.14	TP53I3	1.236	6.36617	1642.88	1.13978e-17	2.93652e-14
ENSG00000072682.18	P4HA2	1.75626	7.61673	3906.69	2.13964e-17	4.59381e-14
ENSG00000133083.15	DCLK1	-2.09547	3.59599	237.539	3.47079e-17	6.38725e-14
ENSG00000166923.12	GREM1	3.08397	3.46428	219.989	1.42223e-16	2.29014e-13
ENSG00000138650.9	PCDH10	2.10136	7.65524	4012.79	3.02066e-16	4.32357e-13
ENSG00000206190.12	ATP10A	2.12601	3.45806	218.74	1.03442e-15	1.33254e-12
ENSG00000138623.10	SEMA7A	2.65064	4.35793	408.949	2.78183e-15	3.25777e-12
ENSG00000070404.10	FSTL3	2.43092	7.995	5078.47	1.43234e-14	1.53761e-11
ENSG00000176170.14	SPHK1	1.40942	6.82527	2242.15	6.40884e-14	6.35067e-11
ENSG00000120708.17	TGFBI	2.47663	10.8507	36825.4	4.70932e-13	3.79159e-10
ENSG00000119681.12	LTBP2	1.80982	10.6132	31242.4	4.4515e-13	3.79159e-10
ENSG00000182985.17	CADM1	1.68078	3.32003	196.808	4.40136e-13	3.79159e-10
ENSG00000203805.11	PLPP4	1.33271	6.04557	1305.7	6.68892e-12	5.06863e-09
ENSG00000095587.9	TLL2	1.88499	4.47701	444.105	7.94467e-12	5.68573e-09
ENSG00000139211.6	AMIGO2	1.8524	7.2887	3096.26	9.79383e-12	6.64022e-09
ENSG00000135919.14	SERPINE2	2.16456	9.18355	11587.6	1.3546e-11	8.30948e-09
ENSG00000119711.13	ALDH6A1	-1.22135	4.80663	550.442	1.33032e-11	8.30948e-09
ENSG00000174792.11	ODAPH	10.6973	7.14683	2806.77	1.86941e-11	1.07162e-08
ENSG00000183691.6	NOG	1.96677	5.61792	971.644	1.9133e-11	1.07162e-08
ENSG00000172348.14	RCAN2	-1.0449	6.51948	1798.83	2.71101e-11	1.45514e-08
ENSG00000276168.1	RN7SL1	-1.07977	5.55951	933.63	6.58668e-11	3.39398e-08
ENSG00000177791.12	MYOZ1	3.4677	2.35503	102.23	1.03257e-10	5.116e-08
ENSG00000164283.13	ESM1	4.28789	7.00537	2576.8	1.20748e-10	5.76103e-08
ENSG00000196549.12	MME	-2.48899	7.36137	3266.76	1.52825e-10	7.03106e-08
ENSG00000124225.16	PMEPA1	2.49589	4.41671	426.268	2.84844e-10	1.22312e-07
ENSG00000187498.16	COL4A1	1.88807	9.70972	16568.7	2.76237e-10	1.22312e-07
ENSG00000113140.11	SPARC	1.38084	11.354	52082.8	3.34275e-10	1.38908e-07
ENSG00000164574.16	GALNT10	1.11209	8.1083	5484.59	3.98441e-10	1.60397e-07
ENSG00000159251.8	ACTC1	3.6209	3.98032	315.849	5.82962e-10	2.27567e-07
ENSG00000106537.8	TSPAN13	2.29069	4.3978	417.218	7.78958e-10	2.95133e-07
ENSG00000133216.16	EPHB2	1.48476	5.46534	888.963	9.65374e-10	3.55313e-07
ENSG00000182541.18	LIMK2	1.00711	6.34658	1608.71	1.02866e-09	3.68063e-07
ENSG00000175899.15	A2M	-2.41244	7.6831	4032.81	1.05716e-09	3.68063e-07
ENSG00000197321.15	SVIL	-1.46091	7.87346	4593.18	2.75329e-09	9.33366e-07
ENSG00000175183.10	CSRP2	0.985628	5.7424	1059.25	3.19251e-09	1.05451e-06
ENSG00000184226.15	PCDH9	1.00157	5.93396	1211.76	3.59591e-09	1.15806e-06
ENSG00000170558.10	CDH2	1.88493	7.8739	4678.39	3.84262e-09	1.20733e-06
ENSG00000213694.6	S1PR3	-1.27099	3.98128	313.73	4.1493e-09	1.27265e-06
ENSG00000260549.2	MT1L	1.59892	5.55238	935.806	4.24839e-09	1.27274e-06
ENSG00000166741.8	NNMT	1.19806	6.33851	1602.8	4.50592e-09	1.31921e-06
ENSG00000178726.7	THBD	1.81063	5.06325	666.968	7.0892e-09	2.0294e-06
ENSG00000079931.15	MOXD1	-1.25565	5.28883	770.539	8.46338e-09	2.37012e-06
ENSG00000153214.11	TMEM87B	1.7127	6.26429	1532.87	9.05586e-09	2.48208e-06
ENSG00000167191.12	GPRC5B	1.4064	4.79184	546.229	1.21363e-08	3.19062e-06
ENSG00000182585.10	EPGN	1.22161	6.19326	1475.01	1.20744e-08	3.19062e-06
ENSG00000111424.12	VDR	1.30487	4.23689	372.2	1.79998e-08	4.63747e-06
ENSG00000144583.5	MARCHF4	2.07061	6.62857	1968.7	2.00427e-08	5.06256e-06
ENSG00000151136.15	BTBD11	-1.37234	6.07329	1321.36	2.30245e-08	5.70387e-06
ENSG00000135636.14	DYSF	1.10946	7.31429	3132.47	2.36304e-08	5.74352e-06
ENSG00000101265.16	RASSF2	1.34174	3.77147	270.052	2.73663e-08	6.52839e-06
ENSG00000103489.12	XYLT1	2.36562	6.30191	1573.69	3.05735e-08	7.16088e-06
ENSG00000169826.8	CSGALNACT2	0.821795	6.72685	2106.47	3.22857e-08	7.42687e-06
ENSG00000180447.7	GAS1	-1.36405	6.69095	2037.2	3.7959e-08	8.57873e-06
ENSG00000198768.11	APCDD1L	1.1354	5.44891	871.92	4.30926e-08	9.57102e-06
ENSG00000130203.10	APOE	-2.23241	5.88182	1133.25	4.99661e-08	1.09095e-05
ENSG00000159674.12	SPON2	-2.15123	4.9246	589.649	5.20664e-08	1.11787e-05
ENSG00000157168.20	NRG1	1.34603	5.61167	962.453	5.78085e-08	1.2208e-05
ENSG00000175137.11	SH3BP5L	1.10365	6.51057	1807.72	7.32833e-08	1.52264e-05
ENSG00000182575.8	NXPH3	2.09332	5.76116	1082.28	7.52141e-08	1.53795e-05
ENSG00000171303.7	KCNK3	1.38189	5.02737	648.601	7.64967e-08	1.53974e-05
ENSG00000100003.18	SEC14L2	1.36905	5.11126	690.969	8.81583e-08	1.72069e-05
ENSG00000070614.15	NDST1	1.21915	8.31322	6307.41	8.76639e-08	1.72069e-05
ENSG00000134871.19	COL4A2	1.15875	10.8113	35477.3	1.49087e-07	2.86648e-05
ENSG00000167772.12	ANGPTL4	4.22147	5.40556	845.34	1.59408e-07	3.01984e-05
ENSG00000086991.13	NOX4	4.03133	1.39703	52.7114	1.67707e-07	3.05068e-05
ENSG00000126803.9	HSPA2	-1.21738	4.40648	414.072	1.6814e-07	3.05068e-05
ENSG00000106123.12	EPHB6	-1.66381	5.65613	994.161	1.66165e-07	3.05068e-05
ENSG00000099860.9	GADD45B	1.7989	5.33387	798.307	1.84858e-07	3.30742e-05
ENSG00000110427.16	KIAA1549L	1.90024	4.50397	455.826	1.92319e-07	3.3542e-05
ENSG00000128590.5	DNAJB9	0.750186	5.68442	1018.51	1.9268e-07	3.3542e-05
ENSG00000165891.16	E2F7	1.12214	4.30608	394.656	1.97066e-07	3.38481e-05
ENSG00000122884.12	P4HA1	1.1069	6.5472	1862.63	2.08874e-07	3.54042e-05
ENSG00000140416.23	TPM1	1.4242	10.3196	25327.9	2.16572e-07	3.58127e-05
ENSG00000086062.13	B4GALT1	1.01193	7.73815	4242.72	2.16844e-07	3.58127e-05
ENSG00000164040.18	PGRMC2	0.57377	7.09192	2692.87	2.61224e-07	4.2596e-05
ENSG00000143768.13	LEFTY2	3.99335	2.24118	95.5712	2.71516e-07	4.37208e-05
ENSG00000136010.14	ALDH1L2	0.879551	5.22239	743.204	2.9921e-07	4.75855e-05
ENSG00000134986.14	NREP	2.20458	3.70434	259.43	3.18267e-07	4.9999e-05
ENSG00000176915.15	ANKLE2	0.751502	6.42689	1706.23	3.22552e-07	5.00616e-05
ENSG00000146674.15	IGFBP3	1.82494	9.38197	13346.4	3.57277e-07	5.47909e-05
ENSG00000196923.14	PDLIM7	0.729691	8.86644	9259.75	3.69926e-07	5.60634e-05
ENSG00000117318.9	ID3	1.11364	8.00228	5081.05	3.7536e-07	5.62254e-05
ENSG00000081052.13	COL4A4	1.49978	4.02953	320.341	4.09954e-07	6.07015e-05
ENSG00000126016.15	AMOT	-1.68064	3.5077	221.629	4.28331e-07	6.27018e-05
ENSG00000159403.18	C1R	-1.84493	7.72459	4159.02	4.40089e-07	6.36992e-05
ENSG00000138735.16	PDE5A	-1.56166	7.51636	3600.37	4.73113e-07	6.77182e-05
ENSG00000149256.16	TENM4	2.28638	5.34563	810.113	4.8416e-07	6.78077e-05
ENSG00000131435.13	PDLIM4	0.869391	7.15403	2826.09	4.89529e-07	6.78077e-05
ENSG00000163431.13	LMOD1	-1.22418	8.48773	7061.12	4.85793e-07	6.78077e-05
ENSG00000110002.16	VWA5A	-0.818975	5.66552	1000.33	5.05682e-07	6.92999e-05
ENSG00000072952.18	IRAG1	-0.975978	7.66203	3975.96	5.86794e-07	7.95693e-05
ENSG00000136603.14	SKIL	1.37214	4.50137	448.62	6.89445e-07	9.20321e-05
ENSG00000102575.13	ACP5	-2.28347	2.29294	94.9459	6.92991e-07	9.20321e-05
ENSG00000099282.10	TSPAN15	2.25013	3.76803	270.307	7.67003e-07	0.000100822
ENSG00000145348.17	TBCK	-0.714145	4.91092	591.92	8.34204e-07	0.000108548
ENSG00000101670.12	LIPG	1.46253	4.29542	387.727	9.10808e-07	0.00011733
ENSG00000158008.10	EXTL1	1.7229	6.62279	1943.61	1.016e-06	0.000129586
ENSG00000077157.22	PPP1R12B	-1.79036	7.35776	3208.85	1.02723e-06	0.000129733
ENSG00000205213.14	LGR4	0.856366	4.65518	500.53	1.07902e-06	0.000134951
ENSG00000172137.19	CALB2	1.60717	3.25566	187.89	1.09136e-06	0.000135181
ENSG00000143387.13	CTSK	-1.56357	10.8296	35658.1	1.2967e-06	0.000159086
ENSG00000122254.7	HS3ST2	2.7829	3.05796	164.633	1.38477e-06	0.000168289
ENSG00000173457.11	PPP1R14B	0.68732	7.54794	3719.62	1.52249e-06	0.000183296
ENSG00000135074.16	ADAM19	1.7874	7.08105	2694.89	1.60509e-06	0.000191451
ENSG00000106636.8	YKT6	0.632963	7.90327	4752.21	1.66998e-06	0.000197364
ENSG00000079819.19	EPB41L2	-0.797472	6.7856	2174.43	1.83544e-06	0.000214947
ENSG00000075223.14	SEMA3C	1.06396	6.67171	2024.84	1.85635e-06	0.000215437
ENSG00000147889.17	CDKN2A	0.832895	7.19051	2923.01	1.94715e-06	0.000222077
ENSG00000072210.19	ALDH3A2	-1.23577	5.54307	916.053	1.94804e-06	0.000222077
ENSG00000112715.24	VEGFA	0.817177	6.91293	2388.22	2.41506e-06	0.000272902
ENSG00000164418.20	GRIK2	1.60112	4.06681	332.615	2.48002e-06	0.000277805
ENSG00000140564.12	FURIN	0.792311	7.82207	4495.52	2.56959e-06	0.000285358
ENSG00000100350.14	FOXRED2	-0.846015	5.43827	850.211	2.65552e-06	0.00029238
ENSG00000071282.12	LMCD1	2.37247	2.7702	135.381	2.70358e-06	0.000295148
ENSG00000162733.19	DDR2	-0.61954	8.27112	6110.23	2.96098e-06	0.000320532
ENSG00000006327.14	TNFRSF12A	1.06875	8.44218	6908.97	3.02086e-06	0.000324289
ENSG00000163975.12	MELTF	-0.964879	4.54024	454.99	3.1875e-06	0.00033935
ENSG00000163884.4	KLF15	-1.7915	2.47704	108.091	3.4902e-06	0.000368531
ENSG00000125430.9	HS3ST3B1	2.65084	2.85183	145.629	3.54401e-06	0.000371171
ENSG00000137868.19	STRA6	2.31287	3.83928	289.503	3.60441e-06	0.000374451
ENSG00000181458.10	TMEM45A	0.689085	5.46649	874.499	3.65712e-06	0.000376888
ENSG00000141696.13	P3H4	0.82591	6.40362	1687.17	3.77421e-06	0.000385868
ENSG00000116774.12	OLFML3	-1.37259	6.70932	2073.66	3.86307e-06	0.000391843
ENSG00000107984.10	DKK1	1.91702	7.28218	3103.78	3.9787e-06	0.000400419
ENSG00000105290.13	APLP1	0.767806	5.42469	851.638	4.14979e-06	0.0004144
ENSG00000139645.10	ANKRD52	0.550684	7.62596	3910.77	4.24551e-06	0.000420697
ENSG00000130635.16	COL5A1	1.33386	7.70475	4174.02	4.29968e-06	0.000422812
ENSG00000134333.14	LDHA	1.50292	9.83938	18240.7	4.36341e-06	0.000425829
ENSG00000166147.14	FBN1	0.960913	8.75452	8629.82	4.4485e-06	0.000430869
ENSG00000173530.6	TNFRSF10D	0.85318	6.70565	2078.2	4.5057e-06	0.000433153
ENSG00000120742.11	SERP1	0.539464	7.46938	3516.95	4.77484e-06	0.000455625
ENSG00000279415.1	AC099494.2	2.41892	0.662525	31.695	4.82613e-06	0.000457134
ENSG00000100065.15	CARD10	-1.2852	2.86394	143.193	4.89426e-06	0.000460203
ENSG00000117385.16	P3H1	0.833677	6.73332	2119.62	5.00252e-06	0.000464465
ENSG00000182612.10	TSPAN10	-0.992381	6.82619	2225.07	5.0117e-06	0.000464465
ENSG00000100979.15	PLTP	-1.35315	7.50656	3578.82	5.75764e-06	0.000529785
ENSG00000164236.12	ANKRD33B	-2.1212	4.33498	396.64	5.99712e-06	0.000547907
ENSG00000176438.12	SYNE3	-1.95729	4.28506	386.244	6.06011e-06	0.000549763
ENSG00000155090.15	KLF10	1.29631	4.31093	394.417	6.25708e-06	0.000559748
ENSG00000165821.12	SALL2	-0.898851	4.19478	359.966	6.24969e-06	0.000559748
ENSG00000087085.15	ACHE	1.88076	1.35658	50.6836	6.90748e-06	0.000605321
ENSG00000115275.14	MOGS	0.685335	6.80278	2221.86	6.86513e-06	0.000605321
ENSG00000111907.21	TPD52L1	-1.33677	6.04518	1284.87	6.8771e-06	0.000605321
ENSG00000082438.17	COBLL1	-0.952205	5.81025	1104.21	7.00497e-06	0.000605625
ENSG00000173599.15	PC	-1.03484	5.23073	740.623	6.99357e-06	0.000605625
ENSG00000128655.18	PDE11A	1.57509	2.89853	148.378	7.86779e-06	0.000675686
ENSG00000141526.17	SLC16A3	1.1429	8.01545	5142.49	8.02705e-06	0.000684417
ENSG00000135048.14	CEMIP2	1.10459	5.5901	959.372	8.09727e-06	0.000684417
ENSG00000184785.6	SMIM10	-0.812803	4.41172	420.097	8.12884e-06	0.000684417
ENSG00000162645.13	GBP2	-1.05485	6.23944	1490.67	9.39494e-06	0.00078588
ENSG00000198846.6	TOX	-1.17582	2.52775	114.212	9.67231e-06	0.000803863
ENSG00000108950.12	FAM20A	-2.34768	4.56545	465.119	1.00202e-05	0.000827437
ENSG00000164465.19	DCBLD1	1.25365	4.55312	467.41	1.02263e-05	0.000839078
ENSG00000143878.10	RHOB	0.753854	6.8226	2241.13	1.09072e-05	0.000889282
ENSG00000143933.19	CALM2	0.902046	9.09378	10841.6	1.18479e-05	0.000959904
ENSG00000006534.16	ALDH3B1	-1.0069	5.90431	1168.58	1.24016e-05	0.00099848
ENSG00000018236.15	CNTN1	-1.03469	6.16763	1418.17	1.25942e-05	0.00100769
ENSG00000152422.16	XRCC4	1.604	3.43515	214.797	1.26949e-05	0.00100948
ENSG00000164125.15	GASK1B	-1.17092	5.86957	1150.77	1.28058e-05	0.00101205
ENSG00000075420.13	FNDC3B	0.834012	7.01465	2570.78	1.30579e-05	0.00101946
ENSG00000157110.16	RBPMS	-0.630585	7.3148	3129.97	1.30255e-05	0.00101946
ENSG00000187240.16	DYNC2H1	-0.74718	5.15374	701.469	1.34065e-05	0.00104038
ENSG00000102683.8	SGCG	2.01517	2.44398	108.498	1.35764e-05	0.00104102
ENSG00000101680.15	LAMA1	-1.71741	4.34876	406.896	1.35521e-05	0.00104102
ENSG00000168811.7	IL12A	1.81501	3.00452	159.37	1.50659e-05	0.00114839
ENSG00000162407.9	PLPP3	-0.742562	7.53734	3670.7	1.51549e-05	0.00114839
ENSG00000099337.5	KCNK6	1.51128	2.89704	147.682	1.61933e-05	0.0012199
ENSG00000113328.19	CCNG1	-0.493058	7.32543	3157.51	1.68413e-05	0.00126134
ENSG00000049540.17	ELN	2.33896	3.19266	180.48	1.7543e-05	0.00130629
ENSG00000159363.19	ATP13A2	0.891996	6.96013	2470.42	1.80597e-05	0.0013348
ENSG00000189067.13	LITAF	-0.821689	6.98397	2478.09	1.81331e-05	0.0013348
ENSG00000102996.5	MMP15	0.695476	6.36947	1640.5	1.89393e-05	0.00138623
ENSG00000006747.15	SCIN	-1.34904	7.63353	3929.02	1.94731e-05	0.00141725
ENSG00000168497.5	CAVIN2	-1.04718	4.36773	404.928	2.1962e-05	0.00158941
ENSG00000168874.13	ATOH8	0.728362	6.31684	1568.05	2.2978e-05	0.00165365
ENSG00000243927.6	MRPS6	-0.827761	4.97847	621.11	2.31073e-05	0.00165371
ENSG00000126561.16	STAT5A	-0.880404	4.75558	529.397	2.35022e-05	0.00167268
ENSG00000137522.18	RNF121	0.718629	4.67969	507.886	2.37774e-05	0.00167377
ENSG00000164220.7	F2RL2	-1.50452	4.67839	512.362	2.37466e-05	0.00167377
ENSG00000157680.15	DGKI	0.774581	6.0411	1298.9	2.39744e-05	0.00167847
ENSG00000109610.6	SOD3	-1.06673	6.56005	1856.45	2.44539e-05	0.00168617
ENSG00000159212.12	CLIC6	-1.08449	4.77472	524.885	2.4477e-05	0.00168617
ENSG00000132170.22	PPARG	-1.1315	3.72418	260.804	2.4449e-05	0.00168617
ENSG00000144655.15	CSRNP1	1.21195	4.20848	366.76	2.49013e-05	0.00169208
ENSG00000186564.6	FOXD2	-0.707731	4.17283	356.398	2.49033e-05	0.00169208
ENSG00000151491.14	EPS8	-0.770922	7.7383	4213.34	2.4957e-05	0.00169208
ENSG00000082781.12	ITGB5	0.976049	9.40499	13491.2	2.51037e-05	0.00169312
ENSG00000231131.8	LNCAROD	3.22475	0.749585	33.5193	2.54478e-05	0.00170739
ENSG00000183780.13	SLC35F3	1.88657	1.82195	69.6514	2.58886e-05	0.00172797
ENSG00000103335.22	PIEZO1	0.679018	8.92679	9618.47	2.70007e-05	0.00178371
ENSG00000071242.12	RPS6KA2	-0.845726	6.17263	1424.56	2.69595e-05	0.00178371
ENSG00000136888.7	ATP6V1G1	0.594809	7.53205	3665.8	2.78509e-05	0.00183049
ENSG00000212724.3	KRTAP2-3	2.58615	2.76957	136.612	2.89525e-05	0.00189323
ENSG00000137409.19	MTCH1	0.645554	8.81239	8911.34	2.99103e-05	0.00194598
ENSG00000116117.18	PARD3B	-0.78038	5.05974	656.805	3.011e-05	0.00194913
ENSG00000168528.12	SERINC2	0.668903	6.64346	1990.68	3.04882e-05	0.00196374
ENSG00000089639.11	GMIP	0.659149	4.30829	393.113	3.11586e-05	0.00198705
ENSG00000161091.13	MFSD12	0.607165	6.44771	1733.35	3.11358e-05	0.00198705
ENSG00000137877.10	SPTBN5	1.85928	2.18315	89.9162	3.24364e-05	0.00205835
ENSG00000105894.12	PTN	-0.849274	5.03977	648.54	3.29462e-05	0.00208045
ENSG00000184640.19	SEPTIN9	-0.511187	8.47885	7057.1	3.33452e-05	0.00208521
ENSG00000177363.5	LRRN4CL	-1.23234	5.63724	971.864	3.33118e-05	0.00208521
ENSG00000173641.17	HSPB7	0.6817	6.69854	2053.48	3.4885e-05	0.00216052
ENSG00000185565.12	LSAMP	-1.13912	4.05512	327.672	3.47897e-05	0.00216052
ENSG00000251493.5	FOXD1	1.01345	4.1885	362.337	3.53243e-05	0.00217726
ENSG00000145817.17	YIPF5	0.798849	6.77892	2179.88	3.60522e-05	0.00219068
ENSG00000134531.10	EMP1	-1.14364	5.402	850.819	3.57787e-05	0.00219068
ENSG00000125378.16	BMP4	-1.22838	4.46478	434.331	3.59237e-05	0.00219068
ENSG00000069702.11	TGFBR3	-0.980652	6.00626	1271.21	3.66789e-05	0.0022183
ENSG00000116584.20	ARHGEF2	-0.526003	6.69255	2037.68	3.74323e-05	0.00225328
ENSG00000168994.14	PXDC1	1.02658	5.77586	1084.75	3.92338e-05	0.00235074
ENSG00000108840.15	HDAC5	-1.06815	6.74224	2102.67	3.9759e-05	0.00237118
ENSG00000187634.12	SAMD11	2.00877	3.87851	290.664	4.10017e-05	0.00243403
ENSG00000187955.12	COL14A1	-1.85448	5.65539	995.318	4.25936e-05	0.00251693
ENSG00000187260.16	WDR86	-3.16985	1.48207	54.2829	4.37062e-05	0.00257088
ENSG00000180875.5	GREM2	1.19347	6.06286	1344.69	4.4931e-05	0.00263091
ENSG00000089472.16	HEPH	-0.66321	6.82374	2235.54	4.53416e-05	0.00264295
ENSG00000125966.10	MMP24	0.997085	3.73648	264.906	4.65437e-05	0.00270079
ENSG00000229847.9	EMX2OS	-0.669356	6.19518	1447.7	4.77295e-05	0.00275718
ENSG00000145349.17	CAMK2D	-0.767531	7.70412	4116.39	4.92773e-05	0.00283389
ENSG00000041353.10	RAB27B	-1.11961	6.7229	2101.54	4.95491e-05	0.00283685
ENSG00000105509.11	HAS1	2.36829	1.41569	52.4651	5.22558e-05	0.00297858
ENSG00000113070.8	HBEGF	1.631	5.43619	860.814	5.29166e-05	0.00300296
ENSG00000134245.18	WNT2B	-1.87476	4.07836	337.02	5.31554e-05	0.00300328
ENSG00000144460.12	NYAP2	3.10795	2.79973	135.925	5.3447e-05	0.00300657
ENSG00000126822.17	PLEKHG3	-0.687873	4.81782	553.943	5.50535e-05	0.00308347
ENSG00000175482.9	POLD4	0.725469	4.03696	325.628	5.58513e-05	0.00311462
ENSG00000100600.15	LGMN	0.754292	7.02008	2575.14	5.61202e-05	0.00311612
ENSG00000132432.14	SEC61G	0.726645	6.88931	2355.64	5.7027e-05	0.00315288
ENSG00000106799.13	TGFBR1	0.672102	5.84038	1134.21	5.99811e-05	0.00330204
ENSG00000158710.15	TAGLN2	0.913992	9.29039	12422.6	6.14923e-05	0.00337082
ENSG00000171051.9	FPR1	2.98583	1.44038	53.3902	6.23199e-05	0.00340171
ENSG00000145936.9	KCNMB1	1.42442	4.88302	586.208	6.57059e-05	0.00357141
ENSG00000116406.19	EDEM3	0.515902	5.52838	917.364	6.62243e-05	0.00358446
ENSG00000111077.18	TNS2	-1.40532	5.52685	906.748	6.80516e-05	0.00366795
ENSG00000213853.10	EMP2	-0.553229	5.32932	787.861	6.90548e-05	0.00370652
ENSG00000130066.16	SAT1	0.509771	8.06663	5323.41	7.03079e-05	0.00375812
ENSG00000064652.11	SNX24	0.955839	3.6554	250.264	7.32055e-05	0.00389683
ENSG00000141469.18	SLC14A1	-2.38863	2.90645	151.754	7.37421e-05	0.00390924
ENSG00000172057.10	ORMDL3	0.519231	6.45222	1736.2	7.48167e-05	0.00394996
ENSG00000078725.13	BRINP1	-0.704697	4.81904	555.357	7.85908e-05	0.00413227
ENSG00000073756.12	PTGS2	1.23908	6.90954	2410.36	8.00656e-05	0.0041927
ENSG00000178752.16	ERFE	-1.14977	3.08667	167.124	8.11832e-05	0.00423401
ENSG00000011478.12	QPCTL	0.644588	5.76319	1079.14	8.15526e-05	0.00423613
ENSG00000152818.18	UTRN	-0.532734	6.76937	2154.36	8.24826e-05	0.00426723
ENSG00000118985.16	ELL2	0.725252	6.68361	2040.77	8.43663e-05	0.00432991
ENSG00000027847.14	B4GALT7	0.576729	5.94028	1220.76	8.41966e-05	0.00432991
ENSG00000184752.13	NDUFA12	0.687856	5.70816	1035.07	8.47387e-05	0.00433176
ENSG00000078018.20	MAP2	-1.27572	4.84898	561.607	8.52786e-05	0.00433693
ENSG00000146966.13	DENND2A	-2.53275	2.06497	83.4202	8.55131e-05	0.00433693
ENSG00000197256.10	KANK2	-0.80381	8.52947	7256.06	8.61569e-05	0.00435245
ENSG00000236824.2	BCYRN1	1.00819	3.83006	282.212	9.20863e-05	0.00463381
ENSG00000158019.21	BABAM2	-0.583152	4.69931	510.796	9.24741e-05	0.00463522
ENSG00000131015.5	ULBP2	1.75364	2.85475	143.885	9.87806e-05	0.00493214
ENSG00000197780.10	TAF13	0.881017	6.23539	1494.58	9.97684e-05	0.00496223
ENSG00000115468.12	EFHD1	1.28507	4.85471	573.304	0.000102727	0.00508971
ENSG00000106366.9	SERPINE1	2.34063	11.1578	45499.8	0.000106209	0.00522207
ENSG00000182379.10	NXPH4	1.70732	3.7351	266.213	0.0001059	0.00522207
ENSG00000161638.11	ITGA5	0.634814	8.83677	9140.28	0.000108024	0.00529113
ENSG00000130827.6	PLXNA3	0.549522	7.80401	4448.52	0.0001093	0.00533336
ENSG00000211445.12	GPX3	0.986904	4.70979	514.039	0.000109848	0.00533986
ENSG00000198796.7	ALPK2	1.27859	4.79452	547.263	0.000111806	0.00537421
ENSG00000130508.11	PXDN	0.749843	8.56053	7521.32	0.000111736	0.00537421
ENSG00000109762.16	SNX25	0.567283	5.75881	1069.53	0.00011165	0.00537421
ENSG00000144867.12	SRPRB	0.713337	6.22173	1479.8	0.000113616	0.00542074
ENSG00000184840.12	TMED9	0.615302	8.7888	8796.75	0.000113278	0.00542074
ENSG00000163820.15	FYCO1	-0.781204	6.90812	2364.29	0.000115479	0.00548928
ENSG00000132561.14	MATN2	-1.2744	5.24864	745.506	0.000118235	0.00559962
ENSG00000162687.18	KCNT2	-1.62673	2.55042	114.028	0.000123249	0.00581575
ENSG00000067057.17	PFKP	0.785805	8.58065	7589.69	0.000126238	0.00591344
ENSG00000187239.17	FNBP1	-0.690525	6.1647	1408.96	0.00012578	0.00591344
ENSG00000073008.15	PVR	1.38861	8.0108	5117.26	0.000127046	0.00592973
ENSG00000099849.15	RASSF7	1.14874	3.89033	293.479	0.000131843	0.00613143
ENSG00000172572.7	PDE3A	-0.876648	5.20639	729.667	0.000132769	0.00615229
ENSG00000164687.11	FABP5	0.897016	5.07946	676.46	0.000134758	0.00620596
ENSG00000101955.15	SRPX	-0.608338	5.61343	970.116	0.000135373	0.00620596
ENSG00000108797.12	CNTNAP1	-0.694137	6.15916	1411.94	0.000134961	0.00620596
ENSG00000104881.16	PPP1R13L	1.20754	3.91445	299.88	0.000141793	0.00647721
ENSG00000165507.9	DEPP1	-1.68577	4.78949	542.495	0.000143597	0.00653645
ENSG00000186908.14	ZDHHC17	0.63525	4.91583	597.73	0.000144244	0.0065428
ENSG00000136235.17	GPNMB	-0.813124	10.3895	26385.3	0.000146329	0.00661408
ENSG00000246859.3	STARD4-AS1	1.97343	1.51479	56.9764	0.000150986	0.00677702
ENSG00000133943.20	DGLUCY	-0.795527	4.95829	611.996	0.000150567	0.00677702
ENSG00000187391.22	MAGI2	-0.716049	3.89051	292.307	0.000153721	0.00687583
ENSG00000184500.16	PROS1	-0.564513	6.43993	1710.49	0.000155808	0.00692108
ENSG00000065057.9	NTHL1	-0.645541	3.97157	309.322	0.000155576	0.00692108
ENSG00000198108.4	CHSY3	0.834332	3.46408	219.193	0.00015769	0.00695674
ENSG00000182326.15	C1S	-1.1084	8.23491	5917.31	0.000157594	0.00695674
ENSG00000172379.21	ARNT2	-0.646395	4.42795	421.624	0.000164395	0.00722777
ENSG00000047648.23	ARHGAP6	-1.9695	0.964208	38.3866	0.000167774	0.00735123
ENSG00000000971.16	CFH	-0.955624	6.95309	2441.8	0.000168892	0.00737515
ENSG00000103994.17	ZNF106	-0.549506	7.5267	3633.66	0.000169475	0.00737561
ENSG00000105520.10	PLPPR2	0.469384	7.22216	2964.68	0.000171194	0.00742532
ENSG00000066027.12	PPP2R5A	-0.744316	5.1637	703.96	0.000173405	0.00749597
ENSG00000133110.15	POSTN	3.09119	7.71429	4249.1	0.000177097	0.00763
ENSG00000111186.13	WNT5B	1.2558	8.20306	5848.35	0.000184357	0.0079163
ENSG00000143641.10	GALNT2	0.668566	7.91395	4800.43	0.000185563	0.00794158
ENSG00000247095.3	MIR210HG	1.44809	1.82129	70.4354	0.000186403	0.00795113
ENSG00000100196.11	KDELR3	0.918326	6.76723	2182.01	0.000188069	0.00799574
ENSG00000113583.8	C5orf15	0.552347	6.17272	1431	0.000190477	0.00807148
ENSG00000100994.12	PYGB	-0.549691	8.72829	8419.47	0.00019308	0.00815495
ENSG00000133019.12	CHRM3	-1.03906	4.15961	351.121	0.000196167	0.00825824
ENSG00000119899.13	SLC17A5	0.448805	6.25782	1518.84	0.000196972	0.00826512
ENSG00000175928.6	LRRN1	1.13991	3.98619	310.336	0.000198794	0.00828761
ENSG00000111271.15	ACAD10	-0.711081	4.4019	416.506	0.000198461	0.00828761
ENSG00000138448.12	ITGAV	0.574359	7.61827	3889.75	0.000205107	0.00849576
ENSG00000133321.11	PLAAT4	-1.9176	3.04539	162.896	0.000204481	0.00849576
ENSG00000149294.16	NCAM1	-0.490654	7.03833	2606.79	0.000207886	0.0085833
ENSG00000197635.10	DPP4	-0.921183	6.76998	2151.4	0.000210155	0.00864926
ENSG00000136824.19	SMC2	-1.15112	6.26989	1521.53	0.000211118	0.00866121
ENSG00000175513.9	TSGA10IP	2.58989	0.549087	29.4218	0.000212562	0.00869276
ENSG00000147234.10	FRMPD3	2.03226	3.59432	236.882	0.000213305	0.00869554
ENSG00000169116.11	PARM1	0.963959	4.9269	602.618	0.000220563	0.00896308
ENSG00000111711.10	GOLT1B	0.633918	5.56883	943.436	0.000221449	0.00897078
ENSG00000062716.13	VMP1	0.832586	6.63828	1981.68	0.000226892	0.00916243
ENSG00000181467.5	RAP2B	-0.750109	6.46436	1743.61	0.000233728	0.00940901
ENSG00000198805.12	PNP	1.14325	5.12753	698.191	0.000242322	0.00963453
ENSG00000164976.9	MYORG	0.991433	3.53824	231.943	0.000240105	0.00963453
ENSG00000134369.15	NAV1	0.784208	6.84397	2292.78	0.000241444	0.00963453
ENSG00000091656.19	ZFHX4	-0.693364	5.62264	975.928	0.000241842	0.00963453
ENSG00000101210.13	EEF1A2	1.51864	4.76022	536.815	0.000250097	0.00991097
ENSG00000118523.6	CCN2	1.29849	10.4921	28572.3	0.000250813	0.00991097
ENSG00000164442.10	CITED2	-0.736577	7.92837	4803.69	0.00025728	0.0100908
ENSG00000142494.13	SLC47A1	-0.838621	3.45402	214.434	0.000257714	0.0100908
ENSG00000151892.14	GFRA1	-1.24096	5.00593	639.048	0.000257409	0.0100908
ENSG00000164211.13	STARD4	0.646574	5.9676	1238.37	0.000262622	0.0102518
ENSG00000167676.4	PLIN4	-1.63872	5.17289	705.29	0.000268042	0.0104318
ENSG00000135842.17	NIBAN1	-0.983005	7.62279	3888.04	0.000277092	0.0107515
ENSG00000138669.9	PRKG2	-1.69094	3.09434	165.9	0.00028039	0.0108468
ENSG00000125148.7	MT2A	1.31587	10.7818	35064.5	0.000284804	0.0108576
ENSG00000164761.9	TNFRSF11B	1.27969	2.75666	133.325	0.000285511	0.0108576
ENSG00000011422.12	PLAUR	1.13152	5.92336	1217.97	0.000284949	0.0108576
ENSG00000198467.16	TPM2	0.778641	11.7441	68138.7	0.000282129	0.0108576
ENSG00000106080.11	FKBP14	0.720088	5.88596	1178.58	0.00028303	0.0108576
ENSG00000143776.18	CDC42BPA	-0.436443	6.766	2152.79	0.000285923	0.0108576
ENSG00000057294.15	PKP2	-1.35836	4.56204	466.679	0.00028657	0.0108576
ENSG00000166473.17	PKD1L2	-1.75464	3.65138	244.874	0.000287537	0.0108623
ENSG00000114850.7	SSR3	0.956134	8.67439	8139.28	0.000289381	0.0109
ENSG00000055813.6	CCDC85A	2.37508	1.51739	57.3816	0.000293851	0.0110361
ENSG00000113389.16	NPR3	1.37451	4.9171	595.135	0.000296943	0.0110748
ENSG00000134259.5	NGF	0.963483	3.87456	290.691	0.00029746	0.0110748
ENSG00000014919.13	COX15	-0.536267	4.66522	500.348	0.000296823	0.0110748
ENSG00000183010.17	PYCR1	0.806091	6.21675	1480.25	0.000299057	0.0111022
ENSG00000244509.4	APOBEC3C	-0.500127	6.43084	1701.01	0.000301918	0.0111762
ENSG00000048052.21	HDAC9	-1.23795	3.39379	204.54	0.000305293	0.0112687
ENSG00000146072.6	TNFRSF21	0.726646	5.8895	1178.98	0.000306702	0.0112884
ENSG00000165023.7	DIRAS2	-2.90443	2.60469	119.458	0.00031272	0.0114771
ENSG00000119938.9	PPP1R3C	0.583715	7.81402	4460.76	0.000317397	0.0115642
ENSG00000173852.15	DPY19L1	0.520689	5.80954	1108.49	0.000317095	0.0115642
ENSG00000184584.13	STING1	-0.700887	6.07346	1332.06	0.000317787	0.0115642
ENSG00000105619.13	TFPT	0.668173	4.65721	495.729	0.000318892	0.0115717
ENSG00000183098.11	GPC6	-0.846188	3.39321	207.247	0.000322856	0.0116827
ENSG00000153048.11	CARHSP1	-0.491676	5.60882	962.536	0.000327586	0.0118206
ENSG00000160789.21	LMNA	-0.606009	9.89977	18886.3	0.000329171	0.0118446
ENSG00000168140.5	VASN	0.804925	7.47352	3522.32	0.000336509	0.0120645
ENSG00000135914.6	HTR2B	-2.60099	0.548335	28.6797	0.000337155	0.0120645
ENSG00000162849.16	KIF26B	1.06845	3.10081	170.09	0.000338625	0.0120836
ENSG00000107263.18	RAPGEF1	-0.515948	7.00886	2542.36	0.000341875	0.0121658
ENSG00000169239.13	CA5B	-0.70024	3.46291	217.607	0.000347752	0.0123409
ENSG00000049130.16	KITLG	-0.927314	6.75466	2151.68	0.000350522	0.012405
ENSG00000143850.16	PLEKHA6	-1.81703	1.06053	40.7252	0.000353051	0.0124603
ENSG00000175390.14	EIF3F	-0.445624	7.50932	3593.88	0.000355019	0.0124774
ENSG00000125375.16	DMAC2L	-0.651361	3.78721	271.873	0.000355473	0.0124774
ENSG00000063046.18	EIF4B	-0.768325	8.306	6223.54	0.000359623	0.0125887
ENSG00000145050.19	MANF	1.02006	6.42739	1715.72	0.000360801	0.0125958
ENSG00000108639.7	SYNGR2	0.630971	6.86689	2309.38	0.000365262	0.0126384
ENSG00000164930.12	FZD6	0.601701	6.58635	1901.73	0.00036575	0.0126384
ENSG00000173068.18	BNC2	-0.705183	4.63243	491.7	0.000363198	0.0126384
ENSG00000171408.14	PDE7B	-1.21626	3.74791	273.363	0.000365947	0.0126384
ENSG00000116679.16	IVNS1ABP	0.682284	6.36379	1635.27	0.000373524	0.0128656
ENSG00000128342.5	LIF	0.712249	7.74937	4273.54	0.000374805	0.0128753
ENSG00000159842.15	ABR	-0.591441	7.96956	4938.72	0.000378469	0.0129666
ENSG00000204262.14	COL5A2	0.718827	8.27064	6147.79	0.00038435	0.0130187
ENSG00000167797.8	CDK2AP2	0.695765	5.50846	903.571	0.000385042	0.0130187
ENSG00000122786.20	CALD1	0.679368	10.6803	32533.5	0.00038365	0.0130187
ENSG00000163644.15	PPM1K	-0.627507	5.61611	963.933	0.000384942	0.0130187
ENSG00000111052.7	LIN7A	-0.949516	3.5147	227.519	0.000381558	0.0130187
ENSG00000188064.10	WNT7B	1.78288	1.79616	69.851	0.000389086	0.0130193
ENSG00000163659.13	TIPARP	1.23254	5.68145	1018.86	0.000390479	0.0130193
ENSG00000051108.15	HERPUD1	0.790938	6.49771	1792.25	0.000389826	0.0130193
ENSG00000175854.13	SWI5	0.514913	5.00077	634.854	0.000390385	0.0130193
ENSG00000135744.8	AGT	-1.31704	2.8458	143.243	0.000391125	0.0130193
ENSG00000104722.14	NEFM	-1.81668	3.394	212.331	0.000388421	0.0130193
ENSG00000162631.18	NTNG1	1.19147	2.64167	124.083	0.000392376	0.0130273
ENSG00000204520.14	MICA	0.713202	7.16018	2821.52	0.000395634	0.0130681
ENSG00000068971.14	PPP2R5B	0.47758	5.91615	1194.81	0.00039474	0.0130681
ENSG00000116183.11	PAPPA2	1.847	2.43284	106.712	0.000407563	0.0134277
ENSG00000197182.14	MIRLET7BHG	0.872884	3.36544	203.355	0.000409464	0.0134559
ENSG00000135454.14	B4GALNT1	0.751949	3.87619	293.807	0.00041098	0.0134714
ENSG00000115806.13	GORASP2	0.459178	7.02657	2584.19	0.000413278	0.0134824
ENSG00000188613.7	NANOS1	-1.63242	1.17809	44.1438	0.00041341	0.0134824
ENSG00000124942.14	AHNAK	-0.373042	9.84808	18278.4	0.000441201	0.0143524
ENSG00000116132.12	PRRX1	-0.528443	8.57878	7565.45	0.000443399	0.0143876
ENSG00000120594.17	PLXDC2	2.05166	3.71364	260.829	0.000447432	0.014482
ENSG00000116649.10	SRM	0.483199	7.55206	3721.83	0.000465142	0.0149425
ENSG00000083720.13	OXCT1	-0.734879	6.51001	1795.26	0.000463587	0.0149425
ENSG00000166448.15	TMEM130	-1.35256	3.05781	163.885	0.000464189	0.0149425
ENSG00000225177.6	AL590617.2	0.922688	3.11933	173.551	0.000467133	0.0149692
ENSG00000112473.18	SLC39A7	0.496346	8.15172	5648.32	0.000468615	0.0149794
ENSG00000012171.20	SEMA3B	-1.08166	5.20347	726.447	0.000473597	0.0151012
ENSG00000166130.15	IKBIP	0.744481	6.34977	1621.8	0.000477348	0.0151715
ENSG00000166272.18	WBP1L	0.609707	6.47532	1763.83	0.000478156	0.0151715
ENSG00000115648.14	MLPH	-0.923749	5.76996	1066.01	0.00048073	0.0152157
ENSG00000070371.16	CLTCL1	0.648745	4.72518	522.511	0.000483682	0.0152715
ENSG00000198839.10	ZNF277	-0.775838	3.62822	243.849	0.000501271	0.0157538
ENSG00000172935.9	MRGPRF	-1.15406	5.95919	1229.54	0.000501403	0.0157538
ENSG00000019144.19	PHLDB1	0.897568	6.98651	2513.78	0.000504354	0.015808
ENSG00000269958.1	AL049840.6	0.756037	3.98968	313.919	0.000511029	0.0159757
ENSG00000152749.8	GPR180	0.67981	4.58436	476.069	0.000513889	0.0159757
ENSG00000147383.11	NSDHL	0.502504	5.94613	1217.9	0.000514663	0.0159757
ENSG00000091436.17	MAP3K20	-0.660987	7.64284	3919.47	0.000513238	0.0159757
ENSG00000138434.17	ITPRID2	0.576499	7.51881	3636.95	0.000519612	0.0160519
ENSG00000104332.12	SFRP1	-1.0518	6.28929	1560.08	0.000519434	0.0160519
ENSG00000038427.16	VCAN	3.05214	6.83646	2288.79	0.000525888	0.0162069
ENSG00000119714.11	GPR68	1.38284	3.50404	226.645	0.0005286	0.0162514
ENSG00000171928.14	TVP23B	0.523932	5.7405	1060.11	0.000530207	0.0162514
ENSG00000155158.20	TTC39B	-0.759976	4.14664	348.084	0.000531115	0.0162514
ENSG00000154556.18	SORBS2	-0.825584	6.11214	1354.62	0.000532887	0.016267
ENSG00000171617.14	ENC1	1.52536	6.0289	1311.97	0.000534964	0.0162917
ENSG00000113621.15	TXNDC15	0.42688	6.89513	2361.49	0.000545521	0.0165351
ENSG00000158292.7	GPR153	-1.04006	3.82585	279.742	0.000545432	0.0165351
ENSG00000086730.17	LAT2	1.47448	1.37638	51.5121	0.000555149	0.0167874
ENSG00000123610.5	TNFAIP6	2.11286	0.672375	31.6935	0.000561972	0.0169539
ENSG00000115875.19	SRSF7	-0.603067	6.41653	1679.69	0.000565101	0.0170085
ENSG00000048540.15	LMO3	-2.59173	0.649606	30.3593	0.000578398	0.0173681
ENSG00000130309.11	COLGALT1	0.407902	7.13002	2779.35	0.000586785	0.0175438
ENSG00000132589.16	FLOT2	-0.390229	7.02734	2576.68	0.000586973	0.0175438
ENSG00000106049.9	HIBADH	-0.642864	6.58867	1893.22	0.00059766	0.0178219
ENSG00000198948.12	MFAP3L	1.32815	3.34223	199.939	0.000606792	0.0180524
ENSG00000124783.14	SSR1	0.486262	7.42787	3422.94	0.000608717	0.018068
ENSG00000121281.13	ADCY7	1.50188	4.05491	332.753	0.000620403	0.0183358
ENSG00000148680.16	HTR7	1.41171	1.90296	74.6386	0.000620586	0.0183358
ENSG00000175166.17	PSMD2	0.88117	9.42362	13603.3	0.000624665	0.018414
ENSG00000013297.12	CLDN11	-1.45158	5.45749	874.616	0.000636748	0.0187274
ENSG00000148677.7	ANKRD1	4.66024	6.04263	1291.59	0.000638807	0.0187451
ENSG00000143416.21	SELENBP1	-1.0283	4.4372	426.414	0.00064972	0.019022
ENSG00000214193.11	SH3D21	0.624807	3.74275	265.86	0.000662858	0.0193512
ENSG00000162542.13	TMCO4	-0.678108	3.93318	300.705	0.000663966	0.0193512
ENSG00000213626.13	LBH	0.969786	6.3993	1675.39	0.000669268	0.0194616
ENSG00000171823.7	FBXL14	-0.901941	3.41328	211.371	0.000680535	0.0197447
ENSG00000112210.12	RAB23	-0.551228	5.55797	932.467	0.000683845	0.0197729
ENSG00000164237.9	CMBL	-0.552989	5.73552	1049.72	0.000684577	0.0197729
ENSG00000162368.13	CMPK1	0.506052	7.60307	3852.45	0.000701748	0.0201784
ENSG00000107317.13	PTGDS	-1.88886	3.68273	253.13	0.000700382	0.0201784
ENSG00000070756.16	PABPC1	-0.383035	9.91044	18981.6	0.000703443	0.0201821
ENSG00000198932.13	GPRASP1	-1.22542	3.56	231.683	0.00070936	0.0203066
ENSG00000122707.12	RECK	0.523464	6.82702	2263.56	0.000710961	0.0203073
ENSG00000166562.9	SEC11C	0.794983	5.8003	1105.25	0.000715048	0.0203789
ENSG00000164294.14	GPX8	0.513267	6.90438	2382.11	0.000719078	0.0204485
ENSG00000079482.13	OPHN1	-0.78108	2.99149	156.67	0.000724472	0.0205402
ENSG00000143772.9	ITPKB	-1.17459	7.1472	2780.61	0.000725492	0.0205402
ENSG00000183876.9	ARSI	0.939543	4.83575	564.095	0.000733039	0.0207083
ENSG00000082458.12	DLG3	-0.759749	4.22236	370.078	0.000744838	0.0209956
ENSG00000168952.15	STXBP6	-1.05235	3.74018	261.992	0.00074895	0.0210655
ENSG00000250510.8	GPR162	-1.71583	1.85776	71.1503	0.000753448	0.0211458
ENSG00000087253.13	LPCAT2	0.892102	5.23071	749.403	0.000758061	0.021229
ENSG00000073921.18	PICALM	0.629401	8.40375	6719.4	0.000763728	0.0213413
ENSG00000164171.11	ITGA2	1.02092	6.33373	1616.42	0.000765786	0.0213525
ENSG00000188643.11	S100A16	0.60474	7.87071	4661.72	0.000785047	0.0218045
ENSG00000109089.7	CDR2L	0.583965	6.04581	1312.65	0.00078704	0.0218045
ENSG00000168938.6	PPIC	0.493982	4.77254	542.002	0.000787075	0.0218045
ENSG00000143891.17	GALM	-0.753966	3.93201	299.906	0.000812582	0.0224628
ENSG00000152952.12	PLOD2	0.99992	8.89294	9495.39	0.000814427	0.0224656
ENSG00000132359.15	RAP1GAP2	1.82211	1.54139	56.7673	0.000816421	0.0224725
ENSG00000171680.23	PLEKHG5	0.541936	5.96872	1248.09	0.000821009	0.0225506
ENSG00000184524.6	CEND1	-1.01078	3.50853	223.92	0.000825615	0.0226289
ENSG00000137145.20	DENND4C	-0.497455	4.77347	539.171	0.000832218	0.0227614
ENSG00000139910.20	NOVA1	-0.900811	3.68512	255.123	0.000837781	0.022865
ENSG00000172731.14	LRRC20	-0.92011	4.44942	429.963	0.000842459	0.0228957
ENSG00000111058.8	ACSS3	-0.929614	4.30737	389.749	0.000841665	0.0228957
ENSG00000101294.18	HM13	0.508877	7.96404	4954.9	0.000847676	0.022989
ENSG00000198732.11	SMOC1	1.08681	3.24476	187.188	0.00085217	0.0230623
ENSG00000157214.14	STEAP2	-0.91089	3.15231	176.806	0.000869876	0.0234921
ENSG00000113494.17	PRLR	-1.75362	0.417097	26.1889	0.000871764	0.0234939
ENSG00000105655.19	ISYNA1	-1.08278	5.89247	1169.93	0.000873785	0.0234992
ENSG00000262879.6	AC005670.3	-0.524173	5.15054	697.838	0.000877709	0.0235555
ENSG00000149131.16	SERPING1	-1.068	4.98723	615.7	0.000893177	0.0239208
ENSG00000105559.12	PLEKHA4	-1.09664	5.30164	785.62	0.000896081	0.0239488
ENSG00000105514.8	RAB3D	-0.66585	3.18145	179.45	0.000902081	0.0240592
ENSG00000151692.15	RNF144A	-1.00846	4.15923	356.69	0.000904472	0.0240732
ENSG00000197019.5	SERTAD1	0.787732	4.52174	455.195	0.000915254	0.0243099
ENSG00000116396.15	KCNC4	0.703305	5.12805	689.707	0.000966376	0.0256149
ENSG00000167657.14	DAPK3	0.494095	7.78664	4373.09	0.000969957	0.0256571
ENSG00000148516.21	ZEB1	-0.41555	5.78445	1090.89	0.000973534	0.0256989
ENSG00000155304.6	HSPA13	0.561493	5.76446	1077.57	0.000982863	0.0258921
ENSG00000185305.11	ARL15	0.714619	3.77329	270.454	0.000995514	0.0261186
ENSG00000089041.17	P2RX7	-1.41056	1.25535	46.6011	0.000994461	0.0261186
ENSG00000113739.10	STC2	1.15671	10.3178	25155.4	0.00100611	0.026343
ENSG00000172375.13	C2CD2L	0.679759	4.39185	415.6	0.00101939	0.0266365
ENSG00000175084.12	DES	-2.00362	3.89221	293.914	0.00102661	0.026771
ENSG00000204160.12	ZDHHC18	0.570298	5.57646	945.885	0.0010291	0.0267816
ENSG00000113083.14	LOX	1.17007	9.7953	17799.7	0.00104249	0.0270208
ENSG00000178035.12	IMPDH2	-0.395467	6.69121	2039.08	0.00104197	0.0270208
ENSG00000156265.16	MAP3K7CL	1.22412	1.50586	56.3939	0.00105165	0.0272035
ENSG00000077147.16	TM9SF3	0.454447	8.11179	5484.45	0.00107378	0.0276649
ENSG00000112699.11	GMDS	-0.70756	5.34249	805.816	0.00107237	0.0276649
ENSG00000187231.14	SESTD1	-0.847862	5.35735	806.408	0.00110086	0.028306
ENSG00000273301.1	AC016717.2	3.51016	3.4511	213.521	0.00110932	0.0284666
ENSG00000138829.12	FBN2	1.30216	5.67651	1020.96	0.00111606	0.0285258
ENSG00000133872.14	SARAF	0.426928	7.91796	4786.7	0.00111524	0.0285258
ENSG00000197208.6	SLC22A4	0.947032	2.26833	95.8091	0.00111885	0.0285406
ENSG00000172340.15	SUCLG2	-0.513275	5.74244	1054.64	0.00112367	0.0286071
ENSG00000113361.13	CDH6	0.7663	8.2314	5960.42	0.00114012	0.0289684
ENSG00000122861.16	PLAU	1.01568	5.68545	1018.74	0.00115063	0.0291781
ENSG00000137449.16	CPEB2	-0.495734	5.46859	876.026	0.00116981	0.0295481
ENSG00000168646.13	AXIN2	-1.28486	2.30407	97.2278	0.00116941	0.0295481
ENSG00000118600.12	RXYLT1	0.578763	3.80905	277.09	0.00119153	0.0297616
ENSG00000259207.9	ITGB3	0.470202	6.06325	1322.53	0.00118162	0.0297616
ENSG00000126903.16	SLC10A3	0.390773	6.27556	1535.71	0.00119213	0.0297616
ENSG00000136531.18	SCN2A	-0.787955	4.25705	377.305	0.00119077	0.0297616
ENSG00000166831.9	RBPMS2	-1.11092	3.13998	173.022	0.00118839	0.0297616
ENSG00000109819.9	PPARGC1A	-1.54143	2.74679	130.402	0.00118995	0.0297616
ENSG00000143515.18	ATP8B2	-0.595843	7.82571	4489.2	0.00119761	0.0298405
ENSG00000103811.17	CTSH	-0.7326	4.61238	477.708	0.00120224	0.0298405
ENSG00000137501.17	SYTL2	-0.9486	3.48859	219.357	0.00120096	0.0298405
ENSG00000115641.19	FHL2	0.720942	7.42568	3422.88	0.0012075	0.0298683
ENSG00000156642.17	NPTN	0.568427	8.07389	5349.59	0.00121263	0.0298683
ENSG00000106638.17	TBL2	0.485981	5.50507	900.479	0.00120918	0.0298683
ENSG00000204264.12	PSMB8	-0.698901	4.99175	627.92	0.00121102	0.0298683
ENSG00000186340.15	THBS2	-1.22029	8.01858	5102.14	0.00121581	0.0298893
ENSG00000165959.12	CLMN	-1.05458	3.87955	289.737	0.00122074	0.0299534
ENSG00000109929.10	SC5D	0.732776	6.77191	2162.08	0.0012279	0.0300718
ENSG00000174132.9	FAM174A	0.66085	4.90325	593.652	0.00123041	0.0300763
ENSG00000182667.14	NTM	1.69106	3.88057	297.028	0.00125014	0.0302713
ENSG00000076554.15	TPD52	0.849136	3.69252	255.146	0.00124529	0.0302713
ENSG00000160949.17	TONSL	0.446472	4.90396	592.379	0.00124587	0.0302713
ENSG00000168807.16	SNTB2	-0.438193	6.08131	1340.92	0.00124792	0.0302713
ENSG00000148344.11	PTGES	-0.829031	4.37071	402.484	0.00124541	0.0302713
ENSG00000164733.21	CTSB	-0.56246	11.1075	43895.5	0.00125431	0.0303153
ENSG00000114745.13	GORASP1	0.493758	5.7544	1067.97	0.00125984	0.0303918
ENSG00000169047.5	IRS1	-0.596243	6.2715	1528.21	0.00126726	0.0305138
ENSG00000128564.7	VGF	2.40681	1.97747	78.9068	0.00127203	0.0305714
ENSG00000116667.15	C1orf21	-0.525734	6.12207	1376.06	0.00129636	0.031098
ENSG00000122641.11	INHBA	0.829997	5.46977	880.485	0.00130161	0.0311661
ENSG00000165661.17	QSOX2	0.545539	4.80696	557.962	0.00131226	0.0313047
ENSG00000007944.15	MYLIP	-1.25072	3.53551	227.197	0.00131086	0.0313047
ENSG00000143367.16	TUFT1	1.0212	5.51883	901.874	0.00132932	0.0316531
ENSG00000134013.16	LOXL2	1.34396	8.91229	9560.88	0.00133754	0.0317901
ENSG00000144677.15	CTDSPL	-0.558996	4.77192	538.798	0.00134009	0.031792
ENSG00000011201.12	ANOS1	1.33598	3.49441	222.756	0.00134577	0.031868
ENSG00000144712.12	CAND2	-1.23661	3.96483	306.785	0.00135188	0.031954
ENSG00000117643.14	MAN1C1	-1.08171	6.22244	1475.65	0.00135521	0.0319739
ENSG00000240583.13	AQP1	1.77425	4.26295	380.222	0.00139821	0.0327391
ENSG00000101972.19	STAG2	-0.494153	5.43778	855.571	0.00139363	0.0327391
ENSG00000166073.11	GPR176	-0.513965	6.00438	1265.41	0.00140034	0.0327391
ENSG00000157399.16	ARSL	-0.782383	3.03606	161.426	0.00139156	0.0327391
ENSG00000145687.16	SSBP2	-0.807072	4.20944	363.175	0.00139827	0.0327391
ENSG00000235162.9	C12orf75	0.837029	8.39842	6707.95	0.00141106	0.0329299
ENSG00000100321.15	SYNGR1	-0.564334	6.94732	2440.16	0.00141713	0.0329522
ENSG00000197291.9	RAMP2-AS1	-2.55739	1.54055	57.1206	0.00141548	0.0329522
ENSG00000204634.12	TBC1D8	-1.29294	2.77101	134.289	0.00142275	0.0330231
ENSG00000162426.15	SLC45A1	-0.768946	2.61775	121.041	0.00143784	0.0333134
ENSG00000151617.17	EDNRA	-0.764206	5.2476	755.34	0.0014485	0.0335001
ENSG00000143669.14	LYST	-0.958023	5.3983	826.377	0.00146058	0.0336587
ENSG00000106823.12	ECM2	-1.25965	2.56526	116.665	0.00145798	0.0336587
ENSG00000163328.13	GPR155	0.755397	4.38327	413.109	0.00147546	0.0338201
ENSG00000144645.14	OSBPL10	0.55476	4.85085	571.858	0.00147436	0.0338201
ENSG00000133026.13	MYH10	-0.544106	7.28188	3071.76	0.00147396	0.0338201
ENSG00000137267.6	TUBB2A	1.07781	6.86474	2331.33	0.00148447	0.0339661
ENSG00000275832.5	ARHGAP23	-0.421829	7.0931	2713.69	0.0014924	0.0340267
ENSG00000165379.13	LRFN5	-1.27632	2.44721	108.098	0.00149111	0.0340267
ENSG00000004776.13	HSPB6	-0.637626	8.61552	7757.85	0.00150755	0.0342975
ENSG00000111262.6	KCNA1	-1.20935	2.66555	127.518	0.0015096	0.0342975
ENSG00000101665.9	SMAD7	1.29194	5.07404	667.744	0.0015132	0.0343188
ENSG00000240694.9	PNMA2	-0.760022	4.84804	567.185	0.00151766	0.0343595
ENSG00000159176.14	CSRP1	0.805275	9.02164	10320.8	0.00152493	0.0344635
ENSG00000185630.19	PBX1	-0.694934	5.47005	875.073	0.00152991	0.0345155
ENSG00000095752.7	IL11	2.91287	4.75333	538.842	0.00153288	0.034522
ENSG00000151320.11	AKAP6	-1.26111	3.43794	210.484	0.00153902	0.0345997
ENSG00000177469.13	CAVIN1	0.524728	11.0255	41404.1	0.00154265	0.034621
ENSG00000005238.20	FAM214B	0.59179	7.06617	2654.97	0.00154752	0.0346699
ENSG00000185585.20	OLFML2A	-2.30938	6.01646	1273.53	0.00155137	0.0346957
ENSG00000110881.12	ASIC1	-0.858762	3.81245	278.711	0.00156972	0.0349847
ENSG00000251003.9	ZFPM2-AS1	-1.87457	3.35053	199.894	0.00156795	0.0349847
ENSG00000100219.16	XBP1	0.625931	6.39024	1664.94	0.00159554	0.0354987
ENSG00000105825.14	TFPI2	1.05594	6.42268	1709.35	0.00160272	0.0355172
ENSG00000134851.13	TMEM165	0.725833	7.23426	2988.87	0.00161023	0.0355172
ENSG00000009830.12	POMT2	0.595052	5.18038	718.388	0.00160562	0.0355172
ENSG00000118762.8	PKD2	-0.61689	7.47502	3483.76	0.00161775	0.0355172
ENSG00000130702.15	LAMA5	-0.724691	8.17411	5701.03	0.00161008	0.0355172
ENSG00000179604.10	CDC42EP4	-0.728607	5.50832	899.547	0.00162392	0.0355172
ENSG00000170873.19	MTSS1	-0.775956	3.56824	235.165	0.00161796	0.0355172
ENSG00000169946.14	ZFPM2	-1.06339	3.2799	192.48	0.00161685	0.0355172
ENSG00000146411.6	SLC2A12	-1.2416	3.82585	279.816	0.00161972	0.0355172
ENSG00000102057.10	KCND1	-1.25086	2.92718	150.505	0.00162394	0.0355172
ENSG00000169359.16	SLC33A1	0.585894	4.74293	529.662	0.00163161	0.0356243
ENSG00000106333.13	PCOLCE	-1.36425	7.19472	2896.35	0.00163543	0.0356382
ENSG00000196155.13	PLEKHG4	-1.65424	4.65357	501.99	0.00163778	0.0356382
ENSG00000049192.15	ADAMTS6	1.37006	3.89533	297.121	0.00165896	0.0360383
ENSG00000054654.19	SYNE2	-0.697188	3.97655	310.314	0.00167391	0.03618
ENSG00000138606.19	SHF	-1.68344	1.96976	77.588	0.00166957	0.03618
ENSG00000267339.7	LINC00906	-1.78151	1.08982	40.8537	0.00167157	0.03618
ENSG00000095637.22	SORBS1	-0.571422	5.86727	1148.04	0.00168851	0.0364345
ENSG00000162734.13	PEA15	0.757544	10.3738	26205.9	0.0017044	0.0367157
ENSG00000107281.10	NPDC1	0.337244	7.4822	3546.09	0.00171657	0.0369164
ENSG00000125968.9	ID1	1.1167	4.92532	604.28	0.00173921	0.0372168
ENSG00000183087.15	GAS6	0.7328	9.13502	11178	0.00173734	0.0372168
ENSG00000239268.3	AC092691.1	-1.048	2.10184	84.9179	0.00173861	0.0372168
ENSG00000042832.12	TG	0.84547	2.38278	103.349	0.00174512	0.0372814
ENSG00000140497.16	SCAMP2	0.412967	6.64788	1984.12	0.00174993	0.0373222
ENSG00000196782.12	MAML3	-1.28053	2.70139	128.269	0.00177845	0.0378679
ENSG00000112096.19	SOD2	-1.15301	8.41024	6604.99	0.00179374	0.0381303
ENSG00000131844.16	MCCC2	-0.44684	5.28232	767.459	0.00180228	0.0382487
ENSG00000222041.11	CYTOR	0.992185	5.45534	868.84	0.00182302	0.0386253
ENSG00000072163.20	LIMS2	0.728328	6.14627	1401.04	0.00183208	0.0387535
ENSG00000104490.18	NCALD	-1.22742	1.68594	64.4083	0.00183804	0.0388157
ENSG00000136167.15	LCP1	2.02759	3.64562	246.645	0.00184736	0.0389488
ENSG00000030419.16	IKZF2	-0.866454	2.14987	88.2141	0.0018675	0.0393091
ENSG00000165030.4	NFIL3	-0.906739	3.27091	189.873	0.00187449	0.0393845
ENSG00000253304.2	TMEM200B	-1.01298	3.99825	314.337	0.0018772	0.0393845
ENSG00000147100.11	SLC16A2	0.62361	7.47304	3514.31	0.00190273	0.0398552
ENSG00000146374.14	RSPO3	-1.76746	1.08669	41.4844	0.00192831	0.0403255
ENSG00000169583.13	CLIC3	1.7788	3.4615	216.436	0.00195349	0.0406607
ENSG00000149428.19	HYOU1	0.774585	7.6955	4121.7	0.00195556	0.0406607
ENSG00000065600.13	PACC1	0.576303	3.66501	251.835	0.00195712	0.0406607
ENSG00000149257.16	SERPINH1	0.511373	8.33702	6432.7	0.00196012	0.0406607
ENSG00000156804.7	FBXO32	-1.06051	8.24361	5891.28	0.00195258	0.0406607
ENSG00000155850.8	SLC26A2	0.784479	5.10216	681.401	0.00196764	0.0406856
ENSG00000122417.15	ODF2L	0.674478	4.52807	458.691	0.00196756	0.0406856
ENSG00000100558.9	PLEK2	1.26815	1.22585	46.4327	0.00197652	0.0408037
ENSG00000143409.15	MINDY1	-0.486801	4.5516	464.208	0.00198	0.0408102
ENSG00000150630.4	VEGFC	1.09876	4.0302	326.615	0.00200408	0.0411819
ENSG00000139625.13	MAP3K12	-0.776593	5.38592	825.49	0.00200443	0.0411819
ENSG00000180739.14	S1PR5	2.37843	1.08939	41.8935	0.00204817	0.0420136
ENSG00000136869.16	TLR4	0.788893	6.6987	2051.88	0.00206092	0.0420742
ENSG00000187244.12	BCAM	-0.818326	7.26716	3031.99	0.00205996	0.0420742
ENSG00000167992.13	VWCE	-1.30576	3.3	193.372	0.00205826	0.0420742
ENSG00000140941.14	MAP1LC3B	0.43975	8.27148	6118.14	0.00206941	0.0421186
ENSG00000188177.14	ZC3H6	-0.853316	2.64104	122.933	0.00206964	0.0421186
ENSG00000273802.2	H2BC8	1.60587	2.43775	106.979	0.00207998	0.0422624
ENSG00000204219.11	TCEA3	-1.23706	4.03341	322.927	0.00210752	0.0427545
ENSG00000135318.12	NT5E	0.557526	8.70353	8339.29	0.00211515	0.0427745
ENSG00000136114.17	THSD1	-0.892807	2.21938	91.8266	0.00211281	0.0427745
ENSG00000166340.17	TPP1	-0.534301	8.05492	5232.4	0.00214147	0.043239
ENSG00000164904.18	ALDH7A1	-0.432135	5.86423	1149.03	0.00216129	0.043555
ENSG00000138162.19	TACC2	-0.65169	5.39346	825.377	0.00216389	0.043555
ENSG00000133812.16	SBF2	-0.598603	4.67524	504.333	0.00216808	0.0435713
ENSG00000090861.17	AARS1	-0.429067	7.7845	4343.55	0.00219594	0.0440625
ENSG00000184988.8	TMEM106A	1.25385	4.01193	323.659	0.00222557	0.0445876
ENSG00000174695.10	TMEM167A	0.580934	6.55006	1859.1	0.00223219	0.0446508
ENSG00000155760.2	FZD7	0.883486	6.25689	1524.77	0.0022478	0.0448933
ENSG00000054967.13	RELT	0.87075	2.13387	87.3766	0.00225676	0.0450024
ENSG00000260910.2	LINC00565	1.41331	1.87476	73.7907	0.00228881	0.0455006
ENSG00000197971.16	MBP	-0.718747	3.47139	217.243	0.00228544	0.0455006
ENSG00000137207.12	YIPF3	0.360292	7.51811	3639.33	0.00230965	0.0458442
ENSG00000161281.11	COX7A1	0.533291	5.96695	1234.19	0.00232051	0.045989
ENSG00000181830.9	SLC35C1	0.512468	6.00166	1273.28	0.00232948	0.046025
ENSG00000111962.8	UST	-0.685592	6.30607	1557.7	0.00232719	0.046025
ENSG00000172831.14	CES2	-0.528018	6.15544	1405.37	0.00233836	0.0461297
ENSG00000147010.18	SH3KBP1	0.657608	6.29393	1568.63	0.00234771	0.0462435
ENSG00000166002.7	SMCO4	0.763463	3.23374	185.696	0.00235665	0.0463487
ENSG00000162729.14	IGSF8	0.521684	6.47964	1767.72	0.0023619	0.0463811
ENSG00000158716.9	DUSP23	0.730527	4.74142	529.308	0.00239003	0.0464357
ENSG00000133816.16	MICAL2	0.724731	7.1471	2817.77	0.00239352	0.0464357
ENSG00000162642.14	C1orf52	0.576941	4.16762	356.638	0.00239159	0.0464357
ENSG00000196937.11	FAM3C	0.564786	6.96992	2487.25	0.00239283	0.0464357
ENSG00000117410.14	ATP6V0B	0.562718	7.31348	3154.1	0.0023822	0.0464357
ENSG00000083457.12	ITGAE	0.490986	4.46696	438.047	0.00237045	0.0464357
ENSG00000116221.15	MRPL37	0.473123	6.87326	2321.46	0.00237958	0.0464357
ENSG00000124574.15	ABCC10	0.409684	5.3571	812.112	0.00238929	0.0464357
ENSG00000159164.10	SV2A	-0.671819	5.80648	1102.71	0.00240425	0.0465737
ENSG00000104388.15	RAB2A	0.33657	7.3504	3234.22	0.00240848	0.0465856
ENSG00000101849.17	TBL1X	-0.578696	5.24713	746.63	0.00243891	0.0471034
ENSG00000129562.11	DAD1	0.438546	7.80137	4424.24	0.00244508	0.047152
ENSG00000136717.15	BIN1	-0.542523	6.70799	2051.64	0.00245744	0.0473085
ENSG00000196177.13	ACADSB	-0.573214	4.20506	365.423	0.00246054	0.0473085
ENSG00000108829.10	LRRC59	0.579789	6.88436	2348.14	0.00249591	0.0479169
ENSG00000025423.11	HSD17B6	0.907432	4.8842	580.564	0.00250005	0.0479251
ENSG00000162688.17	AGL	-0.469042	5.00914	635.165	0.00250735	0.0479935
ENSG00000136383.7	ALPK3	0.93092	3.8689	286.322	0.00251147	0.0479983
ENSG00000164484.12	TMEM200A	0.516966	7.47216	3525.08	0.00251505	0.0479983
ENSG00000254858.10	MPV17L2	0.574784	4.61293	484.703	0.0025325	0.0482598
ENSG00000163207.7	IVL	3.54521	2.91296	148.581	0.0025575	0.0485549
ENSG00000090520.11	DNAJB11	0.766745	5.25107	758.065	0.00255691	0.0485549
ENSG00000100307.13	CBX7	-0.634514	4.82299	555.981	0.00255929	0.0485549
ENSG00000183775.11	KCTD16	1.23183	2.92479	150.57	0.00256856	0.048659
ENSG00000184160.8	ADRA2C	1.84727	1.01159	39.4517	0.00259596	0.0489964
ENSG00000136026.14	CKAP4	0.580602	9.29161	12511.6	0.00259423	0.0489964
ENSG00000168386.18	FILIP1L	-0.891399	5.14161	694.765	0.00259777	0.0489964
ENSG00000187837.4	H1-2	0.653079	5.90816	1182.91	0.00260626	0.0490129
ENSG00000242498.8	ARPIN	-0.693202	4.34247	399.704	0.00260592	0.0490129
ENSG00000100105.18	PATZ1	-0.643255	3.9521	305.118	0.00261458	0.0490978
ENSG00000164116.17	GUCY1A1	-1.11611	7.63278	3911.46	0.00262323	0.0491885
ENSG00000090339.9	ICAM1	-1.02353	4.912	592.829	0.00263053	0.0492537
ENSG00000198517.10	MAFK	0.435908	6.15688	1408.04	0.00265956	0.0497249
ENSG00000257219.6	LNCOG	1.31238	3.63285	249.23	0.00269411	0.0502979
ENSG00000112763.17	BTN2A1	0.653184	4.97034	622.436	0.00271894	0.0503962
ENSG00000127526.15	SLC35E1	0.458198	6.73665	2113.02	0.00270904	0.0503962
ENSG00000198270.13	TMEM116	-0.852867	2.65037	123.311	0.00271428	0.0503962
ENSG00000158270.12	COLEC12	-1.07017	3.91552	302.172	0.00270364	0.0503962
ENSG00000011347.10	SYT7	-1.14909	1.97345	77.0041	0.0027188	0.0503962
ENSG00000115828.17	QPCT	0.653449	4.91312	595.216	0.00277035	0.0511632
ENSG00000154822.18	PLCL2	-0.593837	3.53312	228.078	0.00277621	0.0511632
ENSG00000163596.16	ICA1L	-0.680191	3.1508	174.84	0.002776	0.0511632
ENSG00000148541.13	FAM13C	-1.09995	3.34602	200.12	0.00277089	0.0511632
ENSG00000175416.15	CLTB	0.404249	7.39915	3338.72	0.00278066	0.0511721
ENSG00000148798.11	INA	1.38668	1.64686	62.0291	0.00280482	0.0514696
ENSG00000146112.12	PPP1R18	0.419206	7.66625	4032.69	0.00280462	0.0514696
ENSG00000105928.16	GSDME	-0.536211	5.87954	1158.64	0.00282072	0.0515915
ENSG00000179627.10	ZBTB42	-0.729264	2.8094	138.118	0.00282348	0.0515915
ENSG00000153993.13	SEMA3D	-0.855953	2.44012	107.621	0.0028185	0.0515915
ENSG00000166483.11	WEE1	-0.426486	5.71283	1031.26	0.00283257	0.0516334
ENSG00000144366.16	GULP1	-0.686633	3.68887	253.726	0.00283379	0.0516334
ENSG00000033170.17	FUT8	0.666594	5.11757	689.261	0.00287634	0.0522981
ENSG00000134352.20	IL6ST	0.640588	8.50635	7227.76	0.00287839	0.0522981
ENSG00000158406.5	H4C8	0.890732	4.44206	428.538	0.00289484	0.0523306
ENSG00000111859.17	NEDD9	0.819664	4.35901	402.615	0.00289933	0.0523306
ENSG00000173598.14	NUDT4	0.585985	7.62814	3911.79	0.00289811	0.0523306
ENSG00000165915.14	SLC39A13	0.400267	7.59546	3829.96	0.00290909	0.0523306
ENSG00000196914.9	ARHGEF12	-0.4064	7.17452	2848.99	0.0029096	0.0523306
ENSG00000135677.11	GNS	-0.437643	8.80539	8809.38	0.00290368	0.0523306
ENSG00000079691.18	CARMIL1	-0.60054	3.76865	270.79	0.0028884	0.0523306
ENSG00000204131.9	NHSL2	-0.835299	4.5325	457.18	0.00291267	0.0523306
ENSG00000174807.4	CD248	-0.883028	6.5797	1907.33	0.00291999	0.0523891
ENSG00000151240.17	DIP2C	-0.426903	6.05692	1311.17	0.00293146	0.0525217
ENSG00000151327.12	FAM177A1	0.446714	6.48305	1773.97	0.00295996	0.0529586
ENSG00000104313.20	EYA1	-1.67093	1.65406	61.8775	0.00296705	0.0530118
ENSG00000198856.13	OSTC	0.570023	7.02335	2585.27	0.00300345	0.0535137
ENSG00000178078.12	STAP2	-1.36755	2.09451	85.2971	0.00300306	0.0535137
ENSG00000091137.14	SLC26A4	-2.11321	1.77176	68.2251	0.00303046	0.0539204
ENSG00000185803.12	SLC52A2	0.45274	6.12518	1385.13	0.0030416	0.0540441
ENSG00000068028.17	RASSF1	0.43338	5.19485	725.462	0.00306947	0.0544641
ENSG00000119185.13	ITGB1BP1	0.36612	5.98213	1255.77	0.00309236	0.0547195
ENSG00000139289.13	PHLDA1	-0.853406	8.13452	5565.35	0.00309179	0.0547195
ENSG00000129467.13	ADCY4	2.04592	0.486801	27.6093	0.00309852	0.0547398
ENSG00000164080.13	RAD54L2	-0.459958	4.47861	439.844	0.00310201	0.0547398
ENSG00000155897.10	ADCY8	-1.57415	1.39791	51.6401	0.00310684	0.0547501
ENSG00000180801.14	ARSJ	-0.757132	6.10452	1366.04	0.00316449	0.0556898
ENSG00000176641.11	RNF152	1.33493	3.26787	192.741	0.00317668	0.0557933
ENSG00000254122.3	PCDHGB7	-0.872241	4.2455	375.462	0.00317903	0.0557933
ENSG00000282057.1	AC092807.4	1.1415	2.14431	87.6571	0.00322994	0.0565244
ENSG00000184216.14	IRAK1	0.445996	8.71308	8297.96	0.0032332	0.0565244
ENSG00000100490.9	CDKL1	-0.948895	3.59925	237.693	0.00323385	0.0565244
ENSG00000173905.9	GOLIM4	0.382578	6.86927	2321.13	0.003253	0.0567051
ENSG00000140848.17	CPNE2	-0.508705	4.82459	560.013	0.00325153	0.0567051
ENSG00000064651.14	SLC12A2	-0.569053	5.80861	1114.42	0.00327162	0.0569527
ENSG00000156521.14	TYSND1	-0.630054	4.30485	388.682	0.00327853	0.0569961
ENSG00000153823.19	PID1	0.757567	4.79492	547.775	0.00331828	0.0571647
ENSG00000152894.14	PTPRK	0.642016	6.4049	1677.89	0.00330191	0.0571647
ENSG00000132963.8	POMP	0.39165	7.09181	2705.03	0.00331787	0.0571647
ENSG00000184792.16	OSBP2	-0.56771	3.36687	203.111	0.00330964	0.0571647
ENSG00000139174.12	PRICKLE1	-0.808466	2.68145	127.042	0.0033193	0.0571647
ENSG00000187210.14	GCNT1	-0.94852	4.56175	468.394	0.00331032	0.0571647
ENSG00000243742.5	RPLP0P2	-1.31473	2.83936	143.032	0.00330651	0.0571647
ENSG00000240065.8	PSMB9	-1.3164	2.8122	139.079	0.00335705	0.0577378
ENSG00000171067.11	C11orf24	0.46631	6.48228	1773.68	0.00338645	0.0581338
ENSG00000133048.13	CHI3L1	-2.55674	7.46621	3653.67	0.0033891	0.0581338
ENSG00000136068.15	FLNB	0.643346	7.21577	2918.71	0.00340374	0.0583072
ENSG00000163430.12	FSTL1	0.657071	9.23509	11967.3	0.00342966	0.0585232
ENSG00000142657.21	PGD	-0.880689	8.93853	9653.3	0.00342998	0.0585232
ENSG00000241935.9	HOGA1	-1.46675	0.985127	38.1221	0.00342939	0.0585232
ENSG00000169554.22	ZEB2	-0.491224	5.70931	1030.8	0.00344436	0.0586908
ENSG00000186174.12	BCL9L	0.489022	7.18004	2870.34	0.00344915	0.0586948
ENSG00000137801.11	THBS1	1.98584	8.88252	9370.03	0.00346509	0.058858
ENSG00000198934.5	MAGEE1	-0.586527	3.50516	224.019	0.00346788	0.058858
ENSG00000114354.15	TFG	0.34389	7.01343	2566.56	0.00347433	0.0588899
ENSG00000158806.14	NPM2	-1.7429	1.26738	47.0737	0.00352656	0.0596966
ENSG00000136859.10	ANGPTL2	-0.766616	6.0602	1313.76	0.00353127	0.0596979
ENSG00000182240.16	BACE2	-0.478563	7.27861	3051.51	0.00354581	0.0598652
ENSG00000142871.18	CCN1	0.662472	8.90411	9469.81	0.00355302	0.0599083
ENSG00000168273.8	SMIM4	0.727471	4.00206	316.936	0.00356767	0.0600768
ENSG00000270885.2	RASL10B	-0.68073	4.28239	382.35	0.00359726	0.060496
ENSG00000114268.12	PFKFB4	0.632093	3.58041	236.956	0.00363932	0.0609646
ENSG00000139613.12	SMARCC2	-0.458413	6.2378	1490.37	0.00363755	0.0609646
ENSG00000131374.14	TBC1D5	-0.550213	5.90058	1175.93	0.00363576	0.0609646
ENSG00000162298.19	SYVN1	0.38751	5.92257	1201.62	0.00366758	0.0611992
ENSG00000149782.12	PLCB3	0.377625	6.51645	1813.83	0.0036587	0.0611992
ENSG00000069275.13	NUCKS1	-0.356837	7.59129	3811.92	0.00366373	0.0611992
ENSG00000232679.2	LINC01705	1.47615	4.47932	445.102	0.0037039	0.0616501
ENSG00000116209.12	TMEM59	0.308095	8.31269	6282.96	0.00370877	0.0616501
ENSG00000105855.10	ITGB8	-1.50218	2.46737	109.488	0.00370896	0.0616501
ENSG00000197119.13	SLC25A29	-0.662306	5.41173	839.026	0.0037183	0.0617258
ENSG00000231672.8	DIRC3	1.14047	1.8634	71.5857	0.00374038	0.0619326
ENSG00000165124.18	SVEP1	-0.729161	4.75952	539.073	0.00373861	0.0619326
ENSG00000122863.6	CHST3	0.460805	6.17331	1429.77	0.00374791	0.0619777
ENSG00000120549.18	KIAA1217	-0.824537	6.04818	1304.84	0.0037782	0.0623984
ENSG00000136240.10	KDELR2	0.466857	7.88511	4701.99	0.00379795	0.0626442
ENSG00000228063.2	LYPLAL1-DT	-0.893625	4.14268	351.99	0.0038114	0.0627858
ENSG00000185432.12	METTL7A	-1.39453	5.51145	902.067	0.00382638	0.062952
ENSG00000129003.19	VPS13C	-0.398993	6.12168	1374.7	0.00385303	0.0633096
ENSG00000167645.17	YIF1B	0.566754	6.52178	1827.84	0.0038788	0.0636518
ENSG00000169045.17	HNRNPH1	0.382776	7.41208	3376.51	0.00388532	0.0636778
ENSG00000162433.15	AK4	0.700126	6.32546	1592.2	0.0038919	0.0636878
ENSG00000136938.9	ANP32B	-0.39537	6.20281	1453.27	0.00389583	0.0636878
ENSG00000153976.3	HS3ST3A1	1.50554	3.36117	207.463	0.00394931	0.0643729
ENSG00000030110.13	BAK1	0.574145	4.75364	534.133	0.00394289	0.0643729
ENSG00000172296.13	SPTLC3	-0.841936	3.23322	185.678	0.00395772	0.0643729
ENSG00000129757.14	CDKN1C	-1.92505	1.49798	55.2523	0.00395429	0.0643729
ENSG00000198380.13	GFPT1	0.477616	7.36828	3276.96	0.00396742	0.0644493
ENSG00000166963.13	MAP1A	-0.352229	9.5748	15109.1	0.00397777	0.0645361
ENSG00000138738.10	PRDM5	-0.624785	2.93943	151.044	0.00400781	0.0649417
ENSG00000169031.20	COL4A3	1.25977	3.10532	168.978	0.00402337	0.0650302
ENSG00000206560.11	ANKRD28	-0.592407	5.3203	786.526	0.0040218	0.0650302
ENSG00000111144.10	LTA4H	-0.36516	6.34992	1608.58	0.00405846	0.0654331
ENSG00000102763.18	VWA8	-0.492162	4.21082	365.573	0.00405461	0.0654331
ENSG00000206538.9	VGLL3	-0.66532	6.319	1565.47	0.00406662	0.0654828
ENSG00000162772.17	ATF3	-1.37203	3.27428	187.354	0.00410492	0.066017
ENSG00000256940.2	PPP1R14B-AS1	1.14772	1.45448	54.4716	0.00415989	0.0665685
ENSG00000164889.14	SLC4A2	0.380787	8.00691	5086.81	0.00414816	0.0665685
ENSG00000144824.21	PHLDB2	-0.590703	6.2918	1549.71	0.00415908	0.0665685
ENSG00000152583.12	SPARCL1	-1.14315	2.57031	116.33	0.00415613	0.0665685
ENSG00000107249.23	GLIS3	-0.725313	5.40461	832.435	0.0042026	0.0671686
ENSG00000139329.5	LUM	0.58522	6.06626	1325.6	0.00420992	0.0672022
ENSG00000068615.19	REEP1	1.18746	1.41779	52.6976	0.00422191	0.0672681
ENSG00000010292.13	NCAPD2	-0.3873	5.22332	736.835	0.00422449	0.0672681
ENSG00000136689.18	IL1RN	1.30938	1.682	63.5116	0.00424628	0.0674483
ENSG00000182179.13	UBA7	-0.792733	5.04699	652.738	0.00424128	0.0674483
ENSG00000114270.17	COL7A1	2.30239	6.53544	1848.21	0.00426399	0.0676463
ENSG00000154153.13	RETREG1	0.627932	4.04578	324.745	0.00428573	0.0677744
ENSG00000125844.16	RRBP1	0.427475	9.19562	11644.6	0.00428268	0.0677744
ENSG00000130956.14	HABP4	-0.418701	6.05694	1308.35	0.00428785	0.0677744
ENSG00000130202.10	NECTIN2	0.54802	7.50377	3603.59	0.00430324	0.0679343
ENSG00000257221.4	AC007569.1	1.5269	1.06372	41.6976	0.00433503	0.0681112
ENSG00000240024.5	LINC00888	0.80251	3.11506	171.724	0.00432333	0.0681112
ENSG00000152049.6	KCNE4	0.533374	7.91698	4783.18	0.0043323	0.0681112
ENSG00000183036.11	PCP4	-2.14584	6.97997	2492.22	0.0043356	0.0681112
ENSG00000141556.21	TBCD	-0.393993	6.91021	2375.58	0.00436034	0.0684164
ENSG00000248092.8	NNT-AS1	-0.594695	3.50528	223.515	0.00437073	0.068496
ENSG00000198959.12	TGM2	1.05512	7.63936	3939.54	0.00439383	0.0686076
ENSG00000138386.17	NAB1	-0.517652	4.10183	338.586	0.00439099	0.0686076
ENSG00000171388.12	APLN	-1.32594	0.877588	36.0242	0.00438336	0.0686076
ENSG00000245275.8	SAP30L-AS1	1.24131	2.44233	108.489	0.0044153	0.0688595
ENSG00000166224.17	SGPL1	0.568072	5.5844	950.054	0.00443667	0.0688952
ENSG00000162604.12	TM2D1	0.403705	5.1714	714.197	0.00442372	0.0688952
ENSG00000115159.16	GPD2	-0.528125	4.74614	530.47	0.00443043	0.0688952
ENSG00000067177.15	PHKA1	-0.585764	5.29172	772.374	0.00443898	0.0688952
ENSG00000154229.12	PRKCA	-0.531512	6.43921	1707.67	0.00444501	0.0689057
ENSG00000170275.15	CRTAP	-0.46346	8.76989	8614.6	0.00446263	0.06893
ENSG00000168490.14	PHYHIP	-1.23635	2.39168	102.533	0.00445958	0.06893
ENSG00000166278.15	C2	-1.78371	2.48326	108.656	0.00445719	0.06893
ENSG00000117859.19	OSBPL9	0.327634	6.61299	1931.87	0.00447509	0.0690001
ENSG00000114166.8	KAT2B	-0.403768	4.82365	559.565	0.00448324	0.0690001
ENSG00000134533.6	RERG	-2.83075	3.68902	253.978	0.00448134	0.0690001
ENSG00000168374.11	ARF4	0.541681	8.7791	8725.62	0.00451915	0.0694698
ENSG00000166794.5	PPIB	0.444087	7.90244	4759.14	0.00453198	0.0695839
ENSG00000152684.11	PELO	0.391513	5.78891	1094.27	0.00453994	0.0696233
ENSG00000079102.16	RUNX1T1	-1.26555	1.83019	69.5208	0.00456927	0.0699897
ENSG00000147883.12	CDKN2B	1.13524	7.16553	2840.36	0.00462257	0.0704715
ENSG00000106803.10	SEC61B	0.461463	6.47657	1768.81	0.00461903	0.0704715
ENSG00000006451.8	RALA	0.392654	7.59491	3847.25	0.00461282	0.0704715
ENSG00000172661.19	WASHC2C	-0.348695	6.47231	1746.3	0.00462261	0.0704715
ENSG00000287287.1	AL133476.1	1.54424	1.6388	61.2086	0.00463878	0.0706345
ENSG00000111799.21	COL12A1	-0.699103	7.2731	3089.65	0.00464599	0.0706607
ENSG00000117479.15	SLC19A2	0.894418	4.50069	446.855	0.004672	0.0709725
ENSG00000090447.12	TFAP4	-0.754222	2.39125	103.306	0.00470597	0.0714043
ENSG00000120658.13	ENOX1	-0.807368	4.49057	442.428	0.00471635	0.0714777
ENSG00000205765.9	C5orf51	-0.461679	5.43524	852.018	0.00475039	0.071909
ENSG00000155363.18	MOV10	-0.555882	5.7246	1047.58	0.00475717	0.071927
ENSG00000072778.20	ACADVL	0.526829	8.80664	8872.93	0.00477652	0.0719873
ENSG00000197930.13	ERO1A	0.359253	6.5366	1842.37	0.00477792	0.0719873
ENSG00000104774.13	MAN2B1	-0.344999	6.73612	2108.48	0.00477014	0.0719873
ENSG00000001561.7	ENPP4	0.699984	5.17695	717.115	0.00480361	0.0722204
ENSG00000106804.8	C5	-0.970007	1.89527	73.3738	0.00481021	0.0722204
ENSG00000088756.13	ARHGAP28	-2.01523	1.68437	63.0131	0.00480482	0.0722204
ENSG00000084234.17	APLP2	-0.30032	9.63388	15703.9	0.00484343	0.0726345
ENSG00000058056.9	USP13	-0.457982	4.08428	334.398	0.00485644	0.072745
ENSG00000076258.10	FMO4	-1.04487	2.57208	116.842	0.00487662	0.0729624
ENSG00000109072.14	VTN	-1.44278	3.71416	252.376	0.00489595	0.0731667
ENSG00000186088.16	GSAP	-0.741469	2.59694	119.056	0.00491521	0.0733693
ENSG00000204568.12	MRPS18B	-0.399967	5.49706	889.514	0.00492749	0.0734674
ENSG00000221866.9	PLXNA4	0.952501	1.70221	64.7546	0.00495632	0.0736416
ENSG00000154978.13	VOPP1	0.443267	7.42833	3415.43	0.00495487	0.0736416
ENSG00000204138.13	PHACTR4	0.405382	5.11561	686.218	0.00494856	0.0736416
ENSG00000099910.17	KLHL22	-0.410194	4.82663	559.608	0.00498269	0.0738631
ENSG00000143382.15	ADAMTSL4	-0.790277	3.40031	208.345	0.00498082	0.0738631
ENSG00000096060.15	FKBP5	-0.803754	5.33328	791.839	0.00499369	0.073941
ENSG00000178882.15	RFLNA	1.78513	1.42733	52.9067	0.00501334	0.0739769
ENSG00000110031.13	LPXN	1.32814	5.72314	1058.09	0.0050029	0.0739769
ENSG00000151276.23	MAGI1	0.452861	5.36294	815.455	0.00500952	0.0739769
ENSG00000123643.13	SLC36A1	0.494243	5.03898	653.929	0.00502636	0.074038
ENSG00000148248.14	SURF4	0.445167	8.68806	8196.1	0.00502897	0.074038
ENSG00000140450.9	ARRDC4	0.687513	4.28371	384.904	0.00504965	0.0742575
ENSG00000147099.21	HDAC8	0.675709	2.60411	121.023	0.00505905	0.0743109
ENSG00000006468.14	ETV1	-0.739767	4.07781	335.227	0.00510741	0.0749359
ENSG00000124155.18	PIGT	-0.356011	7.63188	3913.98	0.00514845	0.075452
ENSG00000134575.13	ACP2	0.467886	6.17892	1437.65	0.00518861	0.0758679
ENSG00000198743.7	SLC5A3	-0.677825	5.79146	1090.72	0.00518366	0.0758679
ENSG00000197892.13	KIF13B	-0.476099	5.00876	636.297	0.0052066	0.0760446
ENSG00000165617.15	DACT1	1.45199	3.71466	260.77	0.00524073	0.0764565
ENSG00000270504.1	AL391422.4	0.613457	4.3889	413.819	0.00525053	0.0765128
ENSG00000164010.15	ERMAP	-0.482433	4.13167	346.169	0.0052723	0.0765711
ENSG00000005249.13	PRKAR2B	-0.535651	5.05151	655.18	0.00527236	0.0765711
ENSG00000114480.13	GBE1	-0.648361	7.23781	2968.22	0.0052658	0.0765711
ENSG00000021776.11	AQR	-0.385182	5.01068	636.425	0.00528492	0.0765809
ENSG00000113048.17	MRPS27	-0.387931	5.62454	971.745	0.00528254	0.0765809
ENSG00000198121.13	LPAR1	-0.694429	5.42665	861.768	0.00531521	0.0769333
ENSG00000054356.14	PTPRN	1.33279	2.15729	87.8617	0.00533966	0.0770128
ENSG00000157020.18	SEC13	0.477723	7.30605	3144.59	0.00533128	0.0770128
ENSG00000147065.17	MSN	0.470515	9.78796	17598.5	0.00533309	0.0770128
ENSG00000152402.11	GUCY1A2	-1.20435	3.24998	187.649	0.00534463	0.0770128
ENSG00000186792.17	HYAL3	0.6243	3.58463	236.733	0.00536675	0.0772452
ENSG00000183963.18	SMTN	0.664718	7.84882	4578.16	0.0054036	0.0773435
ENSG00000102007.11	PLP2	0.566556	6.46742	1755.95	0.00540316	0.0773435
ENSG00000183684.8	ALYREF	0.38975	5.20275	730.809	0.00538452	0.0773435
ENSG00000125746.17	EML2	-0.395209	6.00795	1270.34	0.00538691	0.0773435
ENSG00000104518.11	GSDMD	-0.852902	4.57718	470.178	0.00540312	0.0773435
ENSG00000176182.6	MYPOP	0.520957	4.25856	378.531	0.00542671	0.0774163
ENSG00000117543.21	DPH5	-0.507028	4.19824	361.768	0.00541937	0.0774163
ENSG00000164327.13	RICTOR	-0.522042	4.30667	390.236	0.00542133	0.0774163
ENSG00000076716.9	GPC4	0.62918	7.56908	3755.28	0.00545028	0.0775676
ENSG00000124067.17	SLC12A4	0.3508	7.51401	3611.01	0.00544432	0.0775676
ENSG00000154027.19	AK5	-0.838264	5.54846	924.692	0.00545538	0.0775676
ENSG00000168477.19	TNXB	-1.28004	3.50657	222.513	0.00546549	0.0776256
ENSG00000150636.17	CCDC102B	-1.50503	1.64053	61.2961	0.00548582	0.0778285
ENSG00000161267.12	BDH1	-0.643413	4.49923	443.594	0.00552273	0.0782661
ENSG00000110315.7	RNF141	-0.471073	5.53609	914.01	0.00554692	0.0785225
ENSG00000134318.14	ROCK2	-0.537582	6.2606	1514.51	0.00555553	0.078558
ENSG00000108852.15	MPP2	0.60376	3.74415	265.508	0.00559417	0.0786725
ENSG00000198700.10	IPO9	-0.341006	6.43046	1699.65	0.00557441	0.0786725
ENSG00000155463.14	OXA1L	-0.407834	6.2721	1524.86	0.00559103	0.0786725
ENSG00000135929.9	CYP27A1	-0.858155	5.35255	807.669	0.00558535	0.0786725
ENSG00000139835.14	GRTP1	-1.20715	1.08385	41.7739	0.00559091	0.0786725
ENSG00000186470.14	BTN3A2	-0.765969	4.70845	517.327	0.00561008	0.0788103
ENSG00000165171.11	METTL27	-0.898822	2.31394	97.0806	0.0056509	0.0792973
ENSG00000171310.11	CHST11	0.681193	3.91577	299.401	0.00568459	0.0796689
ENSG00000224389.9	C4B	-1.60213	2.99444	157.096	0.00568975	0.0796689
ENSG00000064042.18	LIMCH1	0.658533	6.15531	1417.38	0.00572063	0.0798791
ENSG00000213949.10	ITGA1	0.624161	4.10438	340.272	0.0057149	0.0798791
ENSG00000103005.12	USB1	0.477989	5.5697	941.652	0.00572957	0.0798791
ENSG00000109472.14	CPE	-0.34098	7.49945	3563.51	0.00572725	0.0798791
ENSG00000163191.6	S100A11	0.496625	8.62783	7862.17	0.00574659	0.0799434
ENSG00000153253.19	SCN3A	-1.25212	0.902922	37.1468	0.00574362	0.0799434
ENSG00000139926.16	FRMD6	0.969366	6.81203	2228.44	0.00577377	0.0802349
ENSG00000255874.2	PRECSIT	-1.82813	0.442106	26.2852	0.00580591	0.0805946
ENSG00000029534.21	ANK1	-0.787509	4.6127	480.395	0.00588154	0.0815565
ENSG00000180596.7	H2BC4	1.11312	3.43217	214.249	0.00589461	0.0816499
ENSG00000125912.11	NCLN	0.578633	7.61459	3891.85	0.00592631	0.0817438
ENSG00000104408.10	EIF3E	-0.417713	7.13986	2779.47	0.00592678	0.0817438
ENSG00000118482.12	PHF3	-0.498211	5.40827	837.202	0.00591351	0.0817438
ENSG00000278771.1	RN7SL3	-1.37153	0.800384	34.8322	0.0059172	0.0817438
ENSG00000115361.8	ACADL	1.54165	1.17071	44.2829	0.00596663	0.08203
ENSG00000149218.5	ENDOD1	-0.365009	7.25951	3043.51	0.00595457	0.08203
ENSG00000173757.10	STAT5B	-0.393448	5.87873	1155.98	0.00596382	0.08203
ENSG00000137575.12	SDCBP	-0.48764	7.75653	4264.2	0.00600233	0.0823923
ENSG00000167693.17	NXN	-0.495497	6.30811	1550.45	0.00600577	0.0823923
ENSG00000203727.4	SAMD5	-0.879635	4.82814	564.401	0.0060341	0.0826929
ENSG00000145934.16	TENM2	1.17314	3.75671	265.636	0.00605373	0.0827858
ENSG00000092148.13	HECTD1	-0.359246	6.59386	1904.64	0.00605028	0.0827858
ENSG00000132274.16	TRIM22	-0.73436	6.13232	1390.33	0.00613902	0.083863
ENSG00000112769.20	LAMA4	-0.814699	7.55808	3739.51	0.00615886	0.084045
ENSG00000116815.16	CD58	0.655068	2.73255	131.164	0.00618163	0.08423
ENSG00000177556.12	ATOX1	0.445401	6.02534	1287.55	0.0061855	0.08423
ENSG00000115307.17	AUP1	0.318721	6.67523	2024.48	0.00619827	0.0843149
ENSG00000135821.19	GLUL	-0.4335	7.39343	3323.19	0.00620919	0.0843742
ENSG00000104324.16	CPQ	-0.489016	6.22598	1475.29	0.00621712	0.0843929
ENSG00000137198.10	GMPR	-0.732149	3.98339	310.644	0.00624537	0.0846872
ENSG00000167202.11	TBC1D2B	-0.453626	6.76031	2132.36	0.00632401	0.0856634
ENSG00000167632.17	TRAPPC9	-0.472003	5.09732	676.53	0.00634131	0.0858075
ENSG00000171791.13	BCL2	-1.02719	2.90564	145.985	0.00634937	0.0858264
ENSG00000184985.16	SORCS2	1.61243	3.63038	246.626	0.00638522	0.0860611
ENSG00000259863.1	SH3RF3-AS1	1.2085	1.67755	63.5731	0.00639345	0.0860611
ENSG00000100379.17	KCTD17	0.383268	5.2676	763.37	0.00638241	0.0860611
ENSG00000132688.11	NES	-1.05846	5.78447	1114.08	0.0063877	0.0860611
ENSG00000109220.11	CHIC2	0.624647	4.16407	355.161	0.00640927	0.086184
ENSG00000111452.13	ADGRD1	1.41395	2.50206	109.545	0.00642566	0.0863143
ENSG00000198753.12	PLXNB3	0.570154	5.95726	1225.51	0.00643353	0.0863299
ENSG00000167658.16	EEF2	-0.439454	11.5225	58089.5	0.00645007	0.0864618
ENSG00000269893.8	SNHG8	-0.526128	5.75715	1066.63	0.00646749	0.0866052
ENSG00000155099.8	PIP4P2	-0.632576	5.76569	1073.51	0.00648039	0.0866879
ENSG00000169375.16	SIN3A	-0.544533	5.19987	723.875	0.00652743	0.0872265
ENSG00000187957.8	DNER	0.883985	6.94389	2429.26	0.00658814	0.0879465
ENSG00000144218.19	AFF3	-0.590515	4.57563	469.144	0.00659951	0.0880072
ENSG00000110330.8	BIRC2	0.456069	5.36869	819.128	0.00666519	0.088791
ENSG00000140455.17	USP3	-0.556067	3.29777	194.063	0.00668685	0.0889876
ENSG00000133135.14	RNF128	-1.02311	3.59817	241.906	0.00670838	0.089182
ENSG00000102174.9	PHEX	-1.1066	1.45593	54.9759	0.00673464	0.0894388
ENSG00000231290.6	APCDD1L-DT	1.36875	2.18853	89.9351	0.0067551	0.0896181
ENSG00000170871.12	KIAA0232	-0.474348	5.67897	1009.77	0.00676802	0.0896972
ENSG00000058085.15	LAMC2	2.55804	5.97786	1265.03	0.00686052	0.0904578
ENSG00000057935.14	MTA3	-0.411798	5.09086	671.089	0.00685873	0.0904578
ENSG00000064763.11	FAR2	-0.673982	3.59257	238.285	0.00685448	0.0904578
ENSG00000166106.3	ADAMTS15	-1.69891	1.1808	44.5898	0.00686045	0.0904578
ENSG00000005379.17	TSPOAP1	-1.84588	2.46295	107.771	0.00684152	0.0904578
ENSG00000223764.2	LINC02593	1.33351	3.41933	211.237	0.00690108	0.0906216
ENSG00000146592.17	CREB5	-0.823184	2.44735	107.939	0.0068959	0.0906216
ENSG00000134802.18	SLC43A3	-1.38605	1.52595	56.2968	0.00688074	0.0906216
ENSG00000129682.16	FGF13	-1.52577	2.78392	134.955	0.00689234	0.0906216
ENSG00000153446.15	C16orf89	-1.64873	2.27491	93.7176	0.00690972	0.0906425
ENSG00000138604.10	GLCE	-0.517911	4.91188	594.249	0.00694851	0.0910586
ENSG00000182963.11	GJC1	-0.433116	4.81962	554.477	0.00696994	0.091227
ENSG00000166949.16	SMAD3	-0.734617	7.02758	2560.39	0.0069826	0.091227
ENSG00000145147.20	SLIT2	-0.856126	6.43925	1730.02	0.00697646	0.091227
ENSG00000233527.9	ZNF529-AS1	0.90576	1.4174	53.0364	0.00701306	0.0912547
ENSG00000122691.13	TWIST1	-0.531817	5.58822	953.054	0.00702014	0.0912547
ENSG00000152527.14	PLEKHH2	-0.716057	3.83553	281.175	0.00701773	0.0912547
ENSG00000173083.15	HPSE	-0.910405	3.06073	163.475	0.00701063	0.0912547
ENSG00000173208.4	ABCD2	-1.11588	1.57552	58.1985	0.00701609	0.0912547
ENSG00000107338.10	SHB	0.414658	4.76979	539.575	0.00703519	0.0913581
ENSG00000155330.10	C16orf87	0.682268	3.14933	176.053	0.00704479	0.0913907
ENSG00000198919.13	DZIP3	-0.567936	4.28533	384.031	0.00706076	0.0915057
ENSG00000128595.17	CALU	0.525149	10.0067	20436.5	0.0071288	0.092202
ENSG00000088832.17	FKBP1A	0.475633	8.28426	6187.76	0.0071237	0.092202
ENSG00000159753.14	CARMIL2	1.44091	0.832517	35.5738	0.00716394	0.0924708
ENSG00000145012.13	LPP	-0.402054	6.86013	2288.82	0.0071578	0.0924708
ENSG00000119812.19	FAM98A	0.538081	7.18789	2896.61	0.00720136	0.0928607
ENSG00000071553.17	ATP6AP1	0.298382	8.14663	5611.02	0.00721532	0.0929477
ENSG00000182158.15	CREB3L2	0.671648	7.13986	2804.58	0.00724479	0.0931411
ENSG00000224597.10	SVIL-AS1	0.543371	4.53037	458.255	0.00724165	0.0931411
ENSG00000113578.18	FGF1	1.26769	4.41748	423.51	0.0072923	0.0936585
ENSG00000168685.15	IL7R	1.93854	2.40651	104.53	0.00732263	0.0939399
ENSG00000169032.10	MAP2K1	0.512035	6.18792	1443.09	0.0073288	0.0939399
ENSG00000117868.17	ESYT2	-0.338976	7.27556	3059.3	0.0073393	0.093981
ENSG00000272398.6	CD24	1.18185	2.85308	141.937	0.00736124	0.0941683
ENSG00000165338.16	HECTD2	0.569506	3.24871	188.941	0.00740075	0.0944861
ENSG00000128928.10	IVD	-0.327789	6.64178	1969.11	0.00739549	0.0944861
ENSG00000150787.8	PTS	0.463835	4.73009	528.029	0.00741945	0.0946311
ENSG00000050130.18	JKAMP	0.361225	6.14334	1401.78	0.00744549	0.0947755
ENSG00000119929.13	CUTC	-0.594885	3.21154	182.155	0.00744234	0.0947755
ENSG00000101194.18	SLC17A9	1.01776	4.55212	468.11	0.00747187	0.0950174
ENSG00000019582.15	CD74	-0.835636	3.54114	229.121	0.00749427	0.0952082
ENSG00000159322.17	ADPGK	0.441951	5.48255	891.475	0.00750626	0.0952667
ENSG00000139364.10	TMEM132B	0.897395	2.9485	155.375	0.00754138	0.0956182
ENSG00000138095.19	LRPPRC	-0.438763	6.68201	2024.17	0.00755324	0.0956744
ENSG00000172725.14	CORO1B	-0.305704	7.74609	4245.18	0.00756505	0.0957299
ENSG00000172985.11	SH3RF3	0.656797	4.35501	404.974	0.00758169	0.0958463
ENSG00000169715.15	MT1E	1.05654	6.74679	2136.56	0.00760254	0.0960156
ENSG00000186352.9	ANKRD37	0.898566	1.8735	72.5733	0.00768137	0.0969162
ENSG00000268812.3	AC004264.1	0.910204	2.28249	96.1028	0.0076958	0.0970032
ENSG00000033800.14	PIAS1	-0.440835	4.83258	562.695	0.00772382	0.0971751
ENSG00000198963.11	RORB	-1.31847	3.65541	246.854	0.00772452	0.0971751
ENSG00000165804.16	ZNF219	-0.446837	6.61456	1934.33	0.00774186	0.0972363
ENSG00000005108.16	THSD7A	-0.931436	3.15247	174.899	0.00774448	0.0972363
ENSG00000123353.10	ORMDL2	0.529543	5.06876	667.273	0.00778188	0.0976107
ENSG00000130304.17	SLC27A1	-0.822035	5.40464	829.888	0.00779925	0.0977335
ENSG00000142920.17	AZIN2	0.852198	2.57619	118.403	0.0078106	0.0977805
ENSG00000173114.13	LRRN3	1.15085	3.65134	249.889	0.007831	0.0978541
ENSG00000111615.14	KRR1	-0.535851	4.36355	407.08	0.00783167	0.0978541
ENSG00000185339.9	TCN2	-0.819016	3.85006	283.673	0.00788058	0.0983697
ENSG00000171522.6	PTGER4	-1.08697	2.58268	118.944	0.00794437	0.0990701
ENSG00000087494.16	PTHLH	1.07813	2.28854	96.818	0.00796973	0.0992902
ENSG00000166979.13	EVA1C	-0.9243	1.79006	68.3445	0.00798706	0.09941
ENSG00000138685.16	FGF2	0.618652	7.58314	3780.08	0.00805198	0.100121
ENSG00000167601.12	AXL	0.566037	8.31329	6289.16	0.00807149	0.100253
ENSG00000157483.9	MYO1E	-0.609296	6.51774	1803.57	0.00807818	0.100253
ENSG00000182372.10	CLN8	0.452447	5.22777	741.255	0.00809344	0.100341
ENSG00000131558.15	EXOC4	-0.317435	6.14504	1395.87	0.00810728	0.100341
ENSG00000109339.24	MAPK10	-0.889877	2.6242	121.464	0.00810863	0.100341
ENSG00000166402.9	TUB	-0.488219	5.15233	700.197	0.00813566	0.100579
ENSG00000197746.14	PSAP	-0.414329	11.7534	68082.4	0.00818545	0.101098
ENSG00000119048.8	UBE2B	0.341076	5.74316	1058.83	0.00821704	0.101282
ENSG00000077254.14	USP33	-0.411076	5.89412	1171.12	0.00822395	0.101282
ENSG00000035681.9	NSMAF	-0.443702	5.53421	912.726	0.00821504	0.101282
ENSG00000124786.11	SLC35B3	0.483271	4.64082	494.859	0.00827515	0.101815
ENSG00000116717.13	GADD45A	0.620739	8.90513	9424.99	0.00828426	0.10183
ENSG00000104331.9	BPNT2	0.362356	7.1585	2834.92	0.00829591	0.101876
ENSG00000279821.1	AC145098.2	1.21909	1.56511	59.0099	0.00836474	0.101953
ENSG00000203706.8	SERTAD4-AS1	1.07831	1.80666	69.5958	0.00836254	0.101953
ENSG00000179387.10	ELMOD2	0.432286	4.69165	512.054	0.00834465	0.101953
ENSG00000104133.15	SPG11	-0.391272	5.66493	1001.5	0.00834801	0.101953
ENSG00000083168.11	KAT6A	-0.415713	4.68308	506.829	0.00834964	0.101953
ENSG00000197442.10	MAP3K5	-0.474581	4.33052	396.555	0.00832631	0.101953
ENSG00000128512.23	DOCK4	-0.6011	3.24275	189.776	0.00836551	0.101953
ENSG00000184489.12	PTP4A3	-0.904101	3.37388	203.927	0.00834463	0.101953
ENSG00000075213.11	SEMA3A	-0.705453	4.03563	329.638	0.00847433	0.103084
ENSG00000266094.8	RASSF5	-0.978522	2.34746	99.5713	0.00847238	0.103084
ENSG00000134901.13	POGLUT2	0.755622	3.86177	290.254	0.00849056	0.103184
ENSG00000104341.17	LAPTM4B	-0.329424	6.46471	1744.41	0.00850028	0.103205
ENSG00000168701.19	TMEM208	0.436643	5.30743	785.213	0.0085319	0.103484
ENSG00000109458.8	GAB1	-0.74197	3.73912	263.033	0.00853933	0.103484
ENSG00000205220.12	PSMB10	-0.687668	2.59581	119.196	0.00855101	0.103528
ENSG00000214402.7	LCNL1	-1.75177	3.15793	176.907	0.00857242	0.10369
ENSG00000155660.11	PDIA4	0.665743	7.62329	3940.29	0.00858679	0.103766
ENSG00000112039.5	FANCE	-0.776177	3.18659	178.713	0.00861109	0.103963
ENSG00000255529.9	POLR2M	-0.510884	4.78295	542.957	0.00863008	0.104076
ENSG00000109511.12	ANXA10	-0.912455	4.81598	571.19	0.00863668	0.104076
ENSG00000119638.13	NEK9	-0.512331	6.70341	2054.04	0.00864794	0.104115
ENSG00000143443.10	C1orf56	-0.701749	2.98814	156.735	0.00866076	0.104172
ENSG00000149289.11	ZC3H12C	-0.643853	3.71651	259.982	0.00869934	0.104538
ENSG00000163399.16	ATP1A1	-0.300862	7.58199	3795.35	0.00874765	0.105021
ENSG00000186395.8	KRT10	0.3981	5.98237	1254.33	0.0087815	0.105329
ENSG00000091592.16	NLRP1	0.515119	4.30965	396.054	0.00881828	0.105672
ENSG00000060982.15	BCAT1	0.447626	6.38878	1659.29	0.00885587	0.105801
ENSG00000186866.16	POFUT2	0.408848	6.87695	2333.65	0.00885094	0.105801
ENSG00000176720.6	BOK	0.384804	5.70023	1031.01	0.00886194	0.105801
ENSG00000131724.11	IL13RA1	0.341247	6.18025	1434.46	0.00885232	0.105801
ENSG00000102580.15	DNAJC3	0.470039	6.29322	1556.44	0.00887219	0.105826
ENSG00000215190.9	LINC00680	0.641535	3.03678	162.637	0.00898047	0.10682
ENSG00000141759.15	TXNL4A	0.353382	6.49529	1786.47	0.00896414	0.10682
ENSG00000157617.17	C2CD2	-0.670741	6.1542	1405.2	0.00897266	0.10682
ENSG00000125384.7	PTGER2	-1.51736	4.21004	364.934	0.0089919	0.106858
ENSG00000173540.13	GMPPB	0.514464	5.14437	702.907	0.00907304	0.107426
ENSG00000138686.10	BBS7	-0.436026	5.38462	825.728	0.00906402	0.107426
ENSG00000103222.19	ABCC1	-0.860298	7.48105	3528.59	0.0090652	0.107426
ENSG00000124496.12	TRERF1	-0.870994	3.63816	246.488	0.00906423	0.107426
ENSG00000198853.12	RUSC2	0.701886	7.93544	4839.33	0.00912345	0.107923
ENSG00000120256.11	LRP11	0.780278	2.6269	123.376	0.00919502	0.10857
ENSG00000111328.7	CDK2AP1	0.39374	7.51133	3631.13	0.00919474	0.10857
ENSG00000169926.11	KLF13	-0.432248	5.57219	939.048	0.00928032	0.109191
ENSG00000117984.14	CTSD	-0.492722	9.39086	13209.6	0.00926305	0.109191
ENSG00000158887.19	MPZ	-1.56252	0.605681	30.1131	0.00927006	0.109191
ENSG00000118898.16	PPL	-1.95014	2.9707	153.999	0.00928152	0.109191
ENSG00000171793.16	CTPS1	0.973368	6.77596	2168.29	0.00930932	0.10923
ENSG00000180573.9	H2AC6	0.482009	6.4159	1688.71	0.00931922	0.10923
ENSG00000089280.19	FUS	0.336087	7.79321	4390.91	0.00929787	0.10923
ENSG00000122406.14	RPL5	-0.339192	8.81585	8891.92	0.00931161	0.10923
ENSG00000144791.10	LIMD1	-0.588088	4.30612	389.463	0.00932723	0.10923
ENSG00000118855.21	MFSD1	0.544127	7.5518	3721.36	0.00934271	0.109312
ENSG00000020129.16	NCDN	-0.447102	7.14172	2787.16	0.00935182	0.10932
ENSG00000130758.8	MAP3K10	0.41461	5.17893	716.17	0.00936438	0.109367
ENSG00000156273.16	BACH1	-0.673325	4.68859	508.742	0.00938382	0.109495
ENSG00000147852.16	VLDLR	0.755365	4.16088	353.81	0.00939663	0.109545
ENSG00000138069.18	RAB1A	0.331347	7.9128	4771.08	0.00940568	0.109552
ENSG00000137996.13	RTCA	0.389067	6.04831	1313.87	0.00941615	0.109574
ENSG00000198833.7	UBE2J1	0.543816	6.17975	1434.91	0.00944116	0.109667
ENSG00000143761.16	ARF1	0.297443	8.79191	8790.01	0.00943811	0.109667
ENSG00000132356.11	PRKAA1	-0.321866	5.82538	1123.43	0.00947868	0.110004
ENSG00000101199.13	ARFGAP1	0.488559	7.16428	2852.93	0.00949599	0.110106
ENSG00000162817.7	C1orf115	-1.02654	1.45105	53.0888	0.00955079	0.110641
ENSG00000106367.15	AP1S1	0.418607	7.62743	3930.62	0.00959351	0.110837
ENSG00000184602.6	SNN	-0.550476	5.88579	1161.59	0.00959015	0.110837
ENSG00000115252.18	PDE1A	-1.32265	4.00546	315.077	0.0095821	0.110837
ENSG00000183578.8	TNFAIP8L3	1.07053	2.16394	89.3376	0.00960819	0.110907
ENSG00000122870.12	BICC1	-0.447333	5.00599	637.239	0.00964602	0.111244
ENSG00000140859.16	KIFC3	0.488132	6.47286	1756.57	0.0096626	0.111336
ENSG00000175115.13	PACS1	0.502634	7.58459	3795.17	0.0096718	0.111342
ENSG00000044574.8	HSPA5	0.82759	9.85997	18516.6	0.0096867	0.111414
ENSG00000163466.16	ARPC2	0.368138	8.72766	8404.03	0.00970277	0.1115
ENSG00000184898.7	RBM43	-0.658633	3.98211	310.85	0.00972661	0.111674
ENSG00000040608.14	RTN4R	1.27575	1.14731	43.5086	0.0097519	0.111827
ENSG00000160233.8	LRRC3	0.80054	2.8047	137.061	0.00975768	0.111827
ENSG00000121578.13	B4GALT4	0.514757	4.91425	598.358	0.00977463	0.111827
ENSG00000084731.15	KIF3C	0.367946	6.32383	1588.31	0.00977057	0.111827
ENSG00000197265.9	GTF2E2	0.390901	4.97042	621.66	0.00980866	0.111956
ENSG00000174775.17	HRAS	0.380655	5.64171	989.039	0.00979932	0.111956
ENSG00000130513.6	GDF15	-0.342787	6.97857	2452.97	0.00981198	0.111956
ENSG00000094916.16	CBX5	-0.370315	6.13714	1388.05	0.0098774	0.112602
ENSG00000130294.17	KIF1A	2.08757	1.74339	64.8886	0.00996727	0.113426
ENSG00000157873.17	TNFRSF14	-1.20391	4.21478	360.312	0.00996477	0.113426
ENSG00000174791.11	RIN1	-0.686814	4.95514	617.172	0.00999733	0.11358
ENSG00000132481.7	TRIM47	-1.09538	3.08044	166.314	0.00999843	0.11358
ENSG00000133424.21	LARGE1	0.91213	5.76964	1087	0.0100126	0.113587
ENSG00000011454.18	RABGAP1	-0.357554	6.27014	1521.41	0.0100167	0.113587
ENSG00000165092.13	ALDH1A1	-0.574082	5.84166	1111.75	0.0101621	0.115135
ENSG00000158195.11	WASF2	-0.401409	6.77738	2162.78	0.0101716	0.115141
ENSG00000134202.11	GSTM3	-0.375204	6.06565	1316.53	0.0101969	0.115326
ENSG00000204397.8	CARD16	-2.75723	0.425853	26.9124	0.0102137	0.115415
ENSG00000162981.14	LRATD1	-0.953389	3.79319	273.749	0.0102268	0.115462
ENSG00000049656.14	CLPTM1L	0.432611	7.65577	3996.35	0.0102567	0.115697
ENSG00000172071.14	EIF2AK3	0.497054	3.97984	313.357	0.010287	0.115938
ENSG00000135390.21	ATP5MC2	-0.342423	6.58681	1896.75	0.0103098	0.116094
ENSG00000107669.17	ATE1	-0.564529	4.71616	516.808	0.0103227	0.116137
ENSG00000107295.10	SH3GL2	-0.856388	2.17207	88.4397	0.0103465	0.116303
ENSG00000117411.16	B4GALT2	0.314184	7.24962	3015.76	0.0103793	0.116518
ENSG00000213639.10	PPP1CB	-0.341227	7.07963	2668.41	0.0103837	0.116518
ENSG00000184083.12	FAM120C	-0.692966	3.0349	161.507	0.0103958	0.116552
ENSG00000081307.13	UBA5	0.394087	4.87795	583.029	0.0104102	0.116613
ENSG00000106772.18	PRUNE2	-0.285444	9.1861	11410.6	0.0104324	0.116759
ENSG00000163655.16	GMPS	-0.494208	5.69482	1020.12	0.0105635	0.118124
ENSG00000170145.5	SIK2	-0.43748	5.36106	810.759	0.0105846	0.118257
ENSG00000113552.16	GNPDA1	-0.362942	7.00666	2534.89	0.0106797	0.119197
ENSG00000110492.15	MDK	-0.811244	6.07702	1346.61	0.0106872	0.119197
ENSG00000158966.16	CACHD1	0.862955	4.05392	330.311	0.0107189	0.119344
ENSG00000072954.7	TMEM38A	-0.475952	4.1754	355.275	0.0107183	0.119344
ENSG00000180398.13	MCFD2	0.568657	8.87859	9368.01	0.0108128	0.120078
ENSG00000072840.13	EVC	-0.533509	5.96417	1224.62	0.0108054	0.120078
ENSG00000176490.5	DIRAS1	-1.18716	2.00111	79.2151	0.0107968	0.120078
ENSG00000186918.14	ZNF395	-0.700072	3.98361	311.286	0.0108523	0.120412
ENSG00000107175.12	CREB3	0.503715	7.14785	2814	0.0109137	0.120989
ENSG00000184497.13	TMEM255B	0.510181	4.09733	338.278	0.0109245	0.121006
ENSG00000287649.1	AC093418.1	-1.69383	1.05648	40.9136	0.0109709	0.121415
ENSG00000140511.12	HAPLN3	0.871853	3.18136	181.601	0.0110029	0.121664
ENSG00000139438.6	FAM222A	0.863748	1.58109	59.0123	0.0110812	0.122133
ENSG00000165029.16	ABCA1	-0.544854	5.62036	971.169	0.011068	0.122133
ENSG00000173376.14	NDNF	-0.574589	4.95084	605.823	0.0110637	0.122133
ENSG00000066468.23	FGFR2	-0.621745	5.38594	822.31	0.0110878	0.122133
ENSG00000103490.14	PYCARD	-1.62944	1.0489	40.9509	0.0110927	0.122133
ENSG00000163931.16	TKT	-0.732689	9.41771	13440.8	0.011111	0.12223
ENSG00000056998.20	GYG2	-0.724803	3.21084	183.65	0.011128	0.122313
ENSG00000074695.6	LMAN1	0.444176	7.38543	3330.6	0.0111466	0.122394
ENSG00000134970.14	TMED7	0.376438	6.65469	1999.56	0.0111544	0.122394
ENSG00000196850.6	PPTC7	-0.417368	4.2635	378.64	0.011213	0.122933
ENSG00000167004.13	PDIA3	0.410236	8.82655	9019.84	0.0112808	0.123571
ENSG00000188906.16	LRRK2	-0.691382	3.36837	203.141	0.0113392	0.124105
ENSG00000151366.13	NDUFC2	0.552896	4.587	475.945	0.0114015	0.124284
ENSG00000101310.17	SEC23B	0.410937	5.88324	1169.6	0.0113754	0.124284
ENSG00000148110.16	MFSD14B	0.35515	6.07884	1339.29	0.0114038	0.124284
ENSG00000108828.16	VAT1	-0.26365	10.1172	21992.3	0.0113882	0.124284
ENSG00000181804.15	SLC9A9	-0.865125	3.32792	198.806	0.0113826	0.124284
ENSG00000128487.16	SPECC1	0.528963	4.583	472.36	0.0114499	0.124608
ENSG00000072310.17	SREBF1	-0.927565	6.85154	2269.65	0.0114529	0.124608
ENSG00000232973.13	CYP1B1-AS1	1.12572	2.58302	118.705	0.0114723	0.124714
ENSG00000135480.16	KRT7	2.27099	8.42105	6668.29	0.0115042	0.124828
ENSG00000196072.12	BLOC1S2	0.478849	5.8735	1159.22	0.0115004	0.124828
ENSG00000177565.18	TBL1XR1	-0.37735	6.48271	1762.46	0.0115119	0.124828
ENSG00000125864.14	BFSP1	-0.693589	2.22531	91.6731	0.0115302	0.124922
ENSG00000099256.19	PRTFDC1	-0.723316	2.70281	128.428	0.0115437	0.124963
ENSG00000168427.9	KLHL30	-0.863356	2.994	155.665	0.0116156	0.125636
ENSG00000128567.17	PODXL	0.883314	3.52849	227.971	0.0116396	0.12579
ENSG00000137309.20	HMGA1	-0.647142	7.82505	4506	0.0116517	0.125815
ENSG00000218336.9	TENM3	0.429626	5.54518	922.325	0.0116871	0.125862
ENSG00000136933.17	RABEPK	0.413986	4.72344	522.941	0.0117167	0.125862
ENSG00000106397.12	PLOD3	0.308692	8.00095	5083.99	0.011727	0.125862
ENSG00000101596.16	SMCHD1	-0.355783	5.06452	660.144	0.0117342	0.125862
ENSG00000075426.12	FOSL2	-0.390299	7.08918	2691.55	0.0117312	0.125862
ENSG00000171298.13	GAA	-0.43821	7.92617	4803.61	0.0117302	0.125862
ENSG00000197582.5	GPX1P1	-0.526845	5.23965	749.043	0.0116874	0.125862
ENSG00000043143.20	JADE2	-0.565496	5.90175	1178.71	0.0117173	0.125862
ENSG00000089159.16	PXN	0.508628	6.69078	2050.33	0.0118317	0.126696
ENSG00000164985.15	PSIP1	-0.465705	5.45917	868.568	0.0118316	0.126696
ENSG00000175287.19	PHYHD1	-0.649544	3.60718	238.734	0.0118663	0.126962
ENSG00000163565.18	IFI16	-0.539157	6.21997	1476.24	0.0119222	0.127454
ENSG00000176018.13	LYSMD3	0.39948	4.6314	490.453	0.0119558	0.127671
ENSG00000123136.15	DDX39A	0.39458	5.73045	1048.48	0.0119624	0.127671
ENSG00000010278.14	CD9	-0.377475	9.18357	11512.5	0.0119806	0.12776
ENSG00000137727.12	ARHGAP20	-0.576783	4.74715	531.109	0.0120063	0.127928
ENSG00000162522.11	KIAA1522	-0.452787	6.63355	1958.01	0.012028	0.127972
ENSG00000140285.11	FGF7	-1.64579	1.40405	53.4565	0.0120303	0.127972
ENSG00000066933.16	MYO9A	-0.378987	4.57033	469.042	0.0120555	0.128135
ENSG00000172869.14	DMXL1	-0.412705	5.06373	659.346	0.0120668	0.128149
ENSG00000197565.16	COL4A6	-0.414964	4.76817	538.221	0.0120984	0.128378
ENSG00000009413.16	REV3L	-0.515675	4.69106	508.032	0.012117	0.128471
ENSG00000143797.12	MBOAT2	0.571671	6.45988	1742.39	0.0121654	0.128821
ENSG00000170502.13	NUDT9	0.421212	5.82485	1121.32	0.0121701	0.128821
ENSG00000135596.18	MICAL1	0.365037	6.68183	2038.09	0.0123722	0.13082
ENSG00000250722.6	SELENOP	-1.18524	2.40787	103.659	0.0123792	0.13082
ENSG00000108518.8	PFN1	0.559828	9.949	19613.7	0.0124278	0.131036
ENSG00000135605.13	TEC	-0.67666	2.07797	83.5007	0.0124302	0.131036
ENSG00000133107.15	TRPC4	-1.54006	0.761419	33.5604	0.0124285	0.131036
ENSG00000116157.6	GPX7	0.622474	3.13128	172.668	0.0124666	0.131312
ENSG00000117069.15	ST6GALNAC5	0.956708	6.1508	1401.66	0.0125571	0.132157
ENSG00000189184.11	PCDH18	-0.995578	6.14901	1407.39	0.0126176	0.132686
ENSG00000185567.7	AHNAK2	-0.717984	8.36114	6565.27	0.0126578	0.133
ENSG00000162928.9	PEX13	0.354949	5.10589	681.425	0.0126756	0.133002
ENSG00000145730.20	PAM	-0.298576	8.72414	8343.5	0.0126786	0.133002
ENSG00000134153.10	EMC7	0.477512	7.09075	2706.37	0.0127465	0.133536
ENSG00000124191.18	TOX2	-0.711836	4.16132	352.203	0.0127503	0.133536
ENSG00000138119.17	MYOF	-0.483075	9.48821	14160.6	0.0127661	0.133593
ENSG00000152601.17	MBNL1	-0.327587	7.37486	3283.31	0.0127955	0.133792
ENSG00000029153.14	ARNTL2	-0.360766	5.07626	665.629	0.0128237	0.133978
ENSG00000013583.10	HEBP1	-0.595634	6.72845	2101.19	0.0129361	0.135043
ENSG00000072110.14	ACTN1	0.500084	10.5643	29954.1	0.0129751	0.135101
ENSG00000176148.16	TCP11L1	0.442683	4.35485	405.145	0.0129981	0.135101
ENSG00000109586.12	GALNT7	0.431297	5.22051	742.392	0.0129606	0.135101
ENSG00000071859.15	FAM50A	0.290401	7.22758	2965.61	0.0129843	0.135101
ENSG00000155324.10	GRAMD2B	-0.442973	5.2791	760.576	0.0130256	0.135101
ENSG00000143815.15	LBR	-0.444896	3.76074	267.503	0.0130154	0.135101
ENSG00000233276.6	GPX1	-0.497499	7.77651	4321.18	0.013015	0.135101
ENSG00000165898.14	ISCA2	-0.579977	3.21664	183.202	0.0130162	0.135101
ENSG00000178307.10	TMEM11	0.413471	4.66665	502.903	0.0130597	0.135242
ENSG00000110321.18	EIF4G2	0.389834	9.64526	15886	0.0130602	0.135242
ENSG00000170370.12	EMX2	-0.339364	5.30686	783.7	0.0130914	0.135353
ENSG00000106546.14	AHR	-0.495254	6.97488	2486.45	0.0131124	0.135353
ENSG00000130340.16	SNX9	-0.515017	6.43443	1705.65	0.0131129	0.135353
ENSG00000156011.17	PSD3	-0.782016	6.29569	1545.52	0.0130974	0.135353
ENSG00000087842.11	PIR	-0.78679	4.56184	464.265	0.0131564	0.135693
ENSG00000256537.5	SMIM10L1	0.350999	5.00156	633.309	0.0132776	0.136752
ENSG00000111642.16	CHD4	-0.482291	4.49334	444.689	0.0132838	0.136752
ENSG00000124212.6	PTGIS	-1.22257	2.46497	108.787	0.0132909	0.136752
ENSG00000256235.2	SMIM3	0.558517	5.7693	1087.78	0.0133236	0.13687
ENSG00000099204.20	ABLIM1	-0.486417	7.626	3877.3	0.013321	0.13687
ENSG00000143469.20	SYT14	0.484414	4.42117	422.501	0.0133413	0.136942
ENSG00000129038.16	LOXL1	0.518915	8.43965	6925.4	0.013372	0.137039
ENSG00000113916.18	BCL6	-0.388153	5.65333	992.945	0.013365	0.137039
ENSG00000115556.14	PLCD4	-0.593424	3.27863	191.48	0.0134449	0.137676
ENSG00000105819.14	PMPCB	-0.332247	5.73472	1051.62	0.0134652	0.137775
ENSG00000088543.15	C3orf18	-0.497853	4.65522	497.044	0.0134839	0.137857
ENSG00000102038.16	SMARCA1	-0.306054	6.89281	2356.47	0.0135021	0.137933
ENSG00000140521.16	POLG	0.341918	5.92273	1200.34	0.0135309	0.138118
ENSG00000057252.13	SOAT1	-0.399314	5.4952	894.104	0.0135678	0.138276
ENSG00000120262.10	CCDC170	-0.946088	1.41544	52.6062	0.0135583	0.138276
ENSG00000099999.15	RNF215	0.431398	5.31882	792.39	0.0136008	0.138503
ENSG00000135063.19	FAM189A2	1.0898	1.21808	45.9151	0.0136409	0.138582
ENSG00000058262.10	SEC61A1	0.342296	9.45868	13968.4	0.0136224	0.138582
ENSG00000123243.15	ITIH5	-0.988164	1.98218	76.2472	0.0136379	0.138582
ENSG00000152785.7	BMP3	1.20826	1.61351	61.0302	0.0136696	0.138651
ENSG00000166579.16	NDEL1	0.436117	5.8879	1174.8	0.0136746	0.138651
ENSG00000135253.14	KCP	-1.4105	2.9717	152.995	0.0136799	0.138651
ENSG00000221963.6	APOL6	-1.10601	2.84876	142.499	0.0137384	0.139134
ENSG00000225648.5	SBDSP1	0.553016	5.17119	713.348	0.0137905	0.139552
ENSG00000187123.15	LYPD6	1.10032	3.2772	189.777	0.0138108	0.139647
ENSG00000197646.8	PDCD1LG2	1.14646	5.33264	804.356	0.0138566	0.140001
ENSG00000172270.20	BSG	-0.262318	9.97258	19842.8	0.0138687	0.140013
ENSG00000116690.13	PRG4	2.58766	1.52472	57.6871	0.0139268	0.140317
ENSG00000110756.18	HPS5	0.429167	5.96903	1238.16	0.0139315	0.140317
ENSG00000113504.21	SLC12A7	-0.361341	6.10828	1358.5	0.0139219	0.140317
ENSG00000163479.14	SSR2	0.36254	6.51075	1812.65	0.0139563	0.140457
ENSG00000049239.13	H6PD	-0.480544	6.54436	1848.14	0.0139776	0.140561
ENSG00000198818.10	SFT2D1	0.432167	5.03589	649.8	0.0139955	0.140631
ENSG00000110628.16	SLC22A18	-0.475113	5.28394	769.511	0.0140151	0.140719
ENSG00000131236.17	CAP1	0.536492	9.21277	11781.4	0.0141006	0.141426
ENSG00000086598.11	TMED2	0.446525	7.7121	4164.75	0.0141075	0.141426
ENSG00000175198.17	PCCA	-0.461634	3.73102	261.194	0.0141227	0.141469
ENSG00000185722.18	ANKFY1	-0.421109	6.41246	1680.8	0.014137	0.141502
ENSG00000149823.9	VPS51	-0.471128	5.93376	1205.08	0.014159	0.141611
ENSG00000139354.11	GAS2L3	-0.80326	2.01406	79.7585	0.0141752	0.141664
ENSG00000176014.13	TUBB6	0.668223	8.58047	7598.65	0.0142828	0.142301
ENSG00000106351.13	AGFG2	-0.408019	4.95539	612.892	0.0142601	0.142301
ENSG00000103034.14	NDRG4	-0.976469	4.85547	568.293	0.0142638	0.142301
ENSG00000161835.11	TAMALIN	-1.23057	2.248	94.668	0.0142831	0.142301
ENSG00000132434.9	LANCL2	0.886746	5.10844	683.556	0.0143085	0.142444
ENSG00000067221.14	STOML1	0.413336	5.17683	717.244	0.0143268	0.142515
ENSG00000108854.16	SMURF2	0.895199	7.81067	4452.63	0.0143587	0.142723
ENSG00000130741.11	EIF2S3	-0.327318	7.34354	3209.35	0.0143822	0.142737
ENSG00000103264.18	FBXO31	-0.403556	5.67689	1007.98	0.0143804	0.142737
ENSG00000169213.7	RAB3B	0.58126	7.35452	3257.55	0.014502	0.143704
ENSG00000102804.15	TSC22D1	-0.340685	7.21952	2948.8	0.0144943	0.143704
ENSG00000188641.14	DPYD	-0.483999	4.91355	595.473	0.0145855	0.14442
ENSG00000102030.16	NAA10	0.370909	4.84826	571.644	0.0146489	0.144937
ENSG00000128283.7	CDC42EP1	0.384388	6.97046	2468.97	0.0146973	0.145304
ENSG00000213380.15	COG8	-0.547776	3.29534	194.018	0.0147595	0.145807
ENSG00000068878.15	PSME4	0.536019	6.49378	1786	0.0148077	0.145952
ENSG00000151929.10	BAG3	0.487039	6.79175	2196.13	0.0148275	0.145952
ENSG00000160326.14	SLC2A6	0.455754	5.92415	1199.6	0.014835	0.145952
ENSG00000114948.13	ADAM23	-0.399325	7.00825	2565.97	0.0148234	0.145952
ENSG00000092010.15	PSME1	-0.459278	6.47347	1755.62	0.0148158	0.145952
ENSG00000196535.16	MYO18A	-0.472249	6.34656	1610.59	0.0148421	0.145952
ENSG00000074842.8	MYDGF	0.450993	8.36026	6542.03	0.0149581	0.14623
ENSG00000205423.11	CNEP1R1	0.445446	4.08764	337.069	0.0148934	0.14623
ENSG00000168268.11	NT5DC2	0.33751	6.26678	1536.28	0.0149456	0.14623
ENSG00000135932.11	CAB39	-0.329291	6.32762	1583.55	0.0149397	0.14623
ENSG00000164070.12	HSPA4L	-0.440044	4.98918	623.628	0.0149409	0.14623
ENSG00000006756.16	ARSD	-0.457865	4.70223	513.423	0.0149197	0.14623
ENSG00000133315.12	MACROD1	-0.712686	3.98615	312.627	0.0149612	0.14623
ENSG00000197872.11	CYRIA	-0.981513	3.14213	176.298	0.0149453	0.14623
ENSG00000189221.10	MAOA	-0.946213	3.50214	222.272	0.0150794	0.147273
ENSG00000123562.18	MORF4L2	0.304809	7.64302	3957.05	0.0151105	0.147353
ENSG00000188921.14	HACD4	-0.746383	2.58728	119.082	0.0151055	0.147353
ENSG00000168310.11	IRF2	-0.541119	3.62522	243.774	0.0151457	0.147585
ENSG00000068724.17	TTC7A	0.533452	4.2598	380.131	0.0153154	0.149091
ENSG00000168765.17	GSTM4	-0.66408	4.947	606.739	0.0153235	0.149091
ENSG00000138449.11	SLC40A1	-1.67333	5.94086	1197.59	0.0153353	0.149094
ENSG00000071537.14	SEL1L	0.358789	7.25685	3035.43	0.0154088	0.149695
ENSG00000115041.13	KCNIP3	-0.536065	2.93293	150.796	0.0154701	0.150178
ENSG00000176171.11	BNIP3	0.547644	6.14718	1405.77	0.0155664	0.150999
ENSG00000186854.11	TRABD2A	-1.08992	2.12058	87.0886	0.0155799	0.151016
ENSG00000008441.17	NFIX	-0.474882	8.38276	6582.87	0.0156018	0.151115
ENSG00000187323.12	DCC	-0.888985	1.72281	65.1358	0.0156499	0.151467
ENSG00000106400.12	ZNHIT1	0.342216	6.90399	2374.83	0.0157314	0.152141
ENSG00000137831.15	UACA	0.676098	6.92078	2408.86	0.0157566	0.15227
ENSG00000275993.3	SIK1B	1.65426	0.834746	35.2522	0.0158285	0.152289
ENSG00000131473.17	ACLY	0.437945	9.15603	11280	0.0157818	0.152289
ENSG00000197381.16	ADARB1	0.435763	5.72523	1044.32	0.0158102	0.152289
ENSG00000070018.9	LRP6	0.354658	5.43055	854.369	0.0158252	0.152289
ENSG00000126214.21	KLC1	0.307565	6.66952	2014.87	0.0158294	0.152289
ENSG00000135632.12	SMYD5	-0.437734	4.55462	464.39	0.0157915	0.152289
ENSG00000115758.13	ODC1	0.642772	7.57654	3805.55	0.0158986	0.152459
ENSG00000100731.16	PCNX1	0.408063	6.07304	1333.24	0.0158965	0.152459
ENSG00000175216.15	CKAP5	-0.29632	6.68857	2037.02	0.0158622	0.152459
ENSG00000108946.15	PRKAR1A	-0.307557	8.16061	5664.14	0.0159062	0.152459
ENSG00000186815.13	TPCN1	-0.591324	6.42348	1699.69	0.0158819	0.152459
ENSG00000065717.15	TLE2	-0.951223	2.96359	153.034	0.0160788	0.153947
ENSG00000136696.11	IL36B	-1.93979	1.73156	63.8253	0.0160855	0.153947
ENSG00000100380.14	ST13	-0.34929	8.25768	6039.2	0.0161104	0.154071
ENSG00000164694.17	FNDC1	1.45616	2.57701	118.383	0.016237	0.154342
ENSG00000189050.16	RNFT1	0.788882	2.61342	121.462	0.0162945	0.154342
ENSG00000145247.12	OCIAD2	0.627829	6.29947	1555.98	0.0162068	0.154342
ENSG00000159128.15	IFNGR2	0.409845	4.8073	556.584	0.0162022	0.154342
ENSG00000163453.11	IGFBP7	0.371952	11.2147	46837.1	0.0162453	0.154342
ENSG00000185043.12	CIB1	0.318684	6.60347	1928.05	0.0162617	0.154342
ENSG00000166025.18	AMOTL1	-0.358876	6.8966	2353.71	0.0162043	0.154342
ENSG00000100316.16	RPL3	-0.364233	10.335	25513.3	0.0161686	0.154342
ENSG00000085224.23	ATRX	-0.38464	5.97441	1243.04	0.016235	0.154342
ENSG00000160007.19	ARHGAP35	-0.405047	7.44469	3440.34	0.0161598	0.154342
ENSG00000161513.12	FDXR	-0.55601	5.50963	895.923	0.0162808	0.154342
ENSG00000179104.9	TMTC2	-0.585501	2.47179	109.377	0.0162588	0.154342
ENSG00000163322.14	ABRAXAS1	-0.617963	3.35857	202.345	0.0162895	0.154342
ENSG00000239713.9	APOBEC3G	-0.679071	2.82524	140.032	0.0163147	0.15442
ENSG00000164850.15	GPER1	-0.654796	4.2821	385.553	0.0163492	0.154633
ENSG00000153956.16	CACNA2D1	0.469509	5.96737	1248.2	0.0164103	0.155097
ENSG00000177425.11	PAWR	0.56366	6.91895	2383.68	0.0164298	0.155168
ENSG00000148572.16	NRBF2	0.393299	4.85652	572.995	0.016566	0.156111
ENSG00000167994.13	RAB3IL1	-0.614937	5.30054	777.395	0.0165566	0.156111
ENSG00000253958.2	CLDN23	-0.904229	2.18613	89.5463	0.0165422	0.156111
ENSG00000151348.15	EXT2	0.364931	7.44311	3454.91	0.0165901	0.156223
ENSG00000157833.13	GAREM2	0.453212	4.00306	316.674	0.0166151	0.156231
ENSG00000102699.6	PARP4	-0.344566	6.13096	1387.77	0.0166045	0.156231
ENSG00000144136.11	SLC20A1	0.468274	7.11566	2768.92	0.0166457	0.156381
ENSG00000189091.13	SF3B3	-0.293138	6.94796	2437.51	0.0166554	0.156381
ENSG00000143862.8	ARL8A	0.356215	6.39646	1665.68	0.0168187	0.157785
ENSG00000172428.11	COPS9	0.339009	5.64352	990.385	0.0168294	0.157785
ENSG00000123095.6	BHLHE41	-0.584367	6.10339	1356.01	0.0168524	0.157886
ENSG00000078401.7	EDN1	3.15696	2.20068	91.0177	0.0169468	0.158539
ENSG00000099822.3	HCN2	1.0115	1.85806	72.0563	0.0169836	0.158539
ENSG00000139160.13	ETFBKMT	-0.671908	1.92533	74.8308	0.0169769	0.158539
ENSG00000156298.13	TSPAN7	-1.07346	4.3016	388.434	0.016935	0.158539
ENSG00000147576.17	ADHFE1	-1.2326	0.764824	33.2529	0.0169825	0.158539
ENSG00000169919.17	GUSB	-0.430895	5.4857	883.534	0.0170086	0.158656
ENSG00000197622.13	CDC42SE1	0.351028	5.55711	932.752	0.0170238	0.158659
ENSG00000105373.19	NOP53	-0.70634	7.11072	2722.12	0.0170335	0.158659
ENSG00000169908.12	TM4SF1	-0.574233	8.41477	6808.48	0.0170672	0.158858
ENSG00000085449.15	WDFY1	-0.344753	5.42591	851.69	0.0170931	0.158984
ENSG00000159111.13	MRPL10	-0.389153	5.26046	755.956	0.0171356	0.159265
ENSG00000228486.10	C2orf92	1.00107	1.38826	51.6972	0.0172112	0.159517
ENSG00000188522.15	FAM83G	0.561347	5.78154	1086.66	0.0172371	0.159517
ENSG00000069869.16	NEDD4	0.54896	4.59154	478.986	0.0172315	0.159517
ENSG00000088986.11	DYNLL1	0.325843	7.97794	4997.04	0.0172263	0.159517
ENSG00000149311.19	ATM	-0.402882	6.00021	1265.79	0.017206	0.159517
ENSG00000092964.18	DPYSL2	-0.478988	6.46729	1754.65	0.0172078	0.159517
ENSG00000074855.11	ANO8	0.411222	4.03525	325.991	0.0172899	0.159891
ENSG00000164970.15	FAM219A	0.373272	6.03753	1301.7	0.0173756	0.160568
ENSG00000143753.13	DEGS1	0.376676	7.54563	3703.33	0.017394	0.160623
ENSG00000240342.3	RPS2P5	-0.412093	6.38836	1677.57	0.0174106	0.160662
ENSG00000166173.11	LARP6	0.362391	7.43906	3443.4	0.0174873	0.161254
ENSG00000163521.16	GLB1L	-0.421952	3.71913	259.386	0.0175394	0.161588
ENSG00000196154.12	S100A4	-0.860533	5.03023	651.072	0.0175486	0.161588
ENSG00000197457.10	STMN3	-0.827431	4.21968	371.044	0.0175888	0.161842
ENSG00000163879.11	DNALI1	-0.684193	2.92212	150.081	0.0176207	0.16202
ENSG00000188191.15	PRKAR1B	-0.463371	5.1468	703.495	0.0176936	0.162574
ENSG00000174231.17	PRPF8	-0.287296	7.81907	4464.44	0.0177617	0.163083
ENSG00000130725.8	UBE2M	0.317105	6.90479	2375.68	0.0178751	0.164008
ENSG00000146826.17	MAP11	0.40265	4.764	539.279	0.0179266	0.164247
ENSG00000152804.11	HHEX	-0.909661	1.99314	78.8132	0.0179265	0.164247
ENSG00000078070.13	MCCC1	-0.525174	5.40002	831.224	0.0180063	0.164859
ENSG00000173214.7	MFSD4B	0.483527	3.45048	217.448	0.0180847	0.16546
ENSG00000126522.17	ASL	0.498172	4.77681	545.585	0.0180978	0.165462
ENSG00000104213.13	PDGFRL	0.591503	3.79167	275.802	0.0181366	0.165581
ENSG00000136052.9	SLC41A2	0.483589	3.72455	261.206	0.0181241	0.165581
ENSG00000168575.10	SLC20A2	0.611639	7.25083	3020.96	0.0181802	0.165627
ENSG00000148120.16	AOPEP	0.398872	5.78505	1089.4	0.0181678	0.165627
ENSG00000117266.15	CDK18	-0.708554	4.63785	490.691	0.018171	0.165627
ENSG00000155974.12	GRIP1	0.671919	2.30118	97.4279	0.0182283	0.165831
ENSG00000099219.14	ERMP1	-0.363371	4.60633	479.895	0.0182216	0.165831
ENSG00000169490.17	TM2D2	0.409321	6.41776	1696.44	0.0182638	0.16592
ENSG00000169905.12	TOR1AIP2	0.321876	6.13349	1391.74	0.0182617	0.16592
ENSG00000109654.16	TRIM2	-0.59939	4.81799	557.658	0.0182917	0.166056
ENSG00000276550.4	HERC2P2	0.47579	5.94123	1214.26	0.0183372	0.166125
ENSG00000090020.11	SLC9A1	0.42517	6.30946	1569.68	0.0183509	0.166125
ENSG00000148175.13	STOM	-0.375249	7.38893	3305.45	0.0183471	0.166125
ENSG00000108179.14	PPIF	-0.458787	6.42326	1688.94	0.0183219	0.166125
ENSG00000060656.20	PTPRU	-0.657287	5.23713	736.982	0.0184069	0.166515
ENSG00000185340.15	GAS2L1	0.365921	6.29662	1557.6	0.018511	0.167339
ENSG00000114573.10	ATP6V1A	-0.401879	7.54704	3683.27	0.0186387	0.168258
ENSG00000126106.14	TMEM53	-0.528293	3.20831	182.056	0.0186293	0.168258
ENSG00000100129.18	EIF3L	-0.369258	6.52571	1818.16	0.0186823	0.168533
ENSG00000226287.8	TMEM191A	0.680147	2.00778	80.0087	0.0187064	0.168633
ENSG00000103196.12	CRISPLD2	1.14491	1.61374	60.211	0.0187207	0.168644
ENSG00000066322.15	ELOVL1	0.361443	7.14769	2812.54	0.0187965	0.16909
ENSG00000115295.20	CLIP4	-0.357651	6.26521	1511.78	0.0187852	0.16909
ENSG00000128891.15	CCDC32	0.601049	3.15969	176.902	0.018851	0.169271
ENSG00000113272.14	THG1L	-0.595555	3.12369	171.475	0.0188368	0.169271
ENSG00000154589.7	LY96	-0.613575	3.76023	267.406	0.018856	0.169271
ENSG00000067113.17	PLPP1	0.525358	5.8342	1130.11	0.0188867	0.16931
ENSG00000130311.11	DDA1	0.398854	6.76522	2156.64	0.0188764	0.16931
ENSG00000179218.14	CALR	0.660022	10.5242	29305	0.0189255	0.16954
ENSG00000112186.12	CAP2	0.48026	6.39179	1657.27	0.0190203	0.169894
ENSG00000170381.14	SEMA3E	0.42973	4.00594	316.431	0.0190016	0.169894
ENSG00000140474.14	ULK3	0.348543	5.22181	738.536	0.0190309	0.169894
ENSG00000010803.16	SCMH1	-0.464214	4.89699	587.384	0.0189883	0.169894
ENSG00000221869.5	CEBPD	-0.749795	4.49477	446.337	0.019027	0.169894
ENSG00000152137.8	HSPB8	0.583423	7.10655	2691.64	0.0190491	0.169938
ENSG00000158793.14	NIT1	-0.354615	4.48867	443.854	0.0190704	0.17001
ENSG00000172403.11	SYNPO2	-0.516512	8.61033	7661.18	0.0190872	0.170042
ENSG00000134107.5	BHLHE40	0.71976	6.0235	1283.54	0.0191118	0.170144
ENSG00000169760.17	NLGN1	1.01258	2.5021	113.314	0.0191648	0.170353
ENSG00000167703.15	SLC43A2	0.822362	3.81592	278.898	0.0192031	0.170353
ENSG00000137944.18	KYAT3	-0.38135	4.42094	426.021	0.0192147	0.170353
ENSG00000101290.14	CDS2	-0.384483	6.60874	1918.16	0.0191531	0.170353
ENSG00000083097.14	DOP1A	-0.44531	3.48464	220.726	0.0191979	0.170353
ENSG00000237807.4	AC022034.1	-1.03147	3.10505	170.459	0.0192117	0.170353
ENSG00000047346.12	FAM214A	-0.39386	4.89063	584.629	0.0192323	0.170392
ENSG00000123472.12	ATPAF1	-0.302251	5.97424	1240.46	0.0192672	0.170584
ENSG00000225697.13	SLC26A6	0.658626	4.08278	335.497	0.0193641	0.171286
ENSG00000134375.11	TIMM17A	0.432134	6.81725	2231.95	0.019373	0.171286
ENSG00000184371.14	CSF1	-0.815131	6.59104	1890.17	0.0193976	0.171385
ENSG00000133878.9	DUSP26	1.57139	1.49557	56.0903	0.0194553	0.171757
ENSG00000103042.9	SLC38A7	0.326652	5.85168	1143.77	0.0194663	0.171757
ENSG00000143341.12	HMCN1	0.826868	6.8589	2310.99	0.0194928	0.171839
ENSG00000112078.14	KCTD20	-0.721613	6.80461	2194.06	0.0195023	0.171839
ENSG00000103351.13	CLUAP1	-0.444728	3.94869	304.111	0.0195294	0.171961
ENSG00000158560.14	DYNC1I1	0.421604	5.28845	772.912	0.0195444	0.171975
ENSG00000166971.17	AKTIP	0.580074	4.74436	531.612	0.0195656	0.172043
ENSG00000160588.10	MPZL3	1.63948	0.622177	30.1052	0.0196877	0.172881
ENSG00000118363.12	SPCS2	0.304435	5.93717	1214.16	0.0196821	0.172881
ENSG00000227671.4	AL390728.4	0.560787	2.88604	147.075	0.0197474	0.173132
ENSG00000149923.14	PPP4C	0.293488	7.11611	2751.06	0.0197565	0.173132
ENSG00000085831.15	TTC39A	-0.680241	2.39173	103.234	0.0197344	0.173132
ENSG00000104472.10	CHRAC1	-0.477979	4.29534	385.682	0.0197799	0.173218
ENSG00000223804.5	AC244669.1	0.727526	2.05189	82.0938	0.0198018	0.173247
ENSG00000144642.22	RBMS3	0.450903	4.21504	367.848	0.0198234	0.173247
ENSG00000108370.17	RGS9	-1.01005	2.51534	112.158	0.019823	0.173247
ENSG00000109743.11	BST1	0.722651	3.61018	243.053	0.0199494	0.174151
ENSG00000185551.15	NR2F2	-0.357631	7.91154	4753.54	0.0199611	0.174151
ENSG00000101224.17	CDC25B	-0.610747	6.3761	1639.38	0.0199675	0.174151
ENSG00000104660.19	LEPROTL1	0.346185	5.36049	814.066	0.0199934	0.174259
ENSG00000187193.9	MT1X	1.29065	2.42208	106.586	0.0200431	0.174574
ENSG00000143870.13	PDIA6	0.36285	8.03231	5197.86	0.0201303	0.175215
ENSG00000026297.16	RNASET2	-0.405744	5.16187	707.954	0.0201816	0.175543
ENSG00000215788.11	TNFRSF25	0.616084	3.6402	248.653	0.0202328	0.175787
ENSG00000278540.5	ACACA	-0.471235	6.64347	1973.34	0.0202369	0.175787
ENSG00000187325.5	TAF9B	-0.56821	4.19242	360.738	0.0203005	0.17622
ENSG00000246451.2	AL049840.2	0.87779	1.99258	79.3154	0.0203143	0.176221
ENSG00000154330.13	PGM5	-1.00495	4.84048	559.422	0.0203444	0.176364
ENSG00000107789.16	MINPP1	0.349046	5.20952	734.701	0.0203758	0.176517
ENSG00000179630.11	LACC1	-0.4355	6.5788	1883.04	0.0204058	0.176658
ENSG00000079432.7	CIC	-0.568475	7.68684	4063.36	0.0204368	0.176808
ENSG00000131981.16	LGALS3	-0.605647	6.82653	2242.24	0.0205498	0.177666
ENSG00000131669.10	NINJ1	-0.533913	5.99342	1248.5	0.0206321	0.178258
ENSG00000092841.19	MYL6	0.519001	10.3596	26077.1	0.0206844	0.17859
ENSG00000276805.2	AL133216.2	-0.83295	1.35023	50.0276	0.0207293	0.178858
ENSG00000223891.6	OSER1-DT	-0.660696	2.82003	139.016	0.0207447	0.178871
ENSG00000213190.4	MLLT11	0.515867	6.24774	1508.84	0.0207705	0.178973
ENSG00000152465.18	NMT2	-0.617991	5.07928	667.891	0.0208244	0.179319
ENSG00000111913.20	RIPOR2	-2.68869	0.499001	27.8785	0.0208486	0.179406
ENSG00000072849.11	DERL2	0.400413	5.42128	849.044	0.020923	0.179807
ENSG00000185813.11	PCYT2	-0.546139	6.73727	2099.62	0.0209226	0.179807
ENSG00000185624.15	P4HB	0.280058	10.2888	24797.3	0.0210839	0.181044
ENSG00000174516.15	PELI3	-0.459227	4.45682	432.23	0.0210951	0.181044
ENSG00000167543.16	TP53I13	0.401195	6.0328	1299.73	0.0212138	0.181941
ENSG00000050426.16	LETMD1	-0.407178	5.28676	770.296	0.0212427	0.182069
ENSG00000078098.14	FAP	0.8659	5.20681	736.581	0.0212847	0.182185
ENSG00000137177.20	KIF13A	-0.409753	6.87828	2325.69	0.0212795	0.182185
ENSG00000170537.13	TMC7	1.02216	1.42181	53.4764	0.0213922	0.182702
ENSG00000135931.18	ARMC9	-0.323649	7.40827	3342.63	0.0213996	0.182702
ENSG00000111906.18	HDDC2	-0.353024	5.56079	928.101	0.0213613	0.182702
ENSG00000150995.19	ITPR1	-0.515759	5.67687	1004.31	0.0214017	0.182702
ENSG00000131019.11	ULBP3	0.678757	3.26697	191.204	0.0214289	0.182813
ENSG00000077721.16	UBE2A	0.316455	6.64419	1980.28	0.0214588	0.182947
ENSG00000142156.15	COL6A1	-0.632124	10.2756	24891	0.0214742	0.182956
ENSG00000151229.13	SLC2A13	0.479633	3.33838	200.131	0.0215604	0.183327
ENSG00000105854.13	PON2	0.322882	6.46282	1747	0.0215502	0.183327
ENSG00000069011.16	PITX1	-0.512043	7.98472	5031.6	0.0215602	0.183327
ENSG00000142186.17	SCYL1	0.298671	7.26777	3053.17	0.0215774	0.183351
ENSG00000159423.17	ALDH4A1	-0.352882	5.82864	1116.07	0.0216189	0.183583
ENSG00000136868.11	SLC31A1	0.400892	5.86062	1152.96	0.0216706	0.1839
ENSG00000072195.15	SPEG	-0.413592	8.39463	6618.56	0.0217048	0.184069
ENSG00000139178.11	C1RL	-0.550996	4.84824	568.876	0.0218058	0.184804
ENSG00000142623.11	PADI1	1.65431	0.904706	37.0251	0.0218518	0.184829
ENSG00000150779.12	TIMM8B	0.434572	5.18537	719.351	0.0218359	0.184829
ENSG00000148057.16	IDNK	-0.6341	2.10611	84.9234	0.0218446	0.184829
ENSG00000197958.13	RPL12	-0.30713	9.28638	12313.6	0.0218831	0.184852
ENSG00000104687.14	GSR	-0.62569	6.55735	1853.13	0.0218694	0.184852
ENSG00000188732.11	FAM221A	-0.692965	1.81899	69.5679	0.0219269	0.1851
ENSG00000127418.15	FGFRL1	0.419976	7.49254	3582.15	0.0219492	0.185166
ENSG00000110013.13	SIAE	-0.342101	5.64641	987.302	0.0219831	0.185331
ENSG00000105993.15	DNAJB6	0.323218	6.90602	2373.72	0.0220386	0.185678
ENSG00000064205.10	CCN5	-2.04464	0.68836	31.7057	0.0220789	0.185895
ENSG00000164885.13	CDK5	0.38513	5.07219	665.867	0.0221392	0.186282
ENSG00000170899.11	GSTA4	-0.544126	3.79741	274.943	0.0222174	0.186817
ENSG00000169282.17	KCNAB1	1.07452	0.840005	35.6147	0.0222407	0.186879
ENSG00000145979.18	TBC1D7	0.514752	3.53607	229.939	0.0222563	0.186879
ENSG00000196205.8	EEF1A1P5	-0.435117	5.44858	862.414	0.0222682	0.186879
ENSG00000166598.15	HSP90B1	0.651896	9.36587	13118.2	0.0224734	0.188111
ENSG00000166889.14	PATL1	-0.428319	4.91195	592.588	0.0224331	0.188111
ENSG00000163050.17	COQ8A	-0.728376	5.11079	679.528	0.0224609	0.188111
ENSG00000135116.9	HRK	-1.00211	3.66615	243.419	0.0224469	0.188111
ENSG00000134049.6	IER3IP1	0.468691	4.35213	405.387	0.0225367	0.188518
ENSG00000088451.11	TGDS	0.559692	2.71423	130.361	0.0226244	0.189042
ENSG00000198642.7	KLHL9	-0.328977	5.51116	901.405	0.0226286	0.189042
ENSG00000138944.8	SHISAL1	0.661083	4.34892	398.949	0.022668	0.189055
ENSG00000100934.15	SEC23A	0.353177	7.22703	2976.34	0.022689	0.189055
ENSG00000160570.14	DEDD2	0.337802	5.31312	786.851	0.0226807	0.189055
ENSG00000258791.9	LINC00520	-1.18991	1.53749	57.9352	0.0226809	0.189055
ENSG00000166503.9	HDGFL3	0.454206	5.45331	869.653	0.0227459	0.189407
ENSG00000112996.11	MRPS30	-0.359858	4.8973	587.541	0.0227727	0.189507
ENSG00000132199.20	ENOSF1	-0.502842	4.22872	369.135	0.0227873	0.189507
ENSG00000115687.14	PASK	0.467503	4.04592	324.439	0.0228177	0.189637
ENSG00000058091.17	CDK14	-0.45088	3.71846	261.059	0.0228384	0.189687
ENSG00000230438.7	SERPINB9P1	-1.29244	1.28092	49.0377	0.0228639	0.189776
ENSG00000109066.14	TMEM104	0.302242	6.37125	1639.28	0.0228946	0.189908
ENSG00000053254.15	FOXN3	-0.590049	5.48376	880.485	0.0229274	0.190059
ENSG00000166398.14	GARRE1	0.465893	5.40266	839.768	0.0229954	0.190256
ENSG00000102226.10	USP11	-0.299147	6.29878	1553.8	0.0229686	0.190256
ENSG00000144488.15	ESPNL	-0.514336	3.17383	178.321	0.0229955	0.190256
ENSG00000132669.13	RIN2	0.453301	4.78888	547.837	0.023013	0.190278
ENSG00000231074.9	HCG18	0.401436	4.34841	403.065	0.0230401	0.19038
ENSG00000108821.14	COL1A1	1.74887	10.3731	26411.8	0.0230691	0.190498
ENSG00000150093.19	ITGB1	0.465031	11.1378	44862	0.0231346	0.190916
ENSG00000170962.13	PDGFD	-0.549249	4.84008	563.259	0.0231644	0.191039
ENSG00000163734.4	CXCL3	0.892751	1.84769	72.7876	0.0232311	0.191467
ENSG00000149948.14	HMGA2	-0.413585	5.36921	829.328	0.0233135	0.191901
ENSG00000163346.17	PBXIP1	-0.470864	8.14616	5586.95	0.0233112	0.191901
ENSG00000181649.8	PHLDA2	0.70107	6.58629	1919.51	0.023358	0.192144
ENSG00000141562.18	NARF	0.424872	5.19906	727.308	0.0234116	0.192339
ENSG00000115365.12	LANCL1	-0.289452	5.80378	1101.76	0.023406	0.192339
ENSG00000127585.12	FBXL16	1.26362	1.92656	76.4276	0.0234707	0.192579
ENSG00000164307.13	ERAP1	-0.461009	4.09294	338.238	0.0234683	0.192579
ENSG00000157916.20	RER1	0.316384	7.0569	2643.8	0.0235255	0.192906
ENSG00000117143.13	UAP1	0.651093	6.58972	1918.4	0.0235846	0.193268
ENSG00000143369.15	ECM1	-0.670888	6.48884	1781.62	0.0237571	0.194558
ENSG00000250103.2	PANCR	-0.817635	2.23978	92.8597	0.0238458	0.19516
ENSG00000148411.8	NACC2	-0.332332	7.57358	3749.07	0.0238727	0.195256
ENSG00000215808.4	LINC01139	-0.603758	2.8181	139.665	0.0239679	0.19591
ENSG00000064995.18	TAF11	0.437304	3.29363	194.085	0.0240264	0.196264
ENSG00000185507.21	IRF7	0.460162	3.69039	256.827	0.0241407	0.196823
ENSG00000101654.18	RNMT	-0.335039	5.4825	878.528	0.0241269	0.196823
ENSG00000166037.11	CEP57	-0.373038	4.05531	327.86	0.0241125	0.196823
ENSG00000124795.17	DEK	-0.443814	5.88633	1162.79	0.0241933	0.197128
ENSG00000068912.14	ERLEC1	0.280593	6.78252	2183.45	0.0243109	0.197878
ENSG00000143333.7	RGS16	-1.14537	0.694144	31.9597	0.0243162	0.197878
ENSG00000179051.14	RCC2	0.396452	5.3181	790.552	0.02438	0.198272
ENSG00000213523.10	SRA1	0.410695	5.76994	1083.13	0.0244612	0.198431
ENSG00000170456.16	DENND5B	0.367715	4.05039	325.977	0.0244191	0.198431
ENSG00000142949.17	PTPRF	0.312906	7.68596	4069.02	0.0244488	0.198431
ENSG00000106991.14	ENG	0.275506	7.65581	4010.82	0.0244434	0.198431
ENSG00000064601.19	CTSA	-0.437717	9.00543	10146	0.0244971	0.198472
ENSG00000056277.16	ZNF280C	-0.706612	1.76508	66.974	0.0244963	0.198472
ENSG00000166974.13	MAPRE2	-0.548997	6.28568	1550.2	0.0245766	0.198992
ENSG00000116685.16	KIAA2013	0.271078	7.14509	2804.2	0.0246328	0.199321
ENSG00000150907.10	FOXO1	-0.627679	3.24553	187.139	0.0246521	0.199353
ENSG00000164023.14	SGMS2	0.640958	5.568	938.555	0.0247762	0.199379
ENSG00000104450.13	SPAG1	0.625095	3.00114	158.293	0.0247204	0.199379
ENSG00000187961.14	KLHL17	0.523522	4.30616	392.853	0.0247762	0.199379
ENSG00000100345.22	MYH9	0.372056	11.571	59972	0.0247877	0.199379
ENSG00000165416.15	SUGT1	0.351492	5.68265	1018.17	0.0247059	0.199379
ENSG00000074201.9	CLNS1A	-0.291701	5.62566	975.584	0.0246915	0.199379
ENSG00000047315.17	POLR2B	-0.47314	6.42335	1697.07	0.0247767	0.199379
ENSG00000171425.10	ZNF581	-0.702281	4.21094	364.712	0.0247562	0.199379
ENSG00000150054.18	MPP7	-0.879191	2.59033	119.169	0.0247946	0.199379
ENSG00000011198.10	ABHD5	0.555263	5.06309	660.572	0.0248843	0.19985
ENSG00000004139.14	SARM1	-0.695873	3.90433	292.995	0.0248804	0.19985
ENSG00000187583.11	PLEKHN1	0.902401	1.69677	64.5413	0.0250501	0.200822
ENSG00000196954.14	CASP4	-0.534397	3.64238	248.301	0.0250521	0.200822
ENSG00000182175.14	RGMA	-1.28897	0.950662	38.0487	0.025035	0.200822
ENSG00000106665.16	CLIP2	-0.400005	7.02465	2565.33	0.0251623	0.201534
ENSG00000204991.11	SPIRE2	-0.588365	3.29105	192.927	0.0251722	0.201534
ENSG00000138061.12	CYP1B1	0.508144	9.94348	19459.5	0.0253375	0.202507
ENSG00000143183.17	TMCO1	0.371883	6.58021	1898.05	0.0253347	0.202507
ENSG00000012963.15	UBR7	-0.330868	4.86709	575.799	0.0253409	0.202507
ENSG00000087884.14	AAMDC	0.438071	3.73398	262.787	0.025389	0.202582
ENSG00000060138.13	YBX3	-0.269613	7.2688	3043.11	0.0253848	0.202582
ENSG00000167005.14	NUDT21	-0.284327	5.78529	1089.78	0.0253974	0.202582
ENSG00000155393.13	HEATR3	0.409511	4.24452	375.559	0.0254594	0.202951
ENSG00000090006.18	LTBP4	-0.741167	5.50832	898.313	0.0254914	0.20308
ENSG00000167536.14	DHRS13	-0.885973	1.64131	61.3108	0.0255744	0.203615
ENSG00000103064.15	SLC7A6	0.677367	3.56439	234.248	0.0256148	0.203766
ENSG00000115419.13	GLS	0.476642	8.67997	8105.8	0.0256308	0.203766
ENSG00000108784.10	NAGLU	-0.429212	7.23199	2964.08	0.0256408	0.203766
ENSG00000178537.10	SLC25A20	0.587679	4.8734	582.102	0.0256823	0.20397
ENSG00000105088.8	OLFM2	1.6687	1.65312	62.4234	0.0258918	0.205254
ENSG00000204172.12	AGAP9	0.961092	1.28937	48.6551	0.0258661	0.205254
ENSG00000162402.14	USP24	-0.342175	5.48115	882.214	0.0258894	0.205254
ENSG00000164330.17	EBF1	-1.10101	1.58558	58.9634	0.0259627	0.205689
ENSG00000148484.18	RSU1	0.40035	7.31569	3161.5	0.0260067	0.205911
ENSG00000153904.21	DDAH1	0.677658	8.11717	5459.35	0.0260234	0.205917
ENSG00000159216.19	RUNX1	0.432939	5.61375	966.615	0.0261	0.206289
ENSG00000175182.15	FAM131A	-0.456552	4.33811	399.263	0.0261024	0.206289
ENSG00000187398.12	LUZP2	1.21589	1.22366	45.2926	0.0261273	0.206359
ENSG00000233822.4	H2BC15	0.982806	1.54558	57.6171	0.0261702	0.206531
ENSG00000181523.13	SGSH	-0.295961	6.33899	1603.52	0.0261811	0.206531
ENSG00000160695.15	VPS11	-0.287306	5.80879	1104.79	0.0262042	0.206587
ENSG00000128228.5	SDF2L1	0.692874	5.20443	732.529	0.0263431	0.207504
ENSG00000107643.16	MAPK8	0.492507	4.27373	382.74	0.0263527	0.207504
ENSG00000198663.17	C6orf89	0.246678	7.50247	3586.37	0.0263717	0.207526
ENSG00000183091.19	NEB	0.891759	1.77924	67.5247	0.026389	0.207535
ENSG00000140367.12	UBE2Q2	0.31791	5.8262	1124.09	0.0264678	0.208028
ENSG00000204941.14	PSG5	1.27672	3.29183	192.649	0.0265484	0.208535
ENSG00000163870.16	TPRA1	0.426921	5.77283	1079.29	0.0267377	0.209457
ENSG00000023902.14	PLEKHO1	0.363344	7.31583	3146.81	0.0266845	0.209457
ENSG00000121067.19	SPOP	0.316079	5.98327	1249.99	0.026748	0.209457
ENSG00000054598.9	FOXC1	-0.306273	7.32995	3178.71	0.0267145	0.209457
ENSG00000081377.17	CDC14B	-0.499965	4.53787	457.826	0.0267634	0.209457
ENSG00000155511.18	GRIA1	-2.01682	0.529261	28.3545	0.026746	0.209457
ENSG00000138769.11	CDKL2	-0.601071	3.22162	184.16	0.0267972	0.209467
ENSG00000147251.15	DOCK11	-0.726336	3.49985	222.822	0.0267906	0.209467
ENSG00000110911.16	SLC11A2	-0.291822	5.72914	1046.88	0.0268212	0.209527
ENSG00000152784.16	PRDM8	-0.617687	3.65372	249.187	0.0268539	0.209656
ENSG00000156587.16	UBE2L6	-0.542491	5.76029	1074.04	0.0268892	0.209804
ENSG00000138463.9	SLC49A4	0.396901	4.5387	459.114	0.0270228	0.210719
ENSG00000197415.12	VEPH1	1.13189	4.14944	355.576	0.0271061	0.210985
ENSG00000211455.8	STK38L	0.72901	5.23154	743.213	0.0270933	0.210985
ENSG00000088280.19	ASAP3	-0.543793	5.37328	820.027	0.0270746	0.210985
ENSG00000259291.2	ZNF710-AS1	-0.923173	1.94494	75.6099	0.027127	0.211021
ENSG00000013375.16	PGM3	0.35577	5.85266	1147.56	0.0271483	0.211059
ENSG00000269190.6	FBXO17	-0.348318	5.49591	889.634	0.0272139	0.211441
ENSG00000132002.8	DNAJB1	0.269219	7.30227	3126.88	0.0273691	0.212519
ENSG00000181513.15	ACBD4	-0.585402	3.59198	237.328	0.0273902	0.212555
ENSG00000123684.13	LPGAT1	0.352178	5.79032	1094.84	0.02747	0.213046
ENSG00000136280.17	CCM2	0.283425	5.82815	1126.66	0.0275564	0.213587
ENSG00000127947.16	PTPN12	0.297373	5.42906	855.301	0.0276231	0.213975
ENSG00000150347.16	ARID5B	-0.413923	6.43947	1713.21	0.0276484	0.214043
ENSG00000139372.15	TDG	0.501695	4.15394	352.776	0.0276714	0.214092
ENSG00000101974.14	ATP11C	-0.456313	5.26513	760.941	0.0277428	0.214516
ENSG00000120915.14	EPHX2	-0.478357	3.22054	182.933	0.0277772	0.214652
ENSG00000118680.14	MYL12B	0.461193	8.62433	7820.87	0.0278145	0.214812
ENSG00000103187.8	COTL1	0.579067	9.09604	10800	0.0278591	0.214898
ENSG00000173320.12	STOX2	-0.906932	1.55295	57.3737	0.0278446	0.214898
ENSG00000169764.15	UGP2	0.38557	6.92632	2405.43	0.0279077	0.215145
ENSG00000146247.14	PHIP	-0.405776	4.56194	466.613	0.0279321	0.215204
ENSG00000239672.8	NME1	0.521375	4.912	597.511	0.0280287	0.215437
ENSG00000179222.18	MAGED1	0.347258	8.99899	10170.4	0.0280293	0.215437
ENSG00000177674.16	AGTRAP	0.34603	5.58724	952.927	0.0279972	0.215437
ENSG00000198455.4	ZXDB	-0.417359	3.4734	219.081	0.0280222	0.215437
ENSG00000283154.2	IQCJ-SCHIP1	0.75695	4.15748	352.411	0.0281019	0.21561
ENSG00000119138.4	KLF9	0.58897	5.0479	654.378	0.0281002	0.21561
ENSG00000102024.18	PLS3	0.388769	8.36181	6531.16	0.0280709	0.21561
ENSG00000130751.10	NPAS1	0.779947	4.53686	461.656	0.0281357	0.215612
ENSG00000174428.18	GTF2IRD2B	-0.459572	3.81287	277.124	0.028133	0.215612
ENSG00000156113.24	KCNMA1	0.427302	7.46092	3507.69	0.0282305	0.21621
ENSG00000103415.12	HMOX2	0.422572	5.92337	1201.43	0.0282632	0.216332
ENSG00000124789.12	NUP153	-0.303199	5.03609	647.453	0.0283171	0.216616
ENSG00000134215.16	VAV3	1.11607	2.23331	93.2835	0.0283796	0.216708
ENSG00000020577.14	SAMD4A	0.647767	6.19573	1447.64	0.0283685	0.216708
ENSG00000145675.15	PIK3R1	-0.330547	4.7384	527.048	0.0283686	0.216708
ENSG00000153037.15	SRP19	0.390513	3.72633	261.861	0.0283989	0.216727
ENSG00000112624.12	BICRAL	-0.581578	3.64519	246.178	0.0284723	0.217158
ENSG00000120837.8	NFYB	-0.457534	4.17332	354.218	0.0285474	0.217602
ENSG00000119401.10	TRIM32	0.544893	5.30545	782.3	0.028581	0.217729
ENSG00000147548.17	NSD3	-0.286174	5.86013	1146.34	0.0286156	0.217864
ENSG00000206503.13	HLA-A	-0.386412	9.36697	13016.8	0.0286616	0.218086
ENSG00000127914.17	AKAP9	0.409518	5.78436	1089.88	0.0287479	0.218613
ENSG00000239306.5	RBM14	0.431143	4.84693	568.86	0.0287721	0.218668
ENSG00000224945.1	AL353150.1	0.734642	1.86123	71.8926	0.0288039	0.218681
ENSG00000124749.17	COL21A1	-1.30431	3.25825	189.442	0.0288078	0.218681
ENSG00000143799.13	PARP1	-0.312979	6.63633	1962.94	0.028848	0.218857
ENSG00000169083.18	AR	-0.587268	4.60707	481.406	0.0288912	0.219056
ENSG00000184719.12	RNLS	-0.458374	3.42518	212.231	0.0289239	0.219175
ENSG00000158715.6	SLC45A3	0.802709	2.46565	110.302	0.0290448	0.219962
ENSG00000187630.17	DHRS4L2	-0.575701	3.04512	162.06	0.0291099	0.220326
ENSG00000163902.12	RPN1	0.377172	8.11039	5489.8	0.0292575	0.221248
ENSG00000155256.17	ZFYVE27	0.356711	5.13891	698.085	0.0292662	0.221248
ENSG00000175893.11	ZDHHC21	0.51553	4.63102	491.585	0.029382	0.221668
ENSG00000087302.9	RTRAF	0.342898	6.70617	2067.32	0.0294397	0.221668
ENSG00000144566.11	RAB5A	0.305895	5.83798	1132.14	0.0294159	0.221668
ENSG00000007080.11	CCDC124	0.287152	6.41193	1685.52	0.0293642	0.221668
ENSG00000153187.20	HNRNPU	-0.279941	8.29362	6192.77	0.0293908	0.221668
ENSG00000156508.18	EEF1A1	-0.293812	12.6688	128651	0.0293935	0.221668
ENSG00000134574.12	DDB2	-0.361879	5.3706	813.161	0.0294422	0.221668
ENSG00000156535.15	CD109	-0.753716	5.82427	1133.23	0.0296313	0.222962
ENSG00000137463.5	MGARP	-0.564446	3.60562	241.062	0.0297056	0.22339
ENSG00000244731.8	C4A	-0.955717	3.06121	165.092	0.0297368	0.223495
ENSG00000065882.16	TBC1D1	0.436504	6.28399	1543.44	0.0298723	0.224054
ENSG00000184164.15	CRELD2	0.435703	6.21295	1476.13	0.0298408	0.224054
ENSG00000146729.10	NIPSNAP2	-0.377044	5.24081	745.738	0.0298672	0.224054
ENSG00000167925.16	GHDC	-0.460527	4.87663	578.595	0.0298809	0.224054
ENSG00000040275.17	SPDL1	0.590091	3.91724	298.758	0.0299895	0.224087
ENSG00000079332.15	SAR1A	0.346826	7.23194	2986.13	0.0299632	0.224087
ENSG00000175701.10	MTLN	0.342475	4.62549	488.09	0.0299522	0.224087
ENSG00000166734.20	GOLM2	0.316709	7.03402	2599.94	0.0299653	0.224087
ENSG00000160710.17	ADAR	-0.247298	7.59456	3821.85	0.0299861	0.224087
ENSG00000054793.14	ATP9A	-0.358392	6.71706	2075.9	0.0299469	0.224087
ENSG00000111885.7	MAN1A1	-0.635768	5.84357	1138.61	0.0300122	0.224126
ENSG00000276180.1	H4C9	0.573295	3.95667	308.053	0.0301484	0.224882
ENSG00000140526.18	ABHD2	-0.33178	5.98005	1247.46	0.0301355	0.224882
ENSG00000197903.8	H2BC12	0.559316	6.00122	1271.04	0.0301883	0.225049
ENSG00000013275.8	PSMC4	0.292068	6.58727	1905.35	0.0302392	0.225299
ENSG00000119950.21	MXI1	-0.509455	4.86319	573.26	0.0302582	0.22531
ENSG00000135249.8	RINT1	0.41079	3.77285	270.761	0.0302987	0.225481
ENSG00000107554.17	DNMBP	0.594039	6.03184	1300.83	0.0303455	0.225699
ENSG00000021826.17	CPS1	-0.595868	2.82197	139.557	0.0303632	0.2257
ENSG00000143819.12	EPHX1	-0.612396	7.33452	3181.24	0.0304066	0.225893
ENSG00000183726.11	TMEM50A	0.277212	6.88097	2335.67	0.0306705	0.227722
ENSG00000164649.20	CDCA7L	-0.567185	3.0277	160.253	0.0306893	0.22773
ENSG00000100320.23	RBFOX2	-0.263946	7.10998	2736.37	0.0308027	0.228066
ENSG00000074410.14	CA12	-0.335318	10.5246	29157.9	0.0308054	0.228066
ENSG00000139974.16	SLC38A6	-0.431819	4.43916	428.381	0.030763	0.228066
ENSG00000141576.16	RNF157	-0.721505	2.29688	95.9502	0.0307897	0.228066
ENSG00000269386.5	RAB11B-AS1	0.638164	2.0119	79.8433	0.0309154	0.228727
ENSG00000070010.19	UFD1	0.34412	5.63134	983.937	0.0309301	0.228727
ENSG00000233491.8	AC008163.1	-1.42283	0.614152	30.7362	0.0309925	0.229057
ENSG00000185900.11	POMK	0.504072	3.91709	298.99	0.0310935	0.229671
ENSG00000170458.14	CD14	-0.903747	1.67826	63.8159	0.0311158	0.229704
ENSG00000163888.4	CAMK2N2	0.50166	3.62311	243.662	0.0311438	0.229779
ENSG00000068079.8	IFI35	-0.700187	4.9305	603.413	0.0311792	0.229909
ENSG00000139278.10	GLIPR1	0.651752	8.27695	6176.75	0.0312264	0.230125
ENSG00000131871.15	SELENOS	0.384867	5.77394	1086.46	0.0312584	0.230178
ENSG00000143149.12	ALDH9A1	-0.280385	6.52909	1824.03	0.0312711	0.230178
ENSG00000163071.11	SPATA18	-0.523205	3.97147	308.841	0.0312871	0.230178
ENSG00000154917.11	RAB6B	0.702609	4.60882	480.985	0.0313764	0.230374
ENSG00000184678.10	H2BC21	0.602645	5.10911	680.28	0.0313731	0.230374
ENSG00000086102.19	NFX1	-0.282548	5.55741	928.714	0.0313854	0.230374
ENSG00000181104.7	F2R	-0.548992	4.87952	585.537	0.0313495	0.230374
ENSG00000153982.11	GDPD1	0.796379	1.40182	52.4606	0.0314393	0.230531
ENSG00000075151.20	EIF4G3	-0.259658	7.36788	3266.22	0.0314604	0.230531
ENSG00000161249.21	DMKN	-0.835413	1.75846	65.6348	0.0314577	0.230531
ENSG00000090674.16	MCOLN1	0.439482	6.10005	1354.97	0.0315183	0.230824
ENSG00000123096.12	SSPN	-0.419025	4.56337	467.333	0.0315487	0.230915
ENSG00000135617.4	PRADC1	0.465354	4.72681	524.846	0.0315916	0.231073
ENSG00000147862.17	NFIB	-0.568215	4.31439	393.191	0.0316062	0.231073
ENSG00000162614.19	NEXN	0.537064	6.71247	2074	0.0316923	0.23144
ENSG00000178104.19	PDE4DIP	-0.281924	5.949	1219.81	0.0316888	0.23144
ENSG00000142173.16	COL6A2	-0.722692	10.4733	28477.6	0.0317171	0.23149
ENSG00000182325.11	FBXL6	0.396066	3.94125	305.127	0.0318118	0.23205
ENSG00000139154.16	AEBP2	-0.337126	4.89299	585.654	0.0318301	0.232051
ENSG00000068305.17	MEF2A	-0.35115	5.34152	799.87	0.0318564	0.232112
ENSG00000099992.16	TBC1D10A	0.449575	4.62343	488.914	0.0320102	0.23213
ENSG00000125459.17	MSTO1	0.427122	4.24159	375.391	0.0319192	0.23213
ENSG00000138018.18	SELENOI	0.371027	4.94644	611.781	0.0320261	0.23213
ENSG00000164323.14	CFAP97	-0.316555	5.20502	726.767	0.03195	0.23213
ENSG00000163629.13	PTPN13	-0.330895	5.46978	877.758	0.0320391	0.23213
ENSG00000103365.15	GGA2	-0.338648	6.27161	1517.34	0.0320358	0.23213
ENSG00000143507.18	DUSP10	-0.399427	5.22763	739.842	0.0320003	0.23213
ENSG00000121897.15	LIAS	-0.534402	3.13016	172.006	0.0320163	0.23213
ENSG00000206432.4	TMEM200C	-1.0618	2.72789	133.039	0.0318941	0.23213
ENSG00000154930.15	ACSS1	-1.32493	1.25464	47.328	0.0319577	0.23213
ENSG00000171873.8	ADRA1D	1.10704	1.42892	53.8432	0.0321293	0.232522
ENSG00000152767.17	FARP1	0.33226	5.72406	1046.22	0.0321242	0.232522
ENSG00000106025.9	TSPAN12	0.906365	1.53113	57.0957	0.0321582	0.232537
ENSG00000271643.2	AC112220.2	0.701276	3.11243	170.757	0.0322161	0.232537
ENSG00000165943.5	MOAP1	0.519943	5.9303	1204.39	0.0322216	0.232537
ENSG00000124357.13	NAGK	0.309286	7.29489	3116.32	0.0321916	0.232537
ENSG00000135472.9	FAIM2	-1.30691	2.15651	89.2573	0.0322134	0.232537
ENSG00000205189.12	ZBTB10	-0.448552	3.19258	180.18	0.0322589	0.232676
ENSG00000184271.17	POU6F1	-0.615757	3.23002	184.526	0.0322852	0.232735
ENSG00000101182.15	PSMA7	0.253693	7.65466	3994.61	0.0323088	0.232775
ENSG00000135372.9	NAT10	-0.350286	5.2846	769.894	0.032349	0.232804
ENSG00000138356.14	AOX1	-0.354123	5.55234	921.753	0.0323395	0.232804
ENSG00000168389.18	MFSD2A	1.18836	1.86876	72.872	0.0324057	0.233001
ENSG00000133169.6	BEX1	1.18516	2.37237	101.039	0.0324126	0.233001
ENSG00000174749.6	FAM241A	0.506041	2.754	133.326	0.0324601	0.233213
ENSG00000145526.12	CDH18	-1.19245	1.64097	61.8345	0.0324799	0.233225
ENSG00000146834.14	MEPCE	-0.36644	6.12154	1373.17	0.0325475	0.233581
ENSG00000197614.11	MFAP5	0.572477	5.78406	1080.56	0.0325998	0.233716
ENSG00000175970.11	UNC119B	-0.302767	5.99637	1261.28	0.0326027	0.233716
ENSG00000114127.10	XRN1	-0.362194	4.52433	455.324	0.032634	0.23381
ENSG00000158623.14	COPG2	-0.384741	4.94851	609.395	0.0326811	0.234018
ENSG00000155629.15	PIK3AP1	0.889462	1.66876	62.4294	0.0327631	0.234214
ENSG00000150961.15	SEC24D	0.371333	6.623	1961.4	0.032745	0.234214
ENSG00000118922.17	KLF12	-0.383471	4.11912	343.591	0.0327624	0.234214
ENSG00000110876.10	SELPLG	0.667296	4.80183	550.13	0.0327929	0.234297
ENSG00000158050.5	DUSP2	1.4598	2.02513	80.4684	0.0329416	0.234352
ENSG00000099949.21	LZTR1	0.29461	5.26032	759.75	0.0328702	0.234352
ENSG00000078674.18	PCM1	-0.301717	6.21105	1460.83	0.0329825	0.234352
ENSG00000126814.7	TRMT5	-0.381549	3.75865	266.945	0.0329021	0.234352
ENSG00000166710.20	B2M	-0.432236	10.4579	27712	0.0328609	0.234352
ENSG00000260230.4	FRRS1L	-0.453972	4.69009	507.324	0.0328514	0.234352
ENSG00000172830.13	SSH3	-0.478449	5.3582	810.493	0.0329427	0.234352
ENSG00000165983.14	PTER	-0.65406	1.83409	70.1395	0.0329497	0.234352
ENSG00000154639.19	CXADR	-0.664673	3.50858	225.584	0.0329772	0.234352
ENSG00000137642.13	SORL1	-0.779666	2.51216	112.008	0.0329518	0.234352
ENSG00000164713.10	BRI3	0.318141	8.54303	7373.95	0.0330333	0.234584
ENSG00000169299.14	PGM2	0.533135	4.84654	569.741	0.0331019	0.234941
ENSG00000117523.16	PRRC2C	-0.428454	7.09637	2703.64	0.0331332	0.235034
ENSG00000259426.6	AC027237.3	0.783426	1.95847	76.6479	0.0331851	0.235272
ENSG00000076043.11	REXO2	0.326899	6.72673	2093.9	0.0332296	0.235459
ENSG00000198910.14	L1CAM	2.09091	1.11374	41.7449	0.033283	0.235687
ENSG00000168090.10	COPS6	-0.326851	6.98253	2503.21	0.0332984	0.235687
ENSG00000160072.20	ATAD3B	0.355785	5.05303	659.861	0.0333759	0.23586
ENSG00000146433.9	TMEM181	0.307215	6.05542	1316.97	0.0333777	0.23586
ENSG00000198258.11	UBL5	0.247899	7.25453	3024.17	0.0333578	0.23586
ENSG00000087303.18	NID2	0.509193	5.48624	889.662	0.0334108	0.235896
ENSG00000120910.15	PPP3CC	0.439241	4.1185	343.677	0.033468	0.235896
ENSG00000129625.13	REEP5	0.304112	7.67877	4056.44	0.0335292	0.235896
ENSG00000177963.14	RIC8A	0.278175	7.46909	3501.03	0.0335118	0.235896
ENSG00000161533.12	ACOX1	0.26741	6.01791	1283.14	0.0335095	0.235896
ENSG00000108641.19	B9D1	-0.458138	3.70826	258.18	0.0335294	0.235896
ENSG00000274180.1	NATD1	-0.499102	5.73196	1042.2	0.0335043	0.235896
ENSG00000226742.4	HSBP1L1	-0.607062	2.54302	116.285	0.0334442	0.235896
ENSG00000277075.2	H2AC8	0.983114	0.905193	36.9772	0.033667	0.236571
ENSG00000126215.14	XRCC3	0.605408	3.1854	180.636	0.0336804	0.236571
ENSG00000166471.11	TMEM41B	0.315965	4.63318	491.109	0.0336746	0.236571
ENSG00000132549.18	VPS13B	-0.321984	5.03982	650.82	0.0337431	0.236882
ENSG00000127022.15	CANX	0.296085	9.54975	14869.8	0.0338238	0.237319
ENSG00000267519.6	AC020916.1	0.707909	4.11169	344.148	0.0338676	0.237497
ENSG00000286067.1	AC004263.2	0.913734	1.10065	42.6824	0.0340783	0.238765
ENSG00000097033.14	SH3GLB1	0.301942	6.76792	2160.48	0.0340854	0.238765
ENSG00000063176.16	SPHK2	-0.332824	5.37723	821.338	0.0341385	0.239006
ENSG00000067715.14	SYT1	0.730615	2.3429	101.01	0.0342373	0.239438
ENSG00000187800.13	PEAR1	-1.10943	4.76989	550.822	0.0342327	0.239438
ENSG00000102172.16	SMS	0.562205	6.95073	2454.85	0.0342831	0.239498
ENSG00000185019.17	UBOX5	-0.421308	3.26786	190.115	0.0342804	0.239498
ENSG00000173511.9	VEGFB	-0.292682	7.70167	4103.75	0.0343089	0.239549
ENSG00000162923.16	WDR26	-0.288368	7.03058	2590.82	0.0343909	0.239745
ENSG00000115525.18	ST3GAL5	-0.625886	5.58063	948.744	0.0343618	0.239745
ENSG00000189320.9	FAM180A	-0.817478	3.676	255.141	0.0343928	0.239745
ENSG00000137692.12	DCUN1D5	0.331961	5.01943	642.737	0.0344669	0.240131
ENSG00000058866.15	DGKG	1.03586	2.26401	96.7817	0.034488	0.240149
ENSG00000068137.15	PLEKHH3	-0.370611	5.20796	730.356	0.0347644	0.241942
ENSG00000105327.18	BBC3	-0.710312	4.3412	398.752	0.0348535	0.242431
ENSG00000104067.16	TJP1	-0.295502	6.08553	1340.89	0.034889	0.242547
ENSG00000172613.8	RAD9A	0.500529	3.17473	178.549	0.034959	0.242903
ENSG00000124920.14	MYRF	-0.548137	4.43084	422.213	0.0350029	0.243077
ENSG00000076706.17	MCAM	0.573554	9.57914	15006.5	0.0351073	0.243146
ENSG00000100325.15	ASCC2	0.285853	6.09848	1357.13	0.0350825	0.243146
ENSG00000107186.16	MPDZ	-0.3224	5.77036	1075.53	0.0350989	0.243146
ENSG00000165802.23	NSMF	-0.404818	6.56256	1865.96	0.0350904	0.243146
ENSG00000153721.19	CNKSR3	-0.492032	3.00312	158.204	0.0350727	0.243146
ENSG00000141027.21	NCOR1	-0.295055	5.86872	1156.17	0.035136	0.243214
ENSG00000127334.11	DYRK2	0.422556	5.21275	732.62	0.0351633	0.243269
ENSG00000147133.16	TAF1	-0.303821	4.89231	586.209	0.0351855	0.243269
ENSG00000123453.18	SARDH	-0.828119	2.55149	116.31	0.0352006	0.243269
ENSG00000008311.15	AASS	-0.398571	3.85275	283.988	0.0352492	0.243474
ENSG00000132405.19	TBC1D14	-0.368289	4.30137	389.117	0.0353252	0.243869
ENSG00000181019.13	NQO1	-0.663795	9.17358	11387	0.0353874	0.244036
ENSG00000169744.13	LDB2	-0.69314	4.51164	451.327	0.0353695	0.244036
ENSG00000184220.12	CMSS1	0.407696	4.00455	317.92	0.0354305	0.244203
ENSG00000237765.8	FAM200B	0.528035	3.43018	213.118	0.0355335	0.244782
ENSG00000101638.14	ST8SIA5	0.888406	2.16302	88.898	0.035589	0.244999
ENSG00000150540.14	HNMT	-0.748815	2.38649	102.293	0.0356221	0.244999
ENSG00000167617.3	CDC42EP5	-0.820445	3.01328	161.567	0.0356188	0.244999
ENSG00000215251.4	FASTKD5	0.353003	4.10902	341.671	0.0357812	0.245962
ENSG00000130332.15	LSM7	0.297512	5.01751	641.714	0.0358965	0.246623
ENSG00000253368.4	TRNP1	0.511864	6.04343	1304.26	0.0359937	0.24716
ENSG00000141510.18	TP53	-0.36403	5.69897	1023.26	0.0360557	0.24719
ENSG00000159231.6	CBR3	-0.799768	2.26446	94.605	0.0360408	0.24719
ENSG00000147257.15	GPC3	-0.904874	3.71663	260.691	0.0360223	0.24719
ENSG00000136842.14	TMOD1	-0.866871	2.30643	96.9544	0.0361274	0.247549
ENSG00000110328.6	GALNT18	0.688577	4.01159	316.549	0.0364171	0.24918
ENSG00000197548.12	ATG7	-0.31944	4.53762	459.662	0.036389	0.24918
ENSG00000130707.18	ASS1	-0.351621	6.41331	1675.28	0.0364234	0.24918
ENSG00000146205.14	ANO7	0.762364	1.25237	47.1876	0.0364643	0.249254
ENSG00000163257.11	DCAF16	-0.32819	4.68516	508.092	0.0364729	0.249254
ENSG00000179933.6	C14orf119	0.260396	5.74864	1063	0.0365304	0.249515
ENSG00000244694.7	PTCHD4	-0.564783	3.1174	171.761	0.0365516	0.249527
ENSG00000123159.16	GIPC1	0.31487	7.97586	4989.7	0.0366473	0.249921
ENSG00000186522.15	SEPTIN10	-0.260389	6.24416	1500.66	0.036648	0.249921
ENSG00000171714.12	ANO5	-0.520891	3.54649	229.918	0.0366857	0.250045
ENSG00000114251.14	WNT5A	0.652141	4.83499	569.94	0.0367253	0.250183
ENSG00000165916.8	PSMC3	0.299005	7.07585	2675.81	0.0368184	0.250552
ENSG00000213563.7	C8orf82	-0.401624	5.72315	1041.52	0.0368079	0.250552
ENSG00000159884.12	CCDC107	0.478032	4.06694	331.46	0.0368902	0.250908
ENSG00000136274.9	NACAD	-0.452627	3.89705	294.283	0.0369277	0.25103
ENSG00000213903.9	LTB4R	0.677701	2.48626	110.695	0.0370104	0.251328
ENSG00000205155.8	PSENEN	0.407902	3.82873	281.805	0.0369925	0.251328
ENSG00000244187.8	TMEM141	0.413291	3.89408	294.801	0.0371903	0.252034
ENSG00000137693.14	YAP1	-0.286751	7.17135	2854.68	0.0371831	0.252034
ENSG00000108262.16	GIT1	-0.326189	6.03656	1295.78	0.0372111	0.252034
ENSG00000112874.10	NUDT12	-0.419783	3.87624	289.39	0.0372122	0.252034
ENSG00000011523.14	CEP68	-0.461976	4.25484	376.235	0.03717	0.252034
ENSG00000170190.16	SLC16A5	-0.726799	3.05529	163.281	0.0372583	0.252213
ENSG00000189159.16	JPT1	0.66497	6.42283	1709.34	0.0373185	0.252268
ENSG00000166557.14	TMED3	0.30201	7.81766	4473.95	0.0373488	0.252268
ENSG00000092201.10	SUPT16H	-0.347707	6.65438	1985.55	0.0373229	0.252268
ENSG00000124406.16	ATP8A1	-0.871489	1.46324	54.3434	0.0373643	0.252268
ENSG00000127951.7	FGL2	-1.09472	1.17546	45.5371	0.0373622	0.252268
ENSG00000188493.15	C19orf54	-0.56183	3.6179	241.499	0.0373924	0.252325
ENSG00000078369.18	GNB1	0.322606	9.1698	11414.4	0.0374165	0.252356
ENSG00000079841.18	RIMS1	0.680014	3.54456	231.881	0.0374717	0.252595
ENSG00000260428.3	SCX	0.864891	2.9646	154.7	0.0375312	0.252732
ENSG00000173482.17	PTPRM	-0.471618	6.85963	2293.6	0.0375251	0.252732
ENSG00000157111.13	TMEM171	0.68352	3.96508	309.86	0.0375962	0.253037
ENSG00000235437.8	LINC01278	0.350049	4.53358	457.009	0.0376464	0.253111
ENSG00000107404.20	DVL1	0.239394	7.29442	3110.92	0.0376388	0.253111
ENSG00000175727.14	MLXIP	0.351704	6.73723	2109.66	0.0377197	0.253471
ENSG00000122966.16	CIT	-0.64863	4.1533	351.728	0.0377824	0.253761
ENSG00000213516.10	RBMXL1	-0.414664	3.44292	214.323	0.0378053	0.253782
ENSG00000128596.17	CCDC136	-0.407574	4.01667	318.483	0.0378663	0.254059
ENSG00000102158.20	MAGT1	0.292946	7.10041	2719.2	0.0378973	0.254135
ENSG00000128915.12	ICE2	-0.319639	4.43683	427.629	0.0379946	0.254655
ENSG00000235257.9	ITGA9-AS1	-0.745094	1.2848	47.9554	0.0380336	0.254783
ENSG00000261061.1	AC092718.4	0.699113	1.8089	69.1878	0.0381043	0.254861
ENSG00000105329.10	TGFB1	0.606118	8.40798	6762.04	0.0380879	0.254861
ENSG00000015532.10	XYLT2	0.289272	6.39962	1679.14	0.0381045	0.254861
ENSG00000153066.12	TXNDC11	0.428271	5.37882	825.245	0.0382318	0.255309
ENSG00000105755.8	ETHE1	0.372104	4.56349	467.615	0.0382508	0.255309
ENSG00000163754.18	GYG1	-0.296907	6.35109	1613	0.0382367	0.255309
ENSG00000134146.12	DPH6	-0.616604	1.83605	70.4598	0.0382203	0.255309
ENSG00000161203.13	AP2M1	0.318935	10.0029	20313.8	0.0382975	0.255489
ENSG00000214706.10	IFRD2	0.330235	5.81161	1110.83	0.0383622	0.255514
ENSG00000163882.9	POLR2H	0.314941	5.16247	709.488	0.0383806	0.255514
ENSG00000151135.10	TMEM263	0.303177	6.66905	2019.44	0.0383518	0.255514
ENSG00000141934.10	PLPP2	-0.716607	3.89111	301.566	0.0383627	0.255514
ENSG00000139182.15	CLSTN3	0.352874	5.63691	988.659	0.0384439	0.255722
ENSG00000103316.12	CRYM	-1.16085	1.08572	42.4327	0.0384516	0.255722
ENSG00000149596.7	JPH2	0.905953	5.61922	966.303	0.0385282	0.256099
ENSG00000052795.13	FNIP2	0.463117	4.70798	515.688	0.0386929	0.256929
ENSG00000006757.12	PNPLA4	-0.68856	2.88313	146.2	0.0386883	0.256929
ENSG00000148672.9	GLUD1	-0.26096	6.90219	2368.57	0.0387751	0.257219
ENSG00000196139.14	AKR1C3	-0.967205	4.97026	620.907	0.0387766	0.257219
ENSG00000279207.1	AC015813.6	0.478092	2.90086	147.933	0.0388033	0.257264
ENSG00000150556.17	LYPD6B	0.922143	3.00752	156.876	0.0389956	0.257875
ENSG00000183255.12	PTTG1IP	0.359188	9.58417	15225.1	0.0389322	0.257875
ENSG00000138032.21	PPM1B	-0.495128	3.27664	190.913	0.0389789	0.257875
ENSG00000134070.5	IRAK2	-0.614752	2.76874	134.125	0.0389443	0.257875
ENSG00000145390.11	USP53	-0.636548	5.64857	994.977	0.0389731	0.257875
ENSG00000070495.15	JMJD6	0.497238	4.65987	500.562	0.0390203	0.257906
ENSG00000113811.11	SELENOK	0.311824	5.61534	971.783	0.0390969	0.25828
ENSG00000153071.15	DAB2	-0.452461	8.51835	7335.8	0.0392472	0.25914
ENSG00000088899.15	LZTS3	-0.370497	4.81368	554.448	0.0394832	0.260565
ENSG00000172530.20	BANP	0.345154	3.95232	306.251	0.0395941	0.261163
ENSG00000114988.12	LMAN2L	0.31325	5.54573	926.497	0.0396441	0.261359
ENSG00000146085.8	MMUT	-0.266756	5.62369	970.985	0.0396909	0.261534
ENSG00000258947.7	TUBB3	1.0097	1.37646	52.0407	0.0397837	0.261731
ENSG00000177943.14	MAMDC4	0.797202	2.26992	95.3912	0.0397468	0.261731
ENSG00000115306.16	SPTBN1	-0.2468	8.65662	7999.85	0.0397877	0.261731
ENSG00000104823.9	ECH1	-0.384199	4.97345	621.142	0.0398021	0.261731
ENSG00000114742.14	WDR48	-0.323034	5.16366	707.993	0.0398438	0.261738
ENSG00000204366.4	ZBTB12	-0.634863	2.66428	124.907	0.0398327	0.261738
ENSG00000114554.11	PLXNA1	0.23866	7.40348	3361.83	0.0399042	0.261912
ENSG00000100116.17	GCAT	-0.396239	4.79948	549.49	0.039911	0.261912
ENSG00000104290.11	FZD3	0.756047	1.2198	46.0356	0.0399875	0.262147
ENSG00000138246.17	DNAJC13	-0.268459	6.35169	1613.99	0.0399706	0.262147
ENSG00000111341.10	MGP	-0.774	7.03021	2578.32	0.0400261	0.262266
ENSG00000148297.16	MED22	-0.31312	5.59554	954.754	0.0400876	0.262297
ENSG00000233476.3	EEF1A1P6	-0.497054	3.39726	207.822	0.0400918	0.262297
ENSG00000151773.13	CCDC122	-0.520566	2.47919	110.036	0.0400689	0.262297
ENSG00000153485.6	TMEM251	0.551604	3.0981	168.749	0.0401278	0.262399
ENSG00000186298.12	PPP1CC	-0.267356	6.1285	1381.66	0.0401963	0.262405
ENSG00000126216.15	TUBGCP3	-0.378238	3.77511	270.473	0.0402081	0.262405
ENSG00000132846.6	ZBED3	-0.639893	2.96897	153.575	0.0401613	0.262405
ENSG00000135437.10	RDH5	-0.976166	2.53101	114.422	0.0402102	0.262405
ENSG00000179889.19	PDXDC1	0.240586	6.68023	2030.74	0.0402353	0.262436
ENSG00000066855.16	MTFR1	0.333388	4.5593	466.156	0.0402918	0.26259
ENSG00000123992.19	DNPEP	-0.346007	5.52782	909.542	0.0403144	0.26259
ENSG00000163214.21	DHX57	-0.351575	4.7585	535.869	0.04032	0.26259
ENSG00000174705.13	SH3PXD2B	-0.385013	6.91351	2381.98	0.0403624	0.262733
ENSG00000139998.16	RAB15	0.409483	3.53889	231.614	0.0404266	0.262909
ENSG00000174851.16	YIF1A	0.344412	7.17165	2861.23	0.0404302	0.262909
ENSG00000197965.12	MPZL1	0.394096	7.47973	3532.14	0.0405042	0.263124
ENSG00000198034.11	RPS4X	-0.343754	9.15896	11296.8	0.0404868	0.263124
ENSG00000164086.10	DUSP7	0.446977	4.52519	455.938	0.0405475	0.263272
ENSG00000136295.15	TTYH3	0.340283	7.22241	2974.11	0.0406288	0.263668
ENSG00000064687.13	ABCA7	-0.591241	4.43244	424.762	0.0406885	0.263922
ENSG00000005436.14	GCFC2	-0.449574	3.34024	199.536	0.0407561	0.264228
ENSG00000116273.6	PHF13	-0.383897	4.94891	609.112	0.0407966	0.264357
ENSG00000120896.13	SORBS3	-0.381215	7.19499	2886.33	0.0408252	0.26441
ENSG00000265681.7	RPL17	0.448092	4.07762	334.099	0.0409233	0.264883
ENSG00000035141.8	FAM136A	0.333869	4.80164	551.826	0.0409599	0.264883
ENSG00000115317.12	HTRA2	0.317976	4.6357	491.597	0.0409556	0.264883
ENSG00000167114.13	SLC27A4	0.35406	6.32961	1593.67	0.041106	0.26508
ENSG00000102100.16	SLC35A2	0.348747	5.18179	719.409	0.0411346	0.26508
ENSG00000025796.14	SEC63	0.289214	6.63752	1971.38	0.0411069	0.26508
ENSG00000164754.15	RAD21	-0.273611	6.25061	1503.35	0.0411292	0.26508
ENSG00000150281.7	CTF1	-0.406797	4.01032	317.439	0.0410133	0.26508
ENSG00000099377.14	HSD3B7	-0.412348	3.69342	255.924	0.04105	0.26508
ENSG00000171444.18	MCC	-0.53612	4.07276	332.597	0.0411088	0.26508
[truncated: 10,883 more rows]
