# Supplementary material for: Genome-Wide RNA Sequencing of Human Trabecular Meshwork Cells Treated with TGF-β1: Relevance to Pseudoexfoliation Glaucoma
Source: Biomolecules. 2022 Nov 15;12(11):1693. doi: 10.3390/biom12111693 (PMC9687758; doi:10.3390/biom12111693)
Supplement: Supplementary file 1 [file biomolecules-12-01693-s001.zip › Table_S3.xlsx]

## Sheet: Sheet1
cluster.nr	cluster.name	enrichment.id	enrichment.name	enrichment.pval	enrichment.genes
1	fibroblast proliferation ; G1/S	GO:0042127	BP -regulation of cell population proliferation	4.89563e-07	IRS1,ELN,HTR2B,PKD2,ESM1,RPS6KA2,CTSH,ITGAV,TNS2,KLF10,IL11,IGFBP3,MAGI2,TBC1D8,P3H1,EMP2,NRG1,AXIN2,NGF,PRLR,TGFBR1,GREM1,SFRP1,ARHGEF2,HBEGF,KANK2,NPR3,PTN,DPP4,SCIN,GPNMB,SERTAD1,CLMN,LMNA,SSR1,S1PR3,E2F7,STAT5A,XBP1,CDKN2A,VDR,LIF,VEGFC,INHBA,SOD2,AGT,VEGFA,BMP4,EPGN,KITLG,DLG3,NOX4,MELTF,LGMN
1	fibroblast proliferation ; G1/S	GO:0008285	BP -negative regulation of cell population proliferation	8.55017e-06	KANK2,PKD2,SCIN,GPNMB,CLMN,RPS6KA2,LMNA,IL12A,SLC16A2,TNS2,E2F7,KLF10,CDKN2A,VDR,IGFBP3,NOG,MAGI2,P3H1,INHBA,AXIN2,NGF,SOD2,MTSS1,BMP4,GREM1,TGFBR3,SFRP1,DLG3,NOX4,PPARG,B4GALT7
1	fibroblast proliferation ; G1/S	GO:0008284	BP -positive regulation of cell population proliferation	8.697e-06	IRS1,HTR2B,PTN,AQP1,DPP4,ESM1,SERTAD1,RBPMS2,SSR1,CTSH,ITGAV,S1PR3,IL11,XBP1,SPHK1,LIF,TBC1D8,VEGFC,EMP2,NRG1,PRLR,AGT,TGFBR1,VEGFA,BMP4,GREM1,TGFBR3,SFRP1,EPGN,KITLG,GAS6,TOX,ZFPM2,LGMN,HBEGF,DDR2
1	fibroblast proliferation ; G1/S	GO:0048522	BP -positive regulation of cellular process	3.09273e-05	TENM4,IRS1,CITED2,HTR2B,AKAP6,PTN,DPP4,ESM1,SERTAD1,PPP1R13L,LMNA,SSR1,CTSH,ITGAV,IL12A,S1PR3,CCN2,IL11,XBP1,FZD7,SPHK1,TPM1,LIF,TBC1D8,VEGFC,EMP2,NRG1,AXIN2,DKK1,PRLR,TGFBR1,VEGFA,P2RX7,BMP4,GREM1,SFRP1,EPGN,KITLG,GAS6,TLR4,LGMN,HBEGF
1	fibroblast proliferation ; G1/S	GO:0034393	BP -positive regulation of smooth muscle cell apoptotic process	0.000153197	CDKN2A,IL12A,PPARG,SOD2
1	fibroblast proliferation ; G1/S	GO:0061097	BP -regulation of protein tyrosine kinase activity	0.000328451	GPRC5B,RAP2B,SH3BP5L,DLG3,NOX4,GAS6,AGT
1	fibroblast proliferation ; G1/S	GO:0071295	BP -cellular response to vitamin	0.000386461	POSTN,SFRP1,GAS6
1	fibroblast proliferation ; G1/S	GO:0061098	BP -positive regulation of protein tyrosine kinase activity	0.000526831	EPGN,GPRC5B,DLG3,NOX4,GAS6,AGT,HBEGF
1	fibroblast proliferation ; G1/S	GO:0050731	BP -positive regulation of peptidyl-tyrosine phosphorylation	0.000743384	IL11,ITGB3,LIF,AGT,VEGFA,GREM1,GPRC5B,DLG3,NOX4,IL12A,ARHGEF2,ITGA5,GAS6
1	fibroblast proliferation ; G1/S	GO:0090184	BP -positive regulation of kidney development	0.000753108	BMP4,FOXD1,NOG
1	fibroblast proliferation ; G1/S	GO:0048145	BP -regulation of fibroblast proliferation	0.000927976	SFRP1,SPHK1,GAS6,B4GALT7,AGT,AQP1,DDR2
1	fibroblast proliferation ; G1/S	GO:0050679	BP -positive regulation of epithelial cell proliferation	0.00111643	STAT5A,BMP4,SFRP1,XBP1,EPGN,FZD7,ITGB3,HTR2B,VEGFC,PTN,TGFBR1,VEGFA
1	fibroblast proliferation ; G1/S	GO:1902807	BP -negative regulation of cell cycle G1/S phase transition	0.00113069	KANK2,GPNMB,CDKN2A,CDK2AP2,PKD2,E2F7
1	fibroblast proliferation ; G1/S	GO:0048523	BP -negative regulation of cellular process	0.00127157	KANK2,DYSF,HTR2B,PKD2,BRINP1,SCIN,GPNMB,CLMN,RPS6KA2,LMNA,CCN2,EPHB2,E2F7,TNS2,PLXNA3,APOBEC3C,KLF10,CDKN2A,VDR,IGFBP3,MAGI2,P3H1,INHBA,AXIN2,NGF,SOD2,RHOB,BMP4,TGFBR3,SFRP1,DLG3,NOX4,TGFBI,TNFRSF21
1	fibroblast proliferation ; G1/S	GO:2000134	BP -negative regulation of G1/S transition of mitotic cell cycle	0.00152773	KANK2,GPNMB,CDKN2A,CDK2AP2,PKD2,E2F7
1	fibroblast proliferation ; G1/S	GO:0045785	BP -positive regulation of cell adhesion	0.00169801	ECM2,CITED2,TPM1,LIF,IL12A,ITGAV,FSTL3,SMAD7,VEGFA
1	fibroblast proliferation ; G1/S	GO:0031341	BP -regulation of cell killing	0.00232214	IL11,CFH,FZD7,ICAM1
1	fibroblast proliferation ; G1/S	GO:0002690	BP -positive regulation of leukocyte chemotaxis	0.00242222	SERPINE1,VEGFC,IL12A,PTN,GAS6,VEGFA,LGMN
1	fibroblast proliferation ; G1/S	GO:0048146	BP -positive regulation of fibroblast proliferation	0.00243274	SPHK1,GAS6,AGT,AQP1,DDR2
1	fibroblast proliferation ; G1/S	GO:0045687	BP -positive regulation of glial cell differentiation	0.00290504	SERPINE2,TENM4,BIN1,PTN
1	fibroblast proliferation ; G1/S	GO:0048018	MF -receptor ligand activity	9.49381e-08	SEMA7A,WNT2B,SEMA3C,SEMA3B,TNFRSF11B,PTN,ERFE,DPP4,GPNMB,IL12A,FAM3C,LEFTY2,IL11,WNT5B,WNT7B,LIF,VEGFC,NRG1,INHBA,NGF,DKK1,AGT,VEGFA,BMP4,GREM1,GREM2,EPGN,KITLG,VGF,GAS6,HBEGF
1	fibroblast proliferation ; G1/S	GO:0008083	MF -growth factor activity	8.42066e-06	IL11,LIF,VEGFC,NRG1,PTN,INHBA,NGF,DKK1,AGT,VEGFA,EPGN,IL12A,HBEGF
1	fibroblast proliferation ; G1/S	GO:0005172	MF -vascular endothelial growth factor receptor binding	3.09628e-05	GREM1,ITGB3,VEGFC,ITGA5,VEGFA
1	fibroblast proliferation ; G1/S	GO:0043184	MF -vascular endothelial growth factor receptor 2 binding	8.74962e-05	GREM1,ITGB3,ITGA5,VEGFA
2	ECM remodelling	REAC:R-HSA-1474244	Extracellular matrix organization Homo sapiens	3.11015e-14	VCAN,ELN,P4HA2,COL4A4,ITGB5,ITGAE,ICAM1,TLL2,LAMA1,MMP15,PCOLCE,SERPINE1,LOX,SPARC,P3H1,LTBP2,P4HA1,BMP4,MMP24,COLGALT1,PXDN,COL5A1,LAMA5,LOXL2,COL4A2,ADAM19,ITGAV,FBN2,FURIN,CTSK,ADAM12,SERPINH1,NCAM1,PLOD2,ITGA5,DDR2,ITGA2,CTSB,FBN1,A2M,COL4A1,COL14A1,COL5A2,ITGB3
2	ECM remodelling	REAC:R-HSA-1566948	Elastic fibre formation Homo sapiens	8.01984e-09	ELN,ITGB5,LOX,LTBP2,BMP4,LOXL2,ITGAV,FBN2,FURIN,ITGA5,FBN1,ITGB3
2	ECM remodelling	REAC:R-HSA-1474290	Collagen formation Homo sapiens	2.84823e-08	P4HA2,COL4A4,TLL2,PCOLCE,LOX,P3H1,P4HA1,COLGALT1,PXDN,COL5A1,LOXL2,COL4A2,SERPINH1,PLOD2,CTSB,COL4A1,COL14A1,COL5A2
2	ECM remodelling	REAC:R-HSA-1650814	Collagen biosynthesis and modifying enzymes Homo sapiens	1.84019e-07	P4HA2,COL4A4,TLL2,PCOLCE,P3H1,P4HA1,COLGALT1,COL5A1,COL4A2,SERPINH1,PLOD2,COL4A1,COL14A1,COL5A2
2	ECM remodelling	REAC:R-HSA-2022090	Assembly of collagen fibrils and other multimeric structures Homo sapiens	1.33982e-05	COL4A4,TLL2,PCOLCE,LOX,PXDN,COL5A1,LOXL2,COL4A2,CTSB,COL4A1,COL14A1,COL5A2
2	ECM remodelling	REAC:R-HSA-3000178	ECM proteoglycans Homo sapiens	1.58755e-05	VCAN,COL4A4,ITGB5,LAMA1,SERPINE1,SPARC,COL5A1,LAMA5,COL4A2,ITGAV,NCAM1,ITGA2,COL4A1,COL5A2,ITGB3
2	ECM remodelling	REAC:R-HSA-216083	Integrin cell surface interactions Homo sapiens	1.66106e-05	COL4A4,ITGB5,ITGAE,ICAM1,COL5A1,COL4A2,ITGAV,ITGA5,ITGA2,FBN1,COL4A1,COL5A2,ITGB3
2	ECM remodelling	REAC:R-HSA-2243919	Crosslinking of collagen fibrils Homo sapiens	0.000153197	COL4A4,TLL2,PCOLCE,LOX,PXDN,LOXL2,COL4A2,COL4A1
2	ECM remodelling	REAC:R-HSA-3000171	Non-integrin membrane-ECM interactions Homo sapiens	0.000526831	COL4A4,ITGB5,LAMA1,COL5A1,LAMA5,COL4A2,ITGAV,DDR2,ITGA2,COL4A1,COL5A2,ITGB3
2	ECM remodelling	GO:0030198	BP -extracellular matrix organization	3.3438e-22	SPARC,ECM2,ITGB5,COL14A1,ELN,ITGB3,SERPINE1,PLOD2,ITGAE,ICAM1,LOXL2,MMP24,CTSK,ITGAV,COLGALT1,ADAMTS6,POSTN,ITGA2,APLP1,P3H1,P3H4,TGFBR1,ADAM19,GREM1,VCAN,COL4A2,LOX,MMP15,COL4A1,COL4A4,PXDN,ADAM12,ITGA5,LCP1,GAS6,DDR2,FBN2,LAMA5,LAMA1,FURIN,HAS1,SERPINH1,A2M,COL5A1,P4HA1,P4HA2,SMOC1,COL5A2,TLL2,TGFBI,RECK,FBN1
2	ECM remodelling	GO:0043062	BP -extracellular structure organization	5.749e-16	FBN2,LAMA5,SPARC,ECM2,ITGB5,COL14A1,LAMA1,ELN,ITGB3,SERPINE1,FURIN,ITGAE,ICAM1,MMP24,ITGAV,ADAMTS6,POSTN,ITGA2,APLP1,TGFBR1,ADAM19,VCAN,COL4A2,LOX,COL5A1,MMP15,COL4A1,SMOC1,COL4A4,PXDN,ADAM12,COL5A2,TGFBI,ITGA5,RECK,DDR2,FBN1
2	ECM remodelling	GO:0045229	BP -external encapsulating structure organization	4.04477e-15	FBN2,LAMA5,SPARC,ECM2,ITGB5,COL14A1,LAMA1,ELN,ITGB3,SERPINE1,FURIN,ITGAE,ICAM1,MMP24,ITGAV,ADAMTS6,POSTN,ITGA2,APLP1,ADAM19,VCAN,COL4A2,LOX,COL5A1,MMP15,COL4A1,SMOC1,COL4A4,PXDN,ADAM12,COL5A2,TGFBI,ITGA5,RECK,DDR2,FBN1
2	ECM remodelling	GO:0030199	BP -collagen fibril organization	1.79911e-11	COL14A1,P3H1,PLOD2,P3H4,TGFBR1,LOXL2,GREM1,COL4A2,LOX,COL5A1,P4HA1,COL4A1,P4HA2,COL4A4,PXDN,COL5A2,SERPINH1,TLL2,COLGALT1,DDR2
2	ECM remodelling	GO:0097435	BP -supramolecular fiber organization	1.94507e-08	COL14A1,LMOD1,PLOD2,LTBP2,FURIN,LOXL2,SERPINH1,MYOZ1,COLGALT1,DSP,TPM2,TPM1,P3H1,P3H4,EMP2,TGFBR1,RHOB,GREM1,TSPAN15,ACTC1,DES,COL4A2,LOX,COL5A1,P4HA1,COL4A1,P4HA2,COL4A4,PXDN,COL5A2,TLL2,ARHGEF2,TGFBI,B4GALT7,DDR2
2	ECM remodelling	GO:0035987	BP -endodermal cell differentiation	0.000689044	ITGB5,COL4A2,MMP15,ITGAV,INHBA,ITGA5
2	ECM remodelling	GO:0007229	BP -integrin-mediated signaling pathway	0.00107047	LAMA5,SEMA7A,ITGB5,ITGB3,ITGA2,ITGAV,ITGA5,PTN,PLPP3
2	ECM remodelling	GO:0001706	BP -endoderm formation	0.00131784	ITGB5,COL4A2,MMP15,ITGAV,INHBA,ITGA5
2	ECM remodelling	GO:0070252	BP -actin-mediated cell contraction	0.00292677	CAMK2D,ACTC1,EMP2
2	ECM remodelling	GO:0038065	BP -collagen-activated signaling pathway	0.00292677	COL4A2,ITGA2,DDR2
2	ECM remodelling	GO:0048333	BP -mesodermal cell differentiation	0.00292677	BMP4,ITGA2,ITGB3
2	ECM remodelling	GO:0034113	BP -heterotypic cell-cell adhesion	0.00333316	DSP,ITGB3,PKP2,ITGAV,ITGA5
2	ECM remodelling	GO:0019798	MF -procollagen-proline dioxygenase activity	0.00200224	P4HA1,P4HA2,P3H1
2	ECM remodelling	KEGG:hsa04512	ECM-receptor interaction - Homo sapiens (human)	4.74965e-05	COL4A1,COL4A2,COL4A4,ITGA2,ITGA5,ITGAV,ITGB3,ITGB5,LAMA1,LAMA5,SV2A,THBS2
3	tissue morphogenesis ; wound healing	GO:0055010	BP -ventricular cardiac muscle tissue morphogenesis	1.57041e-06	DSP,TGFBR3,NOG,TPM1,PKP2,NRG1,ZFPM2,TGFBR1,SMAD7
3	tissue morphogenesis ; wound healing	GO:0007507	BP -heart development	1.49632e-05	CITED2,HTR2B,MICAL2,PKD2,HDAC9,TGFBR1,VEGFA,BMP4,TGFBR3,PKP2,ALPK3,ALPK2,ZFPM2,PDLIM4,SGCG,PDLIM7,STRA6,FBN1
3	tissue morphogenesis ; wound healing	GO:0048514	BP -blood vessel morphogenesis	1.87366e-05	TGFBR3,CDH2,LOX,COL4A1,LAMA1,ID1,TGFBR1,STRA6,SMAD7,VEGFA
3	tissue morphogenesis ; wound healing	GO:0003223	BP -ventricular compact myocardium morphogenesis	1.98172e-05	DSP,TGFBR3,NOG,TGFBR1
3	tissue morphogenesis ; wound healing	GO:0060412	BP -ventricular septum morphogenesis	3.51379e-05	BMP4,TGFBR3,CITED2,NOG,ZFPM2,TGFBR1,SMAD7
3	tissue morphogenesis ; wound healing	GO:0048844	BP -artery morphogenesis	5.68981e-05	BMP4,NOG,PKD2,TGFBR1,STRA6,SMAD7,VEGFA
3	tissue morphogenesis ; wound healing	GO:0055008	BP -cardiac muscle tissue morphogenesis	8.86008e-05	TGFBR3,ACTC1,NOG,TPM1,ANKRD1,PKP2,SMAD7
3	tissue morphogenesis ; wound healing	GO:0003281	BP -ventricular septum development	0.000277661	TGFBR3,CITED2,NOG,ZFPM2,TGFBR1,STRA6,SMAD7
3	tissue morphogenesis ; wound healing	GO:0003007	BP -heart morphogenesis	0.000428693	TGFBR3,ACTC1,NOG,HTR2B,ANKRD1,ALPK2,TGFBR1,VEGFA
3	tissue morphogenesis ; wound healing	GO:0042060	BP -wound healing	0.00064541	DSP,ITGB3,FZD7,NOG,TPM1,DYSF,NRG1,MYOZ1,TGFBR1
3	tissue morphogenesis ; wound healing	GO:0060840	BP -artery development	0.00096012	PKD2,TGFBR1,SMAD7,VEGFA,STRA6
3	tissue morphogenesis ; wound healing	GO:0055013	BP -cardiac muscle cell development	0.00117873	ACTC1,SORBS2,ALPK3,ALPK2,VEGFA
3	tissue morphogenesis ; wound healing	GO:0072359	BP -circulatory system development	0.00137686	CITED2,PKP2,MICAL2,ALPK3,ZFPM2,PKD2,HDAC9,PDLIM4,TGFBR1,PDLIM7,STRA6,FBN1
3	tissue morphogenesis ; wound healing	GO:0060977	BP -coronary vasculature morphogenesis	0.00200224	TGFBR3,TGFBR1,VEGFA
3	tissue morphogenesis ; wound healing	GO:0060415	BP -muscle tissue morphogenesis	0.00232214	BMP4,TGFBR3,ACTC1,ANKRD1
3	tissue morphogenesis ; wound healing	GO:0061384	BP -heart trabecula morphogenesis	0.00358054	TGFBR3,NOG,NRG1,TGFBR1
4	AGE-RAGE ; hippo ; focal adhesion	REAC:R-HSA-445355	Smooth Muscle Contraction Homo sapiens	0.000109139	ITGB5,SORBS1,CALD1,DYSF,TPM1,LMOD1,GUCY1A1,TPM2
4	AGE-RAGE ; hippo ; focal adhesion	GO:0030182	BP -neuron differentiation	0.00286642	XBP1,WNT2B,WNT5B,TENM4,FZD7,WNT7B,INHBA,PBX1,TGFBR1,MANF,VEGFA,OPHN1,ATOH8,ANOS1
4	AGE-RAGE ; hippo ; focal adhesion	KEGG:hsa04933	AGE-RAGE signaling pathway in diabetic complications - Homo sapiens (human)	0.0001669	AGT,COL4A1,COL4A2,COL4A4,ICAM1,NOX4,SERPINE1,STAT5A,TGFBR1,THBD,VEGFA,VEGFC
4	AGE-RAGE ; hippo ; focal adhesion	KEGG:hsa05165	Human papillomavirus infection - Homo sapiens (human)	0.000219042	ATP6V0B,ATP6V1G1,AXIN2,COL4A1,COL4A2,COL4A4,DLG3,FZD6,FZD7,ITGA2,ITGA5,ITGAV,ITGB3,ITGB5,LAMA1,LAMA5,MAML3,PPP2R5A,PPP2R5B,PTGS2,THBS2,VEGFA,WNT2B,WNT5B,WNT7B
4	AGE-RAGE ; hippo ; focal adhesion	KEGG:hsa05205	Proteoglycans in cancer - Homo sapiens (human)	0.000273924	CAMK2D,EIF4B,FZD6,FZD7,HBEGF,ITGA2,ITGA5,ITGAV,ITGB3,ITGB5,PLAU,PLAUR,PPP1R12B,TLR4,VEGFA,WNT2B,WNT5B,WNT7B
4	AGE-RAGE ; hippo ; focal adhesion	KEGG:hsa04390	Hippo signaling pathway - Homo sapiens (human)	0.000528344	AMOT,AXIN2,BMP4,CCN2,DLG3,FZD6,FZD7,ID1,SERPINE1,SMAD7,TGFBR1,WNT2B,WNT5B,WNT7B
4	AGE-RAGE ; hippo ; focal adhesion	KEGG:hsa04550	Signaling pathways regulating pluripotency of stem cells - Homo sapiens (human)	0.00135873	AXIN2,BMP4,FZD6,FZD7,ID1,ID3,INHBA,LEFTY2,LIF,SKIL,WNT2B,WNT5B,WNT7B
4	AGE-RAGE ; hippo ; focal adhesion	KEGG:hsa05217	Basal cell carcinoma - Homo sapiens (human)	0.00138594	AXIN2,BMP4,FZD6,FZD7,GADD45B,WNT2B,WNT5B,WNT7B
4	AGE-RAGE ; hippo ; focal adhesion	KEGG:hsa05200	Pathways in cancer - Homo sapiens (human)	0.00165818	ADCY7,AGT,ARNT2,AXIN2,BMP4,CALM2,CAMK2D,CDKN2A,COL4A1,COL4A2,COL4A4,DAPK3,EDNRA,FZD6,FZD7,GADD45B,IL12A,ITGA2,ITGAV,KITLG,LAMA1,LAMA5,PLEKHG5,PPARG,PTGS2,STAT5A,TGFBR1,VEGFA,VEGFC,WNT2B,WNT5B,WNT7B
4	AGE-RAGE ; hippo ; focal adhesion	KEGG:hsa04924	Renin secretion - Homo sapiens (human)	0.00249911	AGT,AQP1,CALM2,CTSB,EDNRA,GUCY1A1,PDE3A,PRKG2
4	AGE-RAGE ; hippo ; focal adhesion	KEGG:hsa04934	Cushing syndrome - Homo sapiens (human)	0.00278767	ADCY7,AGT,AXIN2,CAMK2D,CDKN2A,FZD6,FZD7,KCNK3,PBX1,PDE11A,WNT2B,WNT5B,WNT7B
4	AGE-RAGE ; hippo ; focal adhesion	KEGG:hsa04510	Focal adhesion - Homo sapiens (human)	0.00422244	COL4A1,COL4A2,COL4A4,ITGA2,ITGA5,ITGAV,ITGB3,ITGB5,LAMA1,LAMA5,PPP1R12B,RAPGEF1,THBS2,VEGFA,VEGFC
4	AGE-RAGE ; hippo ; focal adhesion	KEGG:hsa05222	Small cell lung cancer - Homo sapiens (human)	0.00442388	COL4A1,COL4A2,COL4A4,GADD45B,ITGA2,ITGAV,LAMA1,LAMA5,PTGS2
4	AGE-RAGE ; hippo ; focal adhesion	KEGG:hsa04151	PI3K-Akt signaling pathway - Homo sapiens (human)	0.00584338	COL4A1,COL4A2,COL4A4,EIF4B,IRS1,ITGA2,ITGA5,ITGAV,ITGB3,ITGB5,KITLG,LAMA1,LAMA5,MAGI2,NGF,PPP2R5A,PPP2R5B,PRLR,THBS2,TLR4,VEGFA,VEGFC
4	AGE-RAGE ; hippo ; focal adhesion	KEGG:hsa04916	Melanogenesis - Homo sapiens (human)	0.0081089	ADCY7,CALM2,CAMK2D,FZD6,FZD7,KITLG,WNT2B,WNT5B,WNT7B
5	coagulation and complement ; nitric oxide	REAC:R-HSA-418457	cGMP effects Homo sapiens	0.000281991	IRAG1,PDE11A,PRKG2,PDE5A,KCNMB1
5	coagulation and complement ; nitric oxide	REAC:R-HSA-109582	Hemostasis Homo sapiens	0.000831467	PLAUR,RAB27B,PPP2R5A,PPP2R5B,IRAG1,P2RX7,SERPINE1,VEGFA,SPARC,PLAU,PDE11A,SERPINE2,TUBB2A,ITGAV,PRKG2,PDE5A,SLC16A3,LEFTY2,RHOB,MANF,KCNMB1,SERPING1,VEGFC,DGKI,TAGLN2,ITGA5,KIF26B,GUCY1A1,ITGA2,F2RL2,ZFPM2,TNFRSF10D,A2M,THBD,GAS6,ADRA2C,PROS1,FAM3C,MAFK,ITGB3
5	coagulation and complement ; nitric oxide	REAC:R-HSA-114608	Platelet degranulation Homo sapiens	0.000989408	RAB27B,SERPINE1,VEGFA,SPARC,LEFTY2,MANF,SERPING1,VEGFC,TAGLN2,A2M,GAS6,PROS1,FAM3C,ITGB3
5	coagulation and complement ; nitric oxide	REAC:R-HSA-392154	Nitric oxide stimulates guanylate cyclase Homo sapiens	0.00143209	IRAG1,PDE11A,PRKG2,PDE5A,KCNMB1,GUCY1A1
5	coagulation and complement ; nitric oxide	REAC:R-HSA-76005	Response to elevated platelet cytosolic Ca2+ Homo sapiens	0.00145097	RAB27B,SERPINE1,VEGFA,SPARC,LEFTY2,MANF,SERPING1,VEGFC,TAGLN2,A2M,GAS6,PROS1,FAM3C,ITGB3
5	coagulation and complement ; nitric oxide	GO:0045055	BP -regulated exocytosis	5.23928e-05	SPARC,PROS1,ITGB3,SERPINE1,VEGFC,RAB27B,MANF,VEGFA,SYNGR1,SCIN,SYNGR2,SERPING1,TAGLN2,FAM3C,A2M,GAS6,STEAP2,LEFTY2
5	coagulation and complement ; nitric oxide	GO:0030195	BP -negative regulation of blood coagulation	5.51449e-05	THBD,SERPINE2,PLAU,SERPINE1,PLAUR,SERPING1,APOE,A2M
5	coagulation and complement ; nitric oxide	GO:0002576	BP -platelet degranulation	0.000104575	SPARC,PROS1,ITGB3,SERPINE1,VEGFC,RAB27B,MANF,VEGFA,SERPING1,TAGLN2,FAM3C,A2M,GAS6,LEFTY2
5	coagulation and complement ; nitric oxide	GO:1900047	BP -negative regulation of hemostasis	0.000554038	THBD,SERPINE2,SERPINE1,APOE
5	coagulation and complement ; nitric oxide	GO:0050819	BP -negative regulation of coagulation	0.00106041	THBD,SERPINE2,SERPINE1,APOE
5	coagulation and complement ; nitric oxide	GO:0030193	BP -regulation of blood coagulation	0.00205583	THBD,SERPINE2,SERPINE1,APOE,EPHB2
5	coagulation and complement ; nitric oxide	GO:0061045	BP -negative regulation of wound healing	0.00285741	THBD,SERPINE2,SERPINE1,APOE,MYOZ1
5	coagulation and complement ; nitric oxide	KEGG:hsa04610	Complement and coagulation cascades - Homo sapiens (human)	0.000157437	A2M,C1R,C1S,CFH,F2RL2,PLAU,PLAUR,PROS1,SERPINE1,SERPING1,THBD
6	TGFb and BMP pathway	GO:0060394	BP -negative regulation of pathway-restricted SMAD protein phosphorylation	1.25751e-07	GREM1,SNX25,NOG,PMEPA1,DKK1,SMAD7
6	TGFb and BMP pathway	GO:0030514	BP -negative regulation of BMP signaling pathway	6.33067e-05	GREM1,GREM2,NOG,RBPMS2,PPARG,SKIL,FSTL3,SMAD7,FBN1
6	TGFb and BMP pathway	GO:0035581	BP -sequestering of extracellular ligand from receptor	7.38955e-05	FBN2,GREM1,GREM2,NOG,FBN1
6	TGFb and BMP pathway	GO:0090101	BP -negative regulation of transmembrane receptor protein serine/threonine kinase signaling pathway	8.74627e-05	MAGI2,NOG,DKK1,VASN,TGFBR1,SMAD7,FSTL3,GREM1,SNX25,RBPMS2,PMEPA1,PPARG,SKIL
6	TGFb and BMP pathway	GO:0030510	BP -regulation of BMP signaling pathway	0.00117791	GREM1,BMP4,FOXD1,NOG,RBPMS2,PPARG,SKIL,FSTL3,SMAD7
6	TGFb and BMP pathway	GO:0038098	BP -sequestering of BMP from receptor via BMP binding	0.00200224	GREM1,GREM2,NOG
6	TGFb and BMP pathway	GO:0030512	BP -negative regulation of transforming growth factor beta receptor signaling pathway	0.00227658	FBN2,SNX25,PMEPA1,SKIL,TGFBR1,VASN,SMAD7,FBN1
6	TGFb and BMP pathway	GO:0001933	BP -negative regulation of protein phosphorylation	0.00234885	NIBAN1,IGFBP3,NOG,DKK1,SMAD7,GREM1,SFRP1,RASSF2,SNX25,PMEPA1,EPHB2,PLPP3,CALM2
6	TGFb and BMP pathway	KEGG:hsa04350	TGF-beta signaling pathway - Homo sapiens (human)	0.000385339	BMP4,FBN1,GREM1,GREM2,ID1,ID3,INHBA,LEFTY2,NOG,SMAD7,TGFBR1
7	unfolded protein response	REAC:R-HSA-381038	XBP1(S) activates chaperone genes Homo sapiens	2.03095e-08	PPP2R5B,DNAJB11,KDELR3,FKBP14,SERP1,SSR1,DNAJB9,SRPRB,HYOU1,EXTL1,LMNA,TPP1
7	unfolded protein response	REAC:R-HSA-381070	IRE1alpha activates chaperones Homo sapiens	3.28747e-08	PPP2R5B,DNAJB11,KDELR3,FKBP14,SERP1,SSR1,DNAJB9,SRPRB,HYOU1,EXTL1,LMNA,TPP1
7	unfolded protein response	REAC:R-HSA-381119	Unfolded Protein Response (UPR) Homo sapiens	1.33127e-06	HERPUD1,PPP2R5B,DNAJB11,KDELR3,FKBP14,SERP1,SSR1,DNAJB9,SRPRB,HYOU1,EXTL1,LMNA,TPP1
7	unfolded protein response	REAC:R-HSA-392499	Metabolism of proteins Homo sapiens	4.79762e-05	POMT2,PLAUR,VCAN,RAB27B,ADAMTS6,HERPUD1,EIF4B,PPP2R5B,FSTL3,PABPC1,LMCD1,B4GALT1,ACHE,DNAJB11,AARS1,TSPAN15,KDELR3,EEF1A2,SMAD7,STAG2,CTSH,RAB2A,RAB3D,TFPT,FKBP14,YKT6,TGFBR1,FAM20A,PPARGC1A,VDR,RAB23,GMDS,STC2,GORASP1,SSR3,MOGS,PAPPA2,MRPL37,EDEM3,MAN1C1,SLC17A5,TGFBI,SERP1,INHBA,RECK,SSR1,BMP4,VGF,DNAJB9,DAD1,APOE,ULBP2,PPARG,SEC61G,AGT,CKAP4,THSD1,TUBB2A,SPTBN5,FURIN,GALNT2,SRPRB,IGFBP3,CDKN2A…
7	unfolded protein response	GO:0036498	BP -IRE1-mediated unfolded protein response	2.03095e-08	XBP1,FKBP14,PPP2R5B,SERP1,EXTL1,DNAJB11,LMNA,DNAJB9,SSR1,SRPRB,HYOU1,TPP1,KDELR3
7	unfolded protein response	GO:0044267	BP -cellular protein metabolic process	0.000291206	CHRM3,HM13,PLOD2,FURIN,MRPL37,FSTL3,LOXL2,SERP1,CDH2,STC2,CTSH,APOE,LMCD1,SEC11C,IGFBP3,MRPS6,CKAP4,BMP4,VCAN,LOX,VGF,MMP15,EEF1A2,MELTF,GAS6,B4GALT7,LGMN,FBN1,PAPPA2
7	unfolded protein response	GO:0010873	BP -positive regulation of cholesterol esterification	0.00292677	STARD4,APOE,AGT
7	unfolded protein response	KEGG:hsa04141	Protein processing in endoplasmic reticulum - Homo sapiens (human)	0.00639562	CKAP4,DAD1,DNAJB11,EDEM3,HERPUD1,HSPA2,HYOU1,MAN1C1,MOGS,SEC61G,SSR1,SSR3,XBP1
8	protein phosphorylation	GO:0060393	BP -regulation of pathway-restricted SMAD protein phosphorylation	3.89893e-06	GREM1,BMP4,RBPMS,SNX25,NOG,PMEPA1,INHBA,DKK1,LEFTY2,TGFBR1,SMAD7
8	protein phosphorylation	GO:0001934	BP -positive regulation of protein phosphorylation	0.000524584	ITGB3,RASSF2,GPNMB,NPTN,LEFTY2,NIBAN1,IL11,RBPMS,SPHK1,LIMK2,LIF,PLAUR,VEGFC,INHBA,AXIN2,NGF,AGT,TGFBR1,VEGFA,BMP4,ARHGEF2,FAM20A,ITGA5,GAS6,CALM2,DDR2
8	protein phosphorylation	GO:0031954	BP -positive regulation of protein autophosphorylation	0.00096012	GREM1,RASSF2,GPNMB,CALM2,VEGFA
8	protein phosphorylation	GO:0031952	BP -regulation of protein autophosphorylation	0.00152773	RASSF2,GPNMB,PPP2R5B,PPP2R5A,CALM2,VEGFA
8	protein phosphorylation	GO:0031401	BP -positive regulation of protein modification process	0.00313006	NIBAN1,ANKLE2,NNMT,ITGB3,LIMK2,PLAUR,VEGFC,PPP2R5A,AXIN2,VEGFA,BMP4,GPNMB,NPTN,FAM20A,GAS6,CALM2
8	protein phosphorylation	GO:0050730	BP -regulation of peptidyl-tyrosine phosphorylation	0.00442388	IL11,SFRP1,RAP2B,ITGB3,LIF,ARHGEF2,ITGA5,AGT,VEGFA
8	protein phosphorylation	GO:0072542	MF -protein phosphatase activator activity	0.000778549	IGFBP3,PPP2R5B,PPP2R5A,CALM2
9	RHO GTPase ; L1CAM	REAC:R-HSA-373760	L1CAM interactions Homo sapiens	2.50088e-05	CNTN1,RPS6KA2,DLG3,LAMA1,CNTNAP1,EPHB2,SCN2A,TUBB2A,SPTBN5,ITGAV,NCAM1,ITGA5,ITGA2,ITGB3
9	RHO GTPase ; L1CAM	REAC:R-HSA-422475	Axon guidance Homo sapiens	0.00011247	CNTN1,CLTCL1,PABPC1,RPS6KA2,COL4A4,DLG3,LAMA1,CNTNAP1,COL5A1,PLXNA3,MYH10,EPHB2,COL4A2,SCN2A,TUBB2A,SPTBN5,ITGAV,SEMA7A,RHOB,SH3KBP1,NCAM1,GFRA1,ITGA5,ITGA2,PSMD2,LIMK2,COL4A1,PDLIM7,COL5A2,PSMB8,ITGB3
9	RHO GTPase ; L1CAM	REAC:R-HSA-1266738	Developmental Biology Homo sapiens	0.00112173	CNTN1,PKP2,CLTCL1,PABPC1,RPS6KA2,COL4A4,DLG3,DSP,LAMA1,TBL1X,PTGDS,CNTNAP1,PPARGC1A,COL5A1,PLXNA3,PPARG,MYH10,EPHB2,COL4A2,SCN2A,TUBB2A,SPTBN5,ITGAV,SEMA7A,FURIN,LEFTY2,RHOB,SH3KBP1,NCAM1,GFRA1,UTRN,ITGA5,IVL,ITGA2,ANGPTL4,ZFPM2,CDH2,PSMD2,LIMK2,PBX1,COL4A1,MAML3,PDLIM7,MBP,COL5A2,PSMB8,KRTAP2-3,ITGB3,H2BC8
9	RHO GTPase ; L1CAM	REAC:R-HSA-5627117	RHO GTPases Activate ROCKs Homo sapiens	0.00232214	PPP1R12B,MYH10,RHOB,LIMK2
9	RHO GTPase ; L1CAM	GO:0007411	BP -axon guidance	0.000689115	EPHB6,LAMA5,SPTBN5,SEMA7A,SEMA3C,SH3KBP1,LAMA1,SEMA3B,GFRA1,VEGFA,OPHN1,ANOS1,NPTN,NCAM1,EPHB2,PDLIM7,PLXNA3
9	RHO GTPase ; L1CAM	GO:0071679	BP -commissural neuron axon guidance	0.00200224	NCAM1,EPHB2,VEGFA
9	RHO GTPase ; L1CAM	GO:0007409	BP -axonogenesis	0.00411115	EPHB6,NTNG1,LAMA5,SPTBN5,SEMA7A,SEMA3C,SH3KBP1,LAMA1,SEMA3B,GFRA1,ZDHHC17,OPHN1,ANOS1,NPTN,NCAM1,EPHB2,PDLIM7
10	endothelial cell migration ; angiogenesis	GO:0045765	BP -regulation of angiogenesis	2.54216e-05	XBP1,SPARC,HSPB6,CEMIP2,SPHK1,SERPINE1,VEGFC,EMP2,THBS2,AQP1,RHOB,VEGFA,AMOT,SFRP1,GPNMB,COL4A2,ADAM12,CTSH,PPARG,ANGPTL4
10	endothelial cell migration ; angiogenesis	GO:0002040	BP -sprouting angiogenesis	6.33067e-05	GREM1,BMP4,ESM1,RSPO3,VEGFC,RECK,E2F7,LOXL2,VEGFA
10	endothelial cell migration ; angiogenesis	GO:0045766	BP -positive regulation of angiogenesis	0.00066363	XBP1,HSPB6,SPHK1,SERPINE1,ADAM12,CTSH,VEGFC,ANGPTL4,ITGA5,AQP1,RHOB,VEGFA
10	endothelial cell migration ; angiogenesis	GO:0010595	BP -positive regulation of endothelial cell migration	0.000738232	STAT5A,BMP4,SPARC,ITGB3,ATOH8,PLPP3,AGT,RHOB,VEGFA,LGMN
10	endothelial cell migration ; angiogenesis	GO:1904018	BP -positive regulation of vasculature development	0.000776206	XBP1,HSPB6,SPHK1,SERPINE1,ADAM12,CTSH,VEGFC,ANGPTL4,AQP1,RHOB,VEGFA
10	endothelial cell migration ; angiogenesis	GO:0010594	BP -regulation of endothelial cell migration	0.000966899	BMP4,SPARC,ITGB3,ATOH8,EMP2,PTN,APOE,AGT,RHOB,VEGFA
10	endothelial cell migration ; angiogenesis	GO:0001936	BP -regulation of endothelial cell proliferation	0.00125059	STAT5A,BMP4,SPARC,ITGB3,ATOH8,HTR2B,VEGFC,APOE,TGFBR1,VEGFA
11	epithelial to mesenchymal transition	GO:1905332	BP -positive regulation of morphogenesis of an epithelium	9.9937e-05	BMP4,WNT5B,NOG,LIF,AGT,VEGFA
11	epithelial to mesenchymal transition	GO:0090189	BP -regulation of branching involved in ureteric bud morphogenesis	0.00140685	BMP4,NOG,AGT,VEGFA
11	epithelial to mesenchymal transition	GO:0007399	BP -nervous system development	0.0018144	ACHE,CHRM3,IGSF8,ANKLE2,PTN,PKD2,SCIN,CDH2,OPHN1,MBP,EPHB2,MYLIP,ARNT2,NOG,APLP1,LSAMP,NRG1,GFRA1,NAV1,INHBA,NGF,DCLK1,TGFBR1,VEGFA,ALDH3A2,VCAN,TPP1,SCN2A
11	epithelial to mesenchymal transition	GO:0051240	BP -positive regulation of multicellular organismal process	0.00206062	ACHE,XBP1,FOXD1,CADM1,VDR,SERPINE1,NOG,HTR2B,PTN,INHBA,AXIN2,PLAAT4,PRLR,AGT,TGFBR1,VEGFA,LOXL2,BMP4,FABP5,APOE,GAS6,PPARGC1A,ODAPH
11	epithelial to mesenchymal transition	GO:0051241	BP -negative regulation of multicellular organismal process	0.00313006	NPR3,DKK1,HDAC9,VASN,LOXL2,SMAD7,BMP4,SFRP1,GPNMB,NOVA1,ID1,NPTN,ALPK2,GAS6,TLR4,LGR4
11	epithelial to mesenchymal transition	GO:0010717	BP -regulation of epithelial to mesenchymal transition	0.00457103	GREM1,PHLDB1,SFRP1,AXIN2,TGFBR1,VASN,LOXL2,SMAD7
12	cell motility	GO:0030334	BP -regulation of cell migration	3.59936e-05	SEMA7A,SERPINE2,SEMA3C,CITED2,SERPINE1,SEMA3B,SYNE2,AMOT,GPNMB,PLAU,LMNA,CTSH,EPHB2,ARPIN,PLXNA3,NTNG1,XBP1,WNT5B,SPHK1,MAGI2,TPM1,NOG,SOD2,TGFBR1,RHOB,VEGFA,SMAD7,SFRP1,RAP2B,RECK,HBEGF
12	cell motility	GO:0030336	BP -negative regulation of cell migration	0.00144772	CITED2,IGFBP3,SERPINE1,MAGI2,TPM1,NOG,SMAD7,RHOB,SFRP1,RAP2B,HAS1,RECK,ARPIN
12	cell motility	GO:2000146	BP -negative regulation of cell motility	0.0019359	SFRP1,RAP2B,CITED2,SERPINE1,MAGI2,TPM1,NOG,RECK,ARPIN,SMAD7,RHOB
12	cell motility	GO:0014032	BP -neural crest cell development	0.00424289	SEMA7A,SEMA3C,CDH2,SEMA3B,HTR2B,NRG1
12	cell motility	GO:2000147	BP -positive regulation of cell motility	0.0042836	XBP1,SEMA7A,CAVIN1,WNT5B,SEMA3C,SPHK1,SEMA3B,SOD2,SYNE2,TGFBR1,VEGFA,GPNMB,PLAU,CTSH,EPHB2,HBEGF
12	cell motility	GO:0045499	MF -chemorepellent activity	0.00143209	DPP4,SEMA7A,SEMA3C,SEMA3B,NRG1
13	glycosaminoglycan synthesis	REAC:R-HSA-1630316	Glycosaminoglycan metabolism Homo sapiens	0.000966637	B4GALT7,VCAN,NDST1,B4GALT1,XYLT1,HAS1,UST,HS3ST2,HS3ST3B1,SLC26A2,CSGALNACT2,GPC6,CHSY3
13	glycosaminoglycan synthesis	GO:0006024	BP -glycosaminoglycan biosynthetic process	0.000124397	HS3ST3B1,NDST1,VCAN,B4GALT1,HAS1,CSGALNACT2,UST,XYLT1,CHSY3,B4GALT7,GPC6,HS3ST2
13	glycosaminoglycan synthesis	GO:0006023	BP -aminoglycan biosynthetic process	0.00136239	HS3ST3B1,NDST1,HAS1,XYLT1,B4GALT7,GPC6,HS3ST2
13	glycosaminoglycan synthesis	GO:0030203	BP -glycosaminoglycan metabolic process	0.00242222	HS3ST3B1,NDST1,HAS1,XYLT1,B4GALT7,GPC6,HS3ST2
13	glycosaminoglycan synthesis	KEGG:hsa00534	Glycosaminoglycan biosynthesis - heparan sulfate / heparin - Homo sapiens (human)	1.12611e-05	B4GALT7,EXTL1,HS3ST2,HS3ST3B1,NDST1,XYLT1
14	neuron differentiation	GO:0045597	BP -positive regulation of cell differentiation	1.0851e-05	FBN2,XBP1,WNT7B,IGFBP3,LMO3,PTN,AXIN2,ADRA2C,NGF,AGT,TGFBR1,LOXL2,BMP4,SFRP1,GPRC5B,KITLG,ZEB1,BRINP1,CDH2,PPP1R13L,PPARG,CCN2,ARHGEF2,DDR2
14	neuron differentiation	GO:0045595	BP -regulation of cell differentiation	0.00102386	PHLDB1,LIF,EMP2,NREP,NGF,TGFBR1,SMAD7,GREM1,SCIN,BIN1,PPP1R13L,SMOC1,FLOT2,CCN2
14	neuron differentiation	GO:0045664	BP -regulation of neuron differentiation	0.00155343	GPRC5B,ZEB1,BRINP1,BIN1,ARHGEF2,NREP,ADRA2C,NGF,DKK1
14	neuron differentiation	GO:0045666	BP -positive regulation of neuron differentiation	0.00336521	GPRC5B,BRINP1,ZEB1,ARHGEF2,ADRA2C,NGF
15	eye morphogenesis	GO:0001654	BP -eye development	0.000152463	FBN2,SALL2,COL5A1,LAMA1,SMOC1,COL5A2,PBX1,STRA6,FBN1
15	eye morphogenesis	GO:0048592	BP -eye morphogenesis	0.00048191	FBN2,COL5A1,COL5A2,VEGFA,FBN1
15	eye morphogenesis	GO:0043010	BP -camera-type eye development	0.00205583	FBN2,LAMA1,STRA6,VEGFA,FBN1
15	eye morphogenesis	GO:0090596	BP -sensory organ morphogenesis	0.00292677	COL5A1,COL5A2,STRA6
16	branched chain amino acid catabolism	REAC:R-HSA-70895	Branched-chain amino acid catabolism Homo sapiens	0.00096012	HIBADH,ALDH6A1,MCCC2,PPM1K,ACADSB
16	branched chain amino acid catabolism	GO:0009083	BP -branched-chain amino acid catabolic process	0.0043552	MCCC2,ALDH6A1,HIBADH,ACADSB
16	branched chain amino acid catabolism	GO:0009081	BP -branched-chain amino acid metabolic process	0.0043552	MCCC2,ALDH6A1,HIBADH,ACADSB
16	branched chain amino acid catabolism	KEGG:hsa00280	Valine, leucine and isoleucine degradation - Homo sapiens (human)	0.00120293	ACADSB,ALDH3A2,ALDH6A1,ALDH7A1,HIBADH,MCCC2,OXCT1
17	endopeptidase inhibition	REAC:R-HSA-75205	Dissolution of Fibrin Clot Homo sapiens	0.000778549	PLAUR,SERPINE1,PLAU,SERPINE2
17	endopeptidase inhibition	GO:0052548	BP -regulation of endopeptidase activity	0.000716923	SERPINE2,SERPINE1,SERPINH1,SERPING1,FURIN,ATP13A2,AGT,PSMB8,PICALM
17	endopeptidase inhibition	GO:0004866	MF -endopeptidase inhibitor activity	0.000613783	SERPINE2,BIN1,PROS1,SERPINE1,TFPI2,SERPINH1,SERPING1,FURIN,A2M,NGF,RECK,AGT
17	endopeptidase inhibition	GO:0004867	MF -serine-type endopeptidase inhibitor activity	0.00100208	SERPINE2,SERPINE1,TFPI2,SERPINH1,SERPING1,FURIN,A2M,AGT
18	apoptosis	GO:0043065	BP -positive regulation of apoptotic process	0.00116381	MTCH1,GADD45B,TNFRSF12A,IGFBP3,PLEKHG5,DAPK3,PNMA2,NGF,TPD52L1,TGFBR1,RHOB,BMP4,ABR,TFPT,SFRP1,RASSF2,SCIN,BIN1,RPS6KA2,ANKRD1,MAP3K20,ARHGEF2
18	apoptosis	GO:0042981	BP -regulation of apoptotic process	0.00116874	MTCH1,ANKLE2,CITED2,HTR2B,FHL2,AQP1,ABR,BABAM2,TFPT,RASSF2,SCIN,RPS6KA2,MAP3K20,ANKRD1,CTSH,CTSB,XBP1,GADD45B,TNFRSF12A,SPHK1,IGFBP3,PLEKHG5,DAPK3,PLAUR,PNMA2,NGF,DKK1,PRLR,AGT,TNFRSF10D,RHOB,VEGFA,BMP4,GREM1,SFRP1,TP53I3,BIN1,GAS1,ANGPTL4,ALPK2,ARHGEF2,GAS6
18	apoptosis	GO:0043068	BP -positive regulation of programmed cell death	0.00226813	MTCH1,GADD45B,TNFRSF12A,IGFBP3,PLEKHG5,DAPK3,PNMA2,NGF,RHOB,BMP4,ABR,TFPT,SFRP1,RASSF2,SCIN,BIN1,RPS6KA2,ANKRD1,MAP3K20,ARHGEF2
19	gland development	GO:0048732	BP -gland development	0.00299498	TGFBR3,XBP1,TG,CITED2,NRG1,PKD2,TGFBR1,STRA6
19	gland development	GO:0061008	BP -hepaticobiliary system development	0.0043552	TGFBR3,XBP1,CITED2,PKD2
19	gland development	GO:0001889	BP -liver development	0.00445112	TGFBR3,XBP1,CITED2,PKD2,E2F7
20	response to growth factor	GO:0071560	BP -cellular response to transforming growth factor beta stimulus	0.0019359	TGFBR3,SFRP1,ITGB5,ID1,PDE3A,ANKRD1,LTBP2,FURIN,LEFTY2,TGFBR1,SMAD7
20	response to growth factor	GO:0071363	BP -cellular response to growth factor stimulus	0.0032913	SPHK1,MAGI2,TGFBR1,SMAD7,VEGFA,BMP4,SFRP1,HAS1,PDE3A,ANKRD1,RAPGEF1,GAS1,LGMN
20	response to growth factor	GO:0038180	BP -nerve growth factor signaling pathway	0.00407466	MAGI2,RAPGEF1,NGF
21	myofibril assembly	GO:0031032	BP -actomyosin structure organization	1.04534e-05	CSRP2,ACTC1,ITGB5,CSRP1,EPB41L2,TPM1,LMOD1,ANKRD1,SORBS1,MYOZ1,CDC42BPA,MYH10
21	myofibril assembly	GO:0030239	BP -myofibril assembly	0.000610813	CSRP2,ACTC1,CSRP1,TPM1,LMOD1,ANKRD1,MYOZ1
21	myofibril assembly	GO:0045214	BP -sarcomere organization	0.00243274	CSRP2,CSRP1,TPM1,ANKRD1,MYOZ1
22	kidney/lung development	GO:0001656	BP -metanephros development	0.00172337	BMP4,FOXD1,WNT7B,CTSH,PKD2
22	kidney/lung development	GO:0001822	BP -kidney development	0.00273829	KANK2,BMP4,MME,CTSH,TGFBR1,AGT,STRA6,VEGFA
22	kidney/lung development	GO:0060428	BP -lung epithelium development	0.00407466	BMP4,WNT7B,STRA6
23	pos.regulation of Wnt pathway	GO:2000052	BP -positive regulation of non-canonical Wnt signaling pathway	1.85889e-05	SFRP1,WNT5B,RSPO3,PLEKHA4,DKK1
23	pos.regulation of Wnt pathway	GO:2000096	BP -positive regulation of Wnt signaling pathway, planar cell polarity pathway	0.000753108	RSPO3,PLEKHA4,DKK1
23	pos.regulation of Wnt pathway	GO:2000095	BP -regulation of Wnt signaling pathway, planar cell polarity pathway	0.00292677	RSPO3,PLEKHA4,DKK1
24	cardiomyopathy	KEGG:hsa05414	Dilated cardiomyopathy - Homo sapiens (human)	5.11128e-06	ACTC1,ADCY7,AGT,DES,ITGA2,ITGA5,ITGAV,ITGB3,ITGB5,LAMA1,LMNA,SGCG,TPM1,TPM2
24	cardiomyopathy	KEGG:hsa05412	Arrhythmogenic right ventricular cardiomyopathy - Homo sapiens (human)	1.20005e-05	CDH2,DES,DSP,ITGA2,ITGA5,ITGAV,ITGB3,ITGB5,LAMA1,LMNA,PKP2,SGCG
24	cardiomyopathy	KEGG:hsa05410	Hypertrophic cardiomyopathy - Homo sapiens (human)	1.23024e-05	ACTC1,AGT,DES,ITGA2,ITGA5,ITGAV,ITGB3,ITGB5,LAMA1,LMNA,SGCG,TPM1,TPM2
25	oxidative stress	GO:0062197	BP -cellular response to chemical stress	0.000714245	GPX3,ALDH3B1,GPX8,PYCR1,NOX4,ATP13A2,PKD2,SOD2,PPARGC1A,CPEB2,SOD3
25	oxidative stress	GO:0034599	BP -cellular response to oxidative stress	0.001285	GPX3,ALDH3B1,TPM1,GPX8,PYCR1,NOX4,ATP13A2,PKD2,SOD2,PPARGC1A,CPEB2,SOD3
26	T cell mediated cytotoxicity	GO:0001913	BP -T cell mediated cytotoxicity	8.74962e-05	CADM1,CTSH,EMP2,MICA
26	T cell mediated cytotoxicity	GO:0002456	BP -T cell mediated immunity	0.00182506	CADM1,CTSH,EMP2,MICA
27	aldehyde dehydrogenase activity	GO:0004030	MF -aldehyde dehydrogenase [NADP)+] activity	0.00140685	ALDH3A2,ALDH3B1,ALDH1L2,ALDH7A1
27	aldehyde dehydrogenase activity	KEGG:hsa00330	Arginine and proline metabolism - Homo sapiens (human)	0.00153789	ALDH3A2,ALDH7A1,P4HA1,P4HA2,PYCR1,SAT1,SRM
28	nitric oxide signalling	GO:0007263	BP -nitric oxide mediated signal transduction	0.00290504	GUCY1A1,FPR1,APOE,AGT
28	nitric oxide signalling	GO:0019932	BP -second-messenger-mediated signaling	0.00354375	LAT2,CHRM3,GUCY1A1,SPHK1,RCAN2,HTR2B,FPR1,APOE,AGT
29	cGMP signalling	GO:0019934	BP -cGMP-mediated signaling	7.38955e-05	HTR2B,IRAG1,PDE3A,APOE,AQP1
29	cGMP signalling	GO:0019935	BP -cyclic-nucleotide-mediated signaling	0.000194962	HTR2B,IRAG1,PDE3A,AKAP6,APOE,PDE7B,AQP1
n/a	regulation signal transduction	GO:0009967	BP -positive regulation of signal transduction	6.54327e-05	XBP1,CITED2,IRS1,LMO3,ITGB3,EMP2,SORBS1,ERFE,PKD2,TPD52L1,TXNDC15,TGFBR1,SFRP1,ESM1,NPTN,RSPO3,ITGAV,MAML3,ITGA5,GAS6,LIMS2,MYORG
n/a	renal tubule development	GO:0061326	BP -renal tubule development	0.000386461	COL4A1,PKD2,MTSS1
n/a	cellular response to hypoxia	GO:0036294	BP -cellular response to decreased oxygen levels	0.000579833	SFRP1,TBL2,LMNA,HYOU1,PTGS2,SCN2A,CPEB2,AQP1,VEGFA
n/a	muscle tissue development	GO:0060537	BP -muscle tissue development	0.000778549	BMP4,CSRP2,CSRP1,STRA6
n/a	regulation of cell-cell adhesion	GO:0022409	BP -positive regulation of cell-cell adhesion	0.00105846	ADAM19,CITED2,PLAUR,PIEZO1,PLPP3,FSTL3,SMAD7
n/a	bleb assembly	GO:0032060	BP -bleb assembly	0.00128421	P2RX7,EMP1,EMP2
n/a	striated muscle cell differentiation	GO:0051153	BP -regulation of striated muscle cell differentiation	0.00128421	HDAC5,NRG1,HDAC9
n/a	blood circulation	GO:0008015	BP -blood circulation	0.0017305	GUCY1A1,HTR7,ACTC1,ELN,TBC1D8,SERPING1,SGCG
n/a	natural killer cell differentiation	GO:0001779	BP -natural killer cell differentiation	0.00200224	NFIL3,TOX,PBX1
n/a	endothelial cell migration	GO:0043542	BP -endothelial cell migration	0.00202279	DPP4,PLEKHG5,ID1,EMP2,LOXL2,VEGFA
n/a	Ras protein transduction	GO:0046578	BP -regulation of Ras protein signal transduction	0.00280732	EPS8,KANK2,LRRC59,OPHN1,DENND4C,RAPGEF1,ARHGEF2,EPHB2,NGF
n/a	limb development	GO:0060173	BP -limb development	0.00285741	GREM1,SMOC1,NOG,MAP3K20,DKK1
n/a	bone resorption	GO:0045453	BP -bone resorption	0.00292677	RAB3D,ACP5,TPP1
n/a	regulation of long term synaptic potentiation	GO:1900271	BP -regulation of long-term synaptic potentiation	0.00333316	CALB2,PTN,APOE,EPHB2,LGMN
n/a	detection mechanical stimulus	GO:0050982	BP -detection of mechanical stimulus	0.00358054	CDH2,PIEZO1,PKD1L2,PKD2
n/a	amyloid precursor catabolism	GO:1902992	BP -negative regulation of amyloid precursor protein catabolic process	0.00358054	BIN1,FLOT2,APOE,PICALM
n/a	muscle cell differentiation	GO:0051154	BP -negative regulation of striated muscle cell differentiation	0.00358054	HDAC5,XBP1,FZD7,DKK1
n/a	chordate embryonic development	GO:0043009	BP -chordate embryonic development	0.0036541	ARNT2,WNT7B,NOG,XYLT1,PKD2,TGFBR1,VEGFA
n/a	lipoprotein transport	GO:0042953	BP -lipoprotein transport	0.00407466	VMP1,PPARG,ZDHHC17
n/a	lipid storage	GO:0010888	BP -negative regulation of lipid storage	0.0043552	ITGB3,ITGAV,PPARG,TTC39B
n/a	regulation of cell migration	GO:0090049	BP -regulation of cell migration involved in sprouting angiogenesis	0.00445112	HDAC5,CARD10,PTGS2,HDAC9,VEGFA
n/a	actin binding	GO:0003779	MF -actin binding	4.19573e-05	SPTBN5,TPM2,TPM1,MICAL2,SORBS1,SYNE2,MTSS1,NCALD,EPS8,SCIN,MLPH,CALD1,LCP1,MYOZ1,UTRN,MYH10,PDLIM4,PDLIM7
n/a	actinin binding	GO:0042805	MF -actinin binding	0.000614702	CSRP2,CSRP1,PPARG,PKD2,PDLIM4
n/a	protein kinase C binding	GO:0005080	MF -protein kinase C binding	0.000810496	DSP,HDAC5,IRS1,CAVIN2,PKP2,ITGAV,HDAC9
n/a	potassium channel activity	GO:0005267	MF -potassium channel activity	0.00114935	KCNK6,KCND1,KCNT2,KCNA1,KCNMB1,KCNC4,GRIK2,PKD2,KCNK3,AQP1
n/a	phagosome	KEGG:hsa04145	Phagosome - Homo sapiens (human)	0.00234885	ATP6V0B,ATP6V1G1,C1R,DYNC2H1,ITGA2,ITGA5,ITGAV,ITGB3,ITGB5,SEC61G,THBS2,TLR4,TUBB2A
